# Supplementary material
Source: MDPI journal article supplement (https://www.mdpi.com/1424-2818/12/8/288)
Supplement: s1 [file s1]

## Supplementary material

**Table S1.** Taxa included in the matrices of Macaronesia (Mac) and the Iberian Peninsula (IB), including COI and 28S GenBank accession numbers. \*These codes belong to different, closely-related species.

| Family           | Species                   | COI      | 28S       | Matrix |
|------------------|---------------------------|----------|-----------|--------|
| Agelenidae       | Eratigena_feminea         | MT607736 | MT651952  | IB     |
|                  | Eratigena_fuesslini       | MT607737 | MT651818  | IB     |
|                  | Eratigena_inermis         | MT607738 | MT651953  | IB     |
|                  | Eratigena_montigena       | MT607739 | MT651831  | IB     |
|                  | Eratigena_picta           | MT607740 | MT651837  | IB     |
|                  | Malthonica_lusitanica     | MT607804 | MT651829  | IB     |
|                  | Tegenaria_domestica       | MT738855 | MT651762  | Mac    |
|                  | Tegenaria_pagana          | MT738856 | MT651801  | Mac    |
|                  | Textrix_caudata           | MT607915 | MT651943  | IB     |
|                  | Textrix_denticulata       | MT607916 | MT651945  | IB     |
|                  | Textrix_pinicola          | MT607917 | MT651944  | IB     |
| Anyphaenidae     | Anyphaena_accentuata      | MT607664 | MT651949  | IB     |
|                  | Anyphaena_sabina          | MT607665 | MT651948  | IB     |
| Araneidae        | Araneus_angulatus         | MT607666 | MT652004* | IB     |
|                  | Araneus_grossus           | MT607667 | MT652004  | IB     |
|                  | Araneus_sturmi            | MT607668 | MT652046  | IB     |
|                  | Araneus_triguttatus       | MT607669 | MT651689  | IB     |
|                  | Araniella_alpica          | MT607670 | MT652032  | IB     |
|                  | Araniella_cucurbitina     | MT607671 | MT651725  | IB     |
|                  | Araniella_maderiana       | MT738763 | MT651772  | Mac    |
|                  | Araniella_opisthographa   | MT607672 | MT652033  | IB     |
|                  | Cercidia_prominens        | MT607688 | MT651639  | IB     |
|                  | Cyclosa_algerica          | MT607708 | MT651849  | IB     |
|                  | Cyclosa_conica            | MT607709 | MT651983  | IB     |
|                  | Cyclosa_maderiana         | MT738780 | MT651783  | Mac    |
|                  | Gibbaranea_bituberculata  | MT607755 | MT651969  | IB     |
|                  | Gibbaranea_gibbosa        | MT607756 | MT651970  | IB     |
|                  | Gibbaranea_occidentalis   | MT738806 | MT651756  | Mac    |
|                  | Gibbaranea_tenerifensis   | MT738807 | MT651803  | Mac    |
|                  | Hypsosinga_sanguinea      | MT607780 |           | IB     |
|                  | Larinioides_sclopetarius  | MT607786 | MT651640  | IB     |
|                  | Leviellus_kochi           | MT607795 | MT651996  | IB     |
|                  | Mangora_acalypha          | MT607805 | MT651861  | IB     |
|                  | Neoscona_adiantha         | MT607826 | MT651908  | IB     |
|                  | Neoscona_crucifera        | MT738830 | MT651776  | Mac    |
|                  | Nuctenea_umbratica        | MT607833 | MT651701  | IB     |
|                  | Zilla_diodia              | MT607948 | MT652003  | IB     |
|                  | Zygiella_minima           | MT738875 | MT651799  | Mac    |
|                  | Zygiella_montana          | MT607961 | MT651698  | IB     |
| Cheiracanthiidae | Cheiracanthium_albidulum  | MT738773 | MT651766  | Mac    |
|                  | Cheiracanthium_canariense | MT738774 | MT652059  | Mac    |
|                  | Cheiracanthium_elegans    | MT607691 | MT651950  | IB     |
|                  | Cheiracanthium_erraticum  | MT738775 | MT651798  | Mac    |

|             |                            |          |          |     |
|-------------|----------------------------|----------|----------|-----|
| Clubionidae | Cheiracanthium_striolatum  | MT607692 | MT651955 | IB  |
|             | Cheiracanthium_virescens   | MT607693 | MT651683 | IB  |
|             | Clubiona_brevipes          | MT607698 | MT652052 | IB  |
|             | Clubiona_comta             | MT607699 | MT651924 | IB  |
|             | Clubiona_corticalis        | MT607700 | MT651684 | IB  |
|             | Clubiona_neglecta          | MT607704 | MT651925 | IB  |
|             | Clubiona_terrestris        | MT607705 | MT651820 | IB  |
|             | Porrhoclubiona_decora      | MT738777 | MT652081 | Mac |
|             | Porrhoclubiona_diniensis   | MT607701 | MT651965 | IB  |
|             | Porrhoclubiona_genevensis  | MT607702 | MT651685 | IB  |
|             | Porrhoclubiona_leucaspis   | MT607703 | MT651626 | IB  |
|             | Porrhoclubiona_minor       | MT738778 | MT652072 | Mac |
|             | Porrhoclubiona_pseudominor | MT738843 | MT652060 | Mac |
| Dictynidae  | Brigittea_civica           | MH630515 | MT651928 | IB  |
|             | Brigittea_Dictynidae4      | MH630491 | MT651835 | IB  |
|             | Brigittea_latens           | MH630546 | MT651929 | IB  |
|             | Dictyna_pusilla            | MH630552 | MT651917 | IB  |
|             | Lathys_affinis             | MT738812 | MT651771 | Mac |
|             | Lathys_dentichelis         | MT738813 | MT651809 | Mac |
|             | Lathys_Dictynidae01        | MH630562 | MT651638 | IB  |
|             | Lathys_humilis             | MH630556 | MT652036 | IB  |
|             | Marilynia_bicolor          | MH630591 | MT651866 | IB  |
|             | Nigma_Dictynidae19         | MH630659 | MT651669 | IB  |
|             | Nigma_gratiosa             | MH630665 | MT651627 | IB  |
|             | Nigma_puella               | MH630676 | MT651855 | IB  |
|             | Nigma_sp                   | MT738831 | MT651786 | Mac |
| Dysderidae  | Dysdera_brevisetae         | MT738782 | MT651748 | Mac |
|             | Dysdera_brevispina         | MT738783 | MT651749 | Mac |
|             | Dysdera_coiffaiti          | MT738784 | MT651760 | Mac |
|             | Dysdera_crocata            | MT738785 | MT652087 | Mac |
|             | Dysdera_Dysderidae3        | MT607724 | MT651878 | IB  |
|             | Dysdera_Dysderidae33       | MT607723 | MT651656 | IB  |
|             | Dysdera_Dysderidae39       | MT607722 | MT651848 | IB  |
|             | Dysdera_enghoffi           | MT738786 | MT651757 | Mac |
|             | Dysdera_erythrina          | MT607726 | MT651823 | IB  |
|             | Dysdera_falciformis        | MT607727 | MT651874 | IB  |
|             | Dysdera_flavitarsis        | MT607725 | MT651879 | IB  |
|             | Dysdera_fuscipes           | MT607728 | MT651876 | IB  |
|             | Dysdera_gamarrae           | MT607729 | MT651877 | IB  |
|             | Dysdera_gomerensis         | MT738787 | MT652074 | Mac |
|             | Dysdera_iguanensis         | MT738788 | MT651751 | Mac |
|             | Dysdera_insulana           | MT738789 | MT651750 | Mac |
|             | Dysdera_levipes            | MT738790 | MT652056 | Mac |
|             | Dysdera_ramblae            | MT738793 | MT651745 | Mac |
|             | Dysdera_silvatica          | MT738794 | MT651744 | Mac |
|             | Dysdera_sp1                | MT738791 | MT652061 | Mac |
|             | Dysdera_sp2                | MT738792 | MT651804 | Mac |
|             | Dysdera_verneuui           | MT738795 | MT652062 | Mac |

|             |                             |          |          |     |
|-------------|-----------------------------|----------|----------|-----|
|             | Harpactea_Dysderidae16      | MT607769 | MT651872 | IB  |
|             | Harpactea_Dysderidae21      |          | MT651630 | IB  |
|             | Harpactea_Dysderidae43      | MT607768 |          | IB  |
|             | Harpactea_fageli            | MT607770 | MT651871 | IB  |
|             | Harpactea_hombergi          | MT607771 | MT651873 | IB  |
|             | Harpactocrates_Dysderidae10 | MT607772 | MT651657 | IB  |
|             | Parachtes_teruelis          | MT607852 | MT651880 | IB  |
|             | Rhode_scutiventris          | MT607888 | MT652008 | IB  |
| Gnaphosidae | Callilepis_concolor         | MT607681 | MT651734 | IB  |
|             | Callilepis_nocturna         | MT607682 | MT652048 | IB  |
|             | Civizelotes_civicus         | MT607694 | MT651827 | IB  |
|             | Civizelotes_dentatidens     | MT607695 |          | IB  |
|             | Civizelotes_medianoides     | MT607696 |          | IB  |
|             | Civizelotes_medeanus        | MT607697 | MT651963 | IB  |
|             | Drassodes_lapidus           | MT607717 | MT651927 | IB  |
|             | Drassodes_lutescens         | MT607718 | MT651922 | IB  |
|             | Drassodes_pubescens         | MT607719 | MT651911 | IB  |
|             | Drassodes_sp                | MT738781 | MT651802 | Mac |
|             | Drassyllus_praeficus        | MT607720 | MT651843 | IB  |
|             | Drassyllus_villicus         | MT607721 | MT651962 | IB  |
|             | Haplodrassus_dalmatensis    | MT607763 | MT651644 | IB  |
|             | Haplodrassus_macellinus     | MT607764 | MT651966 | IB  |
|             | Haplodrassus_signifer       | MT607765 | MT651828 | IB  |
|             | Haplodrassus_silvestris     | MT607766 | MT651959 | IB  |
|             | Haplodrassus_umbratilis     | MT607767 | MT651852 | IB  |
|             | Leptodrassus_femineus       | MT607792 |          | IB  |
|             | Macarophaeus_cultior        | MT738817 | MT651775 | Mac |
|             | Macarophaeus_varius         | MT738819 | MT651815 | Mac |
|             | Micaria_albovittata         | MH630610 | MT651853 | IB  |
|             | Micaria_brignolii           | MH630616 | MT651890 | IB  |
|             | Micaria_fulgens             | MH630627 | MT651923 | IB  |
|             | Micaria_guttigera           | MH630653 | MT651736 | IB  |
|             | Nomisio_celerrima           | MT607832 | MT651643 | IB  |
|             | Nomisio_Gnaphosidae29       | MT607831 | MT651910 | IB  |
|             | Poecilochroa_albomaculata   | MT607881 | MT651851 | IB  |
|             | Poecilochroa_variana        | MT607882 |          | IB  |
|             | Pterotricha_simoni          | MT607887 | MT651826 | IB  |
|             | Scotophaeus_blackwalli      | MH630921 | MT651960 | IB  |
|             | Scotophaeus_validus         | MH630927 | MT651686 | IB  |
|             | Setaphis_carmeli            | MT607901 | MT651958 | IB  |
|             | Trachyzelotes_mutabilis     | MT607926 |          | IB  |
|             | Trachyzelotes_pedestris     | MT607927 | MT652050 | IB  |
|             | Zelotes_flagellans          | MT607943 | MT651834 | IB  |
|             | Zelotes_gallicus            | MT607944 | MT651964 | IB  |
|             | Zelotes_manius              | MT607945 | MT651631 | IB  |
|             | Zelotes_tenuis              | MT607946 | MT651961 | IB  |
|             | Zelotes_thorelli            | MT607947 | MT651646 | IB  |
| Hahniidae   | Hahnia_helveola             | MT607759 | MT651663 | IB  |

|              |                              |          |          |     |
|--------------|------------------------------|----------|----------|-----|
|              | Hahnia_nava                  | MT607760 | MT651840 | IB  |
|              | Hahnia_ononidum              | MT607761 | MT652035 | IB  |
|              | Hahnia_petrobia              | MT607762 | MT651727 | IB  |
|              | Iberina_montana              | MT607782 | MT651679 | IB  |
|              | Mastigusa_arietina           | MT607807 |          | IB  |
| Hersiliidae  | Tama_edwardsi                | MT607907 | MT651822 | IB  |
| Leptonetidae | Leptoneta_paroculus          | MT607793 | MT651622 | IB  |
| Linyphiidae  | Acorigone_acoreensis         | MT738759 | MT652076 | Mac |
|              | Agyneta_decora               | MT738760 | MT651810 | Mac |
|              | Agyneta_fuscipalpa           | MH630470 | MT651903 | IB  |
|              | Agyneta_orites               | MH630473 | MT651907 | IB  |
|              | Agyneta_pseudorurestris      | MH630478 | MT651905 | IB  |
|              | Agyneta_rurestris            | MH630487 | MT651904 | IB  |
|              | Agyneta_simplicitarsis       | MH630489 | MT651906 | IB  |
|              | Bordea_negrei                | MT607680 | MT652053 | IB  |
|              | Canariellatum_albidum        | MT738765 | MT651740 | Mac |
|              | Canariellatum_sp             | MT738766 | MT651768 | Mac |
|              | Canariphantes_acoreensis     | MT738764 | MT652090 | Mac |
|              | Canariphantes_zonatus        | MT607683 | MT652007 | IB  |
|              | Centromerus_pabulator        | MT607684 | MT651721 | IB  |
|              | Centromerus_prudens          | MT607685 | MT651722 | IB  |
|              | Centromerus_sellarius        | MT607686 | MT651723 | IB  |
|              | Centromerus_variegatus       | MT738767 | MT652077 | Mac |
|              | Ceratinella_scabrosa         | MT607687 | MT652019 | IB  |
|              | Ceratinopsis_acripes         | MT738768 | MT652079 | Mac |
|              | Ceratinopsis_infusata        | MT738769 | MT652082 | Mac |
|              | Ceratinopsis_sp1             | MT738770 | MT651779 | Mac |
|              | Ceratinopsis_sp2             | MT738771 | MT651769 | Mac |
|              | Ceratinopsis_sp3             | MT738772 | MT651759 | Mac |
|              | Diplocephalus_picinus        | MT607711 | MT651628 | IB  |
|              | Entelecara_acuminata         | MT607731 | MT651712 | IB  |
|              | Entelecara_schmitzi          | MT738798 | MT651781 | Mac |
|              | Erigone_atra                 | MT738800 | MT651738 | Mac |
|              | Erigone_autumnalis           | MT738801 | MT652086 | Mac |
|              | Erigone_dentipalpis          | MT607741 | MT652010 | IB  |
|              | Frontinellina_dearmata       | MT738804 | MT651777 | Mac |
|              | Frontinellina_frutetorum     | MT607754 | MT651974 | IB  |
|              | Frontiphantes_fulgurenotatus | MT738805 | MT651758 | Mac |
|              | Gonatium_rubens              | MT607757 | MT651714 | IB  |
|              | Gongylidiellum_murcidum      | MT607758 | MT652031 | IB  |
|              | Improphantes_furcabilis      | MT738808 | MT652055 | Mac |
|              | Improphantes_multidentatus   | MT738809 | MT651747 | Mac |
|              | Improphantes_sp              | MT738810 | MT651800 | Mac |
|              | Labulla_flahaulti            | MT607785 | MT651706 | IB  |
|              | Lepthyphantes_mauli          | MT738814 | MT651761 | Mac |
|              | Lepthyphantes_minutus        | MT607791 | MT651704 | IB  |
|              | Lessertia_dentichelis        | MT607794 | MT652024 | IB  |
|              | Linyphia_hortensis           | MT607796 | MT651732 | IB  |

|                              |            |            |     |
|------------------------------|------------|------------|-----|
| Linyphiidae5                 | MT607797   | MT651702   | IB  |
| Maso_sundevalli              | MT607806   | MT652016   | IB  |
| Megalephyphantes_collinus    | MH630598   | MT651648   | IB  |
| Mermessus_bryantae           | MT738820   | MT651811   | Mac |
| Metopobactrus_prominulus     | MH630603   | MT652017   | IB  |
| Micrargus_apertus            | MT607813   | MT652011   | IB  |
| Micrargus_laudatus           | MT607814   | MT652012   | IB  |
| Microctenonyx_subitaneus     | MT607815   | MT652034   | IB  |
| Microlinyphia_johnsoni       | MT738824   | MT652075   | Mac |
| Microlinyphia_pusilla        | MT607816   | MT651691   | IB  |
| Microneta_viaria             | MT607819   | MT652020   | IB  |
| Midia_midas                  | MH630657   | MT651705   | IB  |
| Minicia_floresensis          | MT738825   | MT651796   | Mac |
| Minicia_gomerae              | MT738826   | MT651755   | Mac |
| Minicia_marginella           | MT607821   | MT651713   | IB  |
| Minicia_teneriffensis        | MT738827   | MT652066   | Mac |
| Monocephalus_fuscipes        | MT607823   | MT652028   | IB  |
| Neriene_clathrata            | MT607828   | MT651690   | IB  |
| Neriene_peltata              | MT607829   | MT651901   | IB  |
| Neriene_radiata              | MT607830   | MT651863   | IB  |
| Obscuriphantes_obscurus      | MT607834   | MT651703   | IB  |
| Oedothorax_apicatus          | MT607836   | MT652030   | IB  |
| Oedothorax_fuscus            | MT607837   | MT651724   | IB  |
| Palliduphantes_cernuus       | MT607850   | MT651709   | IB  |
| Palliduphantes_Linyphiidae20 | MT607849   | MT651708   | IB  |
| Palliduphantes_rubens        | MT738834   |            | Mac |
| Palliduphantes_schmitzi      | MT738835   | MT651793   | Mac |
| Parapelecopsis_nemoralis     | MT607853   | MT652013   | IB  |
| Pelecopsis_bucephala         |            | MT651830   | IB  |
| Pelecopsis_mosantensis       | MT607859   | MT651625   | IB  |
| Piniphantes_pinicola         | MT607875   | MT651710   | IB  |
| Pocadicnemis_junceae         | MH630890   | MT652015   | IB  |
| Pocadicnemis_pumila          | MH630898   | MT652014   | IB  |
| Porrhomma_borgesi            | MT738842   | MT651739   | Mac |
| Prinerigone_vagans           | MT607884   | MT652009   | IB  |
| Savigniorhipis_acoreensis    | MT738849   | MT651790   | Mac |
| Stemonyphantes_lineatus      | KY268612.1 | FJ838738.1 | IB  |
| Styloctetor_romanus          | MT607905   | MT651720   | IB  |
| Tapinocyba_affinis           | MH630929   | MT652026   | IB  |
| Tapinocyba_mitis             | MH630934   | MT652025   | IB  |
| Tenuiphantes_canariensis     | MT738857   | MT651805   | Mac |
| Tenuiphantes_flavipes        | MT607908   | MT652006   | IB  |
| Tenuiphantes_herbicola       | MT607909   | MT651825   | IB  |
| Tenuiphantes_miguelensis     | MT738858   | MT651792   | Mac |
| Tenuiphantes_tenebricoloides | MT738859   | MT651765   | Mac |
| Tenuiphantes_tenuis          | MT607910   | MT652005   | IB  |
| Theonina_cornix              | MT607918   | MT651833   | IB  |
| Tiso_vagans                  | MT607920   | MT652027   | IB  |

|             |                           |            |             |     |
|-------------|---------------------------|------------|-------------|-----|
|             | Trichoncus_affinis        | MT607928   | MT652018    | IB  |
|             | Turinyphia_maderiana      | MT738864   | MT652080    | Mac |
|             | Typhochrestus_bogarti     | MT607931   | MT651715    | IB  |
|             | Walckenaeria_acuminata    | MH630965   | MT651717    | IB  |
|             | Walckenaeria_afur         | MT738865   | MT652067    | Mac |
|             | Walckenaeria_alba         | MT738866   | MT652065    | Mac |
|             | Walckenaeria_antica       | MH630966   | MT652023    | IB  |
|             | Walckenaeria_corniculans  | MH630977   | MT652022    | IB  |
|             | Walckenaeria_dalmasi      | MH630983   | MT651719    | IB  |
|             | Walckenaeria_dysderioides | MH630987   | MT651716    | IB  |
|             | Walckenaeria_gomerensis   | MT738867   | MT651742    | Mac |
|             | Walckenaeria_grandis      | MT738868   | MT651807    | Mac |
|             | Walckenaeria_incisa       | MH630989   | MT651718    | IB  |
|             | Walckenaeria_sp           | MT738869   | MT652085    | Mac |
|             | Walckenaeria_unicornis    | MH630990   | MT652021    | IB  |
| Liocranidae | Agroeca_inopina           | MT607655   | MT651637    | IB  |
|             | Agroeca_Liocranidae41     | MT607654   | MT651635    | IB  |
|             | Apostenus_annulipedes     | MT738762   | MT652064    | Mac |
|             | Liocranum_Liocranidae38   | MT607798   | MT651817    | IB  |
|             | Liocranum_majus           | MT607799   | MT651666    | IB  |
|             | Liocranum_rupicola        | MT607800   | MT651915    | IB  |
|             | Mesiotelus_mauritanicus   | MT607808   | MT651864    | IB  |
|             | Mesiotelus_tenuissimus    | MT607809   | MT651667    | IB  |
|             | Scotina_celans            | MT607894   | MT651633    | IB  |
|             | Scotina_palliardi         | MT607895   | MT651957    | IB  |
| Lycosidae   | Alopecosa_accentuata      | MT607656   | MT652049    | IB  |
|             | Alopecosa_albofasciata    | MT607657   | MT651898    | IB  |
|             | Alopecosa_cuneata         | MT607658   | MT651841    | IB  |
|             | Alopecosa_gomerae         | MT738761   | MT651746    | Mac |
|             | Alopecosa_pulverulenta    | MT607659   | MT651899    | IB  |
|             | Alopecosa_simoni          | MT607660   | MT651730    | IB  |
|             | Arctosa_lacustris         | MT607673   | MT652000    | IB  |
|             | Arctosa_personata         | MT607674   | MT652001    | IB  |
|             | Arctosa_variana           | MT607675   | MT651699    | IB  |
|             | Arctosa_villica           | MT607676   | MT651700    | IB  |
|             | Aulonia_albimana          | MT607678   | MT651998    | IB  |
|             | Pardosa_acorensis         | MT738836   | MT651788    | Mac |
|             | Pardosa_bifasciata        | MT607855   | MT652044    | IB  |
|             | Pardosa_lugubris          | MT607856   | MT651661    | IB  |
|             | Pardosa_nigriceps         | MT607857   | MT651900    | IB  |
|             | Pardosa_proxima           | MT607858   | MT651895    | IB  |
|             | Pardosa_pullata           | KY270438.1 |             | IB  |
|             | Pirata_piraticus          | MT607876   | MT651729    | IB  |
|             | Piratula_latitans         | MT607877   | MF410708.1* | IB  |
|             | Trabea_cazorla            | MT607925   | MT651997    | IB  |
|             | Trochosa_robusta          | MT607929   | MT651897    | IB  |
|             | Trochosa_terricola        | MT607930   | MT651896    | IB  |
|             | Xerolycosa_nemoralis      | MT607933   | MT652002    | IB  |

|               |                             |          |             |     |
|---------------|-----------------------------|----------|-------------|-----|
| Mimetidae     | Ero_aphana                  | MT607742 | MT651981    | IB  |
|               | Ero_cambridgei              | MT738802 | MT652070    | Mac |
|               | Ero_furcata                 | MT738803 | MT651787    | Mac |
|               | Ero_tuberculata             | MT607743 | MT651693    | IB  |
|               | Mimetus_laevigatus          | MT607820 | MT652042    | IB  |
| Miturgidae    | Zora_manicata               | MT607956 | MT651937    | IB  |
|               | Zora_pardalis               | MT607957 | MT651673    | IB  |
|               | Zora_silvestris             | MT607958 | MT651856    | IB  |
|               | Zora_spinimana              | MT607959 | MT651935    | IB  |
| Mysmenidae    | Mysmenidae26                | MT607824 | MT651634    | IB  |
|               | Trogloneta_madeirensis      | MT738863 | MT651767    | Mac |
| Nemesiidae    | Nemesia_Nemesiidae14        | MT607825 | KX418149.1* | IB  |
| Oecobiidae    | Oecobius_machadoi           | MT607835 | FJ607540.1* | IB  |
|               | Oonops_Oonopidae17          | MT607839 | MT651869    | IB  |
|               | Oonops_Oonopidae22          |          | MT651653    | IB  |
|               | Oonops_Oonopidae44          | MT607840 |             | IB  |
|               | Oonops_pulcher              | MT607842 | MT651652    | IB  |
|               | Oonops_sp                   | MT607841 | MT651875    | IB  |
|               | Orchestina_Oonopidae34      | MT607843 |             | IB  |
|               | Oxyopes_heterophthalmus     | MT607844 | MT651735    | IB  |
| Oxyopidae     | Oxyopes_lineatus            | MT607845 | MT651662    | IB  |
|               | Oxyopes_nigripalpis         | MT607846 | MT651902    | IB  |
| Palpimanidae  | Palpimanus_gibbulus         | MT607851 | MT651733    | IB  |
| Philodromidae | Philodromus_albidus         | MH630699 | MT651836    | IB  |
|               | Philodromus_aureolus        | MH630715 | MT651939    | IB  |
|               | Philodromus_buchari         | MH630730 | MT651675    | IB  |
|               | Philodromus_buxi            | MH630743 | MT651941    | IB  |
|               | Philodromus_dispar          | MH630768 | MT651938    | IB  |
|               | Philodromus_emarginatus     | MH630787 | MT651645    | IB  |
|               | Philodromus_fuscolimbatus   | MH630792 | MT651942    | IB  |
|               | Philodromus_insulanus       | MT738837 | MT651782    | Mac |
|               | Philodromus_lividus         | MH630851 | MT651677    | IB  |
|               | Philodromus_Philodromidae18 | MH630695 | MT651674    | IB  |
|               | Philodromus_pinetorum       | MH630870 | MT651676    | IB  |
|               | Philodromus_praedatus       | MH630871 | MT651940    | IB  |
|               | Philodromus_rufus           | MH630886 | MT651731    | IB  |
|               | Pulchellodromus_bistigma    | MH630906 | MT651936    | IB  |
|               | Pulchellodromus_glaucus     | MH630913 | MT651678    | IB  |
|               | Pulchellodromus_pulchellus  | MH630914 | MT651934    | IB  |
|               | Pulchellodromus_simoni      | MH630916 | MT651641    | IB  |
|               | Pulchellodromus_wunderlichi | MT738844 | MT651808    | Mac |
|               | Thanatus_atratus            | MH630942 | MT651956    | IB  |
|               | Thanatus_oblongiusculus     | MH630950 | MT651865    | IB  |
|               | Thanatus_vulgaris           | MH630954 | MT651842    | IB  |
|               | Tibellus_oblongus           | MH630961 | MT651967    | IB  |
| Pholcidae     | Holocnemus_caudatus         | MT607778 | MT651651    | IB  |
|               | Holocnemus_hispanicus       | MT607779 | MT651867    | IB  |
|               | Pholcus_gomerae             | MT738838 | MT651814    | Mac |

|                |                                |          |          |     |
|----------------|--------------------------------|----------|----------|-----|
|                | Pholcus_madeirensis            | MT738839 | MT651780 | Mac |
|                | Pholcus_opilionoides           | MT607863 | MT652038 | IB  |
|                | Pholcus_sveni                  | MT738840 |          | Mac |
|                | Spermophorides_gomerensis      | MT738850 | MT652073 | Mac |
|                | Spermophorides_heterogibbifera | MT738851 | MT651752 | Mac |
|                | Spermophorides_mercedes        | MT738852 | MT652063 | Mac |
| Phrurolithidae | Liophrurillus_flavitarsis      | MT607801 | MT651845 | IB  |
|                | Phrurolinillus_lisboensis      | MT607865 | MT651947 | IB  |
|                | Phrurolinillus_tibialis        | MT607866 | MT651914 | IB  |
|                | Phrurolithus_festivus          | MT607868 | MT651912 | IB  |
|                | Phrurolithus_minimus           | MT607869 | MT651913 | IB  |
|                | Phrurolithus_nigrinus          | MT607867 | MT651665 | IB  |
|                | Phrurolithus_szilyi            | MT607870 |          | IB  |
| Pimoidae       | Pimoida_breuii                 | MT607874 | MT651647 | IB  |
| Pisauridae     | Cladycnis_insignis             | MT738776 | MT651754 | Mac |
|                | Pisaura_acoreensis             | MT738841 | MT651795 | Mac |
|                | Pisaura_mirabilis              | MT607878 | MT651670 | IB  |
| Salticidae     | Aelurillus_luctuosus           | MT607653 | MT652054 | IB  |
|                | Attulus_pubescens              | MT607903 | MT651682 | IB  |
|                | Ballus_chalybeius              | MT607679 | MT651680 | IB  |
|                | Chalcoscirtus_alpicola         | MT607689 | MT651636 | IB  |
|                | Chalcoscirtus_infimus          | MT607690 | MT651844 | IB  |
|                | Euophrys_frontalis             | MT607745 | MT651726 | IB  |
|                | Euophrys_herbigrada            | MT607746 | MT651921 | IB  |
|                | Euophrys_Salticidae30          | MT607744 | MT651918 | IB  |
|                | Evarcha_arcuata                | MT607751 | MT651946 | IB  |
|                | Evarcha_falcata                | MT607752 | MT651968 | IB  |
|                | Evarcha_jucunda                | MT607753 | MT652045 | IB  |
|                | Heliophanus_cupreus            | MT607774 | MT651954 | IB  |
|                | Heliophanus_Salticidae24       | MT607773 | MT651672 | IB  |
|                | Heliophanus_tribulosus         | MT607775 | MT651671 | IB  |
|                | Iberattus_semiglabratus        | MT607747 | MT651681 | IB  |
|                | Icius_hamatus                  | MT607783 | MT651951 | IB  |
|                | Macaroides_cata                | MT738816 | MT651791 | Mac |
|                | Macaroides_diligens            | MT738818 | MT651770 | Mac |
|                | Macaroides_nidicolens          | MT607803 | MT651857 | IB  |
|                | Neon_acoreensis                | MT738829 | MT651737 | Mac |
|                | Pellenes_nigrociliatus         | MT607860 | MT651824 | IB  |
|                | Phlegma_fasciata               | MT607861 | MT651839 | IB  |
|                | Pseudeuophrys_erratica         | MT607885 | MT651919 | IB  |
|                | Pseudeuophrys_nebrodensis      | MT607886 | MT651920 | IB  |
|                | Salticus_scenicus              | MT607891 | MT651687 | IB  |
|                | Salticus_zebraneus             | MT607892 | MT651819 | IB  |
| Scytodidae     | Scytodes_velutina              | MT607896 | MT652037 | IB  |
| Segestriidae   | Segestria_bavarica             | MT607897 | MT651654 | IB  |
|                | Segestria_florentina           | MT607898 | MT651655 | IB  |
|                | Segestria_senoculata           | MT607899 | MT651870 | IB  |
| Sicariidae     | Loxosceles_rufescens           | MT607802 | MT651881 | IB  |



|                |                                 |          |          |     |
|----------------|---------------------------------|----------|----------|-----|
| Sparassidae    | Eusparassus_dufouri             | MT607750 | MT652029 | IB  |
|                | Micrommata_aljibica             | MT607817 | MT651999 | IB  |
|                | Micrommata_virescens            | MT607818 | MT651838 | IB  |
|                | Olios_argelasius                | MT607838 | MT651854 | IB  |
|                | Olios_canariensis               | MT738832 | MT651753 | Mac |
| Tetragnathidae | Meta_menardi                    | MT607810 | MT651982 | IB  |
|                | Meta_stridulans                 | MT738823 | MT651764 | Mac |
|                | Metellina_mengei                | MT607811 | MT651695 | IB  |
|                | Metellina_merianae              | MT607812 | MT651694 | IB  |
|                | Metellina_minima                | MT738821 | MT651743 | Mac |
|                | Metellina_sp                    | MT738822 | MT651813 | Mac |
|                | Sancus_acoreensis               | MT738848 | MT651789 | Mac |
|                | Tetragnatha_extensa             | MT607911 | MT651649 | IB  |
|                | Tetragnatha_montana             | MT607912 | MT651688 | IB  |
|                | Tetragnatha_obtusa              | MT607913 | MT651847 | IB  |
|                | Tetragnatha_pinicola            | MT607914 | MT651711 | IB  |
| Theridiidae    | Anelosimus_vittatus             | MT607663 | MT651623 | IB  |
|                | Asagena_phalerata               | MT607677 | MT651985 | IB  |
|                | Crustulina_guttata              | MT607707 | MT651696 | IB  |
|                | Cryptachaea_blattea             | MT738779 | MT652083 | Mac |
|                | Dipoena_erythropus              | MT607712 | MT651988 | IB  |
|                | Dipoena_melanogaster            | MT607713 | MT652041 | IB  |
|                | Dipoena_nigroreticulata         | MT607714 | MT651987 | IB  |
|                | Dipoena_torva                   | MT607715 | MT651816 | IB  |
|                | Dipoena_umbratilus              | MT607716 | MT651888 | IB  |
|                | Echinotheridion_gibberosum      | MT738796 | MT652078 | Mac |
|                | Enoplognatha_sattleri           | MT738797 | MT651812 | Mac |
|                | Enoplognatha_thoracica          | MT607730 | MT651916 | IB  |
|                | Episinus_algiricus              | MT607732 | MT652039 | IB  |
|                | Episinus_maculipes              | MT607733 | MT652040 | IB  |
|                | Episinus_maderianus             | MT738799 | MT652069 | Mac |
|                | Episinus_theridioides           | MT607734 | MT652043 | IB  |
|                | Episinus_truncatus              | MT607735 | MT651832 | IB  |
|                | Euryopis_flavomaculata          | MT607748 | MT651990 | IB  |
|                | Euryopis_sexalbomaculata        | MT607749 | MT651868 | IB  |
|                | Heterotheridion_nigrovariegatum | MT607777 | MT651994 | IB  |
|                | Kochiura_aulica                 | MT607784 | MT651821 | IB  |
|                | Lasaeola_convexa                | MT607789 | MT651889 | IB  |
|                | Lasaeola_oceanica               | MT738811 | MT651794 | Mac |
|                | Lasaeola_Theridiidae23          | MT607787 | MT651991 | IB  |
|                | Lasaeola_Theridiidae36          | MT607788 | MT651728 | IB  |
|                | Lasaeola_tristis                | MT607790 | MT651980 | IB  |
|                | Macaridion_barreti              | MT738815 | MT652068 | Mac |
|                | Neottiura_bimaculata            | MT607827 | MT651993 | IB  |
|                | Paidiscura_orotavensis          | MT738833 | MT651774 | Mac |
|                | Paidiscura_pallens              | MT607848 | MT651860 | IB  |
|                | Parasteatoda_lunata             | MT607854 | MT651984 | IB  |
|                | Pholcomma_gibbum                | MT607862 | MT651697 | IB  |

|            |                         |          |          |     |
|------------|-------------------------|----------|----------|-----|
| Thomisidae | Phoroncidia_paradoxa    | MT607864 | MT651624 | IB  |
|            | Phycosoma_inornatum     | MT607871 | MT652047 | IB  |
|            | Phylloneta_impressa     | MT607872 | MT651986 | IB  |
|            | Phylloneta_sisyphia     | MT607873 | MT651992 | IB  |
|            | Platnickina_tincta      | MT607880 | MT651977 | IB  |
|            | Rhomphaea_nasica        | MT738845 | MT651785 | Mac |
|            | Robertus_arundineti     | MT607889 | MT651650 | IB  |
|            | Rugathodes_acoreensis   | MT738846 | MT652089 | Mac |
|            | Rugathodes_madeirensis  | MT738847 | MT651778 | Mac |
|            | Sardinidion_blackwalli  | MT607893 | MT651971 | IB  |
|            | Simitidion_simile       | MT607902 | MT651976 | IB  |
|            | Steatoda_nobilis        | MT738853 | MT651797 | Mac |
|            | Steatoda_sp             | MT738854 | MT652058 | Mac |
|            | Steatoda_triangularis   | MT607904 | MT651989 | IB  |
|            | Theridion_harmsi        | MT215627 | MT651979 | IB  |
|            | Theridion_melanurum     | MT738860 | MT652084 | Mac |
|            | Theridion_musivivum     | MT738861 | MT651763 | Mac |
|            | Theridion_mystaceum     | MT215687 | MT651692 | IB  |
|            | Theridion_nsp89         | MT738862 | MT651784 | Mac |
|            | Theridion_pinastri      | MT215698 | MT651975 | IB  |
|            | Theridion_promiscuum    | MT215601 | MT651978 | IB  |
|            | Theridion_Theridiidae15 | MT215605 | MT651972 | IB  |
|            | Theridion_varians       | MT215701 | MT651973 | IB  |
|            | Cozyptila_blackwalli    | MT607706 |          | IB  |
|            | Diaea_dorsata           | MT607710 | MT651886 | IB  |
|            | Heriaeus_oblongus       | MT607776 | MT651632 | IB  |
|            | Misumena_spinifera      | MT738828 | MT651773 | Mac |
|            | Misumena_vatia          | MT607822 | MT651932 | IB  |
|            | Ozyptila_atomaria       | MT607847 |          | IB  |
|            | Pistius_truncatus       | MT607879 | MT651933 | IB  |
|            | Psammitis_ninnii        | MT607942 | MT652051 | IB  |
|            | Runcinia_grammica       | MT607890 | MT651926 | IB  |
|            | Synema_globosum         | MT607906 | MT651668 | IB  |
|            | Thomisus_onustus        | MT607919 | MT651887 | IB  |
|            | Tmarus_punctatissimus   | MT607922 | MT651930 | IB  |
|            | Tmarus_staintoni        | MT607923 | MT651931 | IB  |
|            | Tmarus_stellio          | MT607924 | MT651846 | IB  |
|            | Xysticus_audax          | MT607936 | MT651884 | IB  |
|            | Xysticus_canariensis    | MT738870 | MT651741 | Mac |
|            | Xysticus_cor            | MT738871 | MT652088 | Mac |
|            | Xysticus_cristatus      | MT607937 | MT651658 | IB  |
|            | Xysticus_erraticus      | MT607938 | MT651883 | IB  |
|            | Xysticus_ferrugineus    | MT607939 | MT651629 | IB  |
|            | Xysticus_kempeleni      | MT607940 | MT651882 | IB  |
|            | Xysticus_lanio          | MT607941 | MT651858 | IB  |
|            | Xysticus_sp             | MT738872 | MT652071 | Mac |
|            | Xysticus_Thomisidae31   | MT607935 |          | IB  |
|            | Xysticus_Thomisidae42   | MT607934 | MT651885 | IB  |

|              |                           |          |           |     |
|--------------|---------------------------|----------|-----------|-----|
| Titanoecidae | Titanoeca_schineri        | MT607921 | MT651859  | IB  |
| Uloboridae   | Hyptiotes_flavidus        | MT607781 | MT651642  | IB  |
|              | Polenecia_producta        | MT607883 | MT651707  | IB  |
|              | Uloborus_walckenaerius    | MT607932 | MT651995  | IB  |
| Zodariidae   | Amphiledorus_Zodariidae28 | MT607661 | MT651664* | IB  |
|              | Amphiledorus_Zodariidae40 | MT607662 | MT651664  | IB  |
|              | Selamia_reticulata        | MT607900 | MT651909  | IB  |
|              | Zodarion_alacre           | MT607949 | MT651850  | IB  |
|              | Zodarion_beticum          | MT607950 | MT651893  | IB  |
|              | Zodarion_fuscum           | MT607951 | MT651891  | IB  |
|              | Zodarion_marginiceps      | MT607952 | MT651659  | IB  |
|              | Zodarion_modestum         | MT607953 | MT651894  | IB  |
|              | Zodarion_rudyi            | MT607954 | MT651660  | IB  |
|              | Zodarion_styliferum       | MT607955 | MT651892  | IB  |
| Zoropsidae   | Zoropsis_media            | MT607960 | MT651862  | IB  |
|              | Zoropsis_rufipes          | MT738873 | MT652057  | Mac |
|              | Zoropsis_sp               | MT738874 | MT651806  | Mac |

**Table S2.** Taxa added to the backbone matrix, including GenBank accession numbers of the transcriptomes and of every gene, or F if the gene sequence was extracted from the transcriptomes by Fernandez et al (2018). \*Indicates BOLD accession number.

| Family            | Species                         | c1           | 16s        | 12s        | 28s        | 18s        | H3         | Transcriptome |
|-------------------|---------------------------------|--------------|------------|------------|------------|------------|------------|---------------|
| Anapidae          | <i>Spinanapis</i> sp.           | F            |            |            | F          | F          |            | SRR6998907    |
| Araneidae         | <i>Macracantha arcuata</i>      | F            | F          | F          | F          | F          | F          | SRR1048826    |
|                   | <i>Verrucosa arenata</i>        | KP656811.1   | FJ525364.1 |            | FJ525382.1 | FJ525401.1 | FJ525346.1 | SRR3144087    |
| Caponiidae        | <i>Calponia</i> sp.             | KX514685.1   | KX514518.1 |            | KX514633.1 | KX514574.1 | KX298958.1 | SRR3144089    |
| Corinnidae        | <i>Nyssus</i> sp.               | F            | F          | F          | KY016974.1 | F          |            | SRR6998658    |
| Dipluridae        | <i>Microhexura montivaga</i>    | KR607977.1   | F          | F          | F          | F          | F          | SRR1514890    |
| Gnaphosidae       | <i>Anzacia</i> sp.              | F            | F          | F          | F          |            | F          | SRR6997629    |
|                   | <i>Sergiolus capulatus</i>      | MG046446.1   | F          | F          | F          | F          | F          | SRR1514903    |
| Gradungulidae     | <i>Pianoa isolata</i>           | F            | F          | F          | F          | F          | F          | SRR6998914    |
|                   | <i>Progradungula otwayensis</i> | F            |            | F          | F          | F          | F          | SRR6998916    |
| Hersiliidae       | <i>Tamopsis</i> sp.             | VAQT1146-10* | F          | F          | F          | F          | F          | SRR6998917    |
| Linyphiidae       | <i>Laminacauda parvipalpis</i>  | F            | F          | F          | F          | F          | F          | SRR6997873    |
| Macrothelidae     | <i>Macrothele calpeiana</i>     | KX538935.1   | EF127290.1 |            | KJ628318.1 | F          | F          | SRR6994009    |
| Malkaridae        | <i>Perissopmeros</i> sp.        | KM486464.1   | F          | F          | F          | F          | F          | SRR6998657    |
| Megahexuridae     | <i>Megahexura fulva</i>         | F            | F          | F          | F          | F          | F          | SRR1514891    |
| Mysmenidae        | <i>Microdipoena guttata</i>     | F            |            |            | F          | F          | F          | SRR6998907    |
| Nemesiidae        | <i>Damarchus</i> sp.            | F            | F          |            | F          | F          | F          | SRR3144092    |
|                   | <i>Pionothele n. sp.</i>        | F            | F          | F          | F          | F          | F          | SRR1514906    |
|                   | <i>Stanwellia</i> sp.           | F            | F          |            | F          | F          | F          | SRR6997603    |
| Orsolobidae       | <i>Maoriata</i> sp.             | KX514692.1   | KX514524.1 |            | F          | KX514581.1 | KX298965.1 | SRR6997868    |
| Physoglenidae     | <i>Runga</i> sp.                | KM486467.1   | F          | F          | KM486405.1 | F          | F          | SRR6998910    |
| Pisauridae        | <i>Pisaurina mira</i>           | MG046791.1   | F          | F          | KY017304.1 | F          | F          | SRR1365651    |
| Porrhothelidae    | <i>Porrhothele</i> sp.          | MG432439.1   |            | F          | DQ639875.1 | F          | F          | SRR6997604    |
| Salticidae        | <i>Habronattus signatus</i>     | F            | F          | F          | F          | F          | F          | SRR1514888    |
| Selenopidae       | <i>Karaops raveni</i>           | F            | F          | F          | F          | F          | F          | SRR6997858    |
| Synaphridae       | <i>Cepheia longiseta</i>        | KT580803.1   |            |            | KT580802.1 | F          | F          | SRR6997742    |
| Theraphosidae     | <i>Trichopelma laselva</i>      | F            | F          |            | F          | F          | F          | SRR1514881    |
| Theridiosomatidae | <i>Baalzebub</i> sp.            | F            | F          | F          | F          | F          | F          | SRR6997748    |
| Thomisidae        | <i>Misumenoides</i> sp.         | MG047175.1   |            |            | KM225074.1 |            | KM225226.1 | SRR3144080    |
| Uloboridae        | <i>Philoponella prominens</i>   | JN817082.1   |            | KM486257.1 | JN816882.1 | JN816670.1 |            | SRR6998657    |
|                   | <i>Zosis</i> sp.                | KX055203.1   | AF145268.1 | AF145034.1 |            |            | KM486529.1 | SRR6998924    |
| Zodariidae        | <i>Forsterella</i> sp.          | F            | F          | F          | F          | F          | F          | SRR6997864    |

**Table S3.** Taxa and genetic markers included in the backbone matrix (Wheeler, et al, 2016).

| Family        | Species                         | c1 | 16s | 12s | 28s | 18s | H3 |
|---------------|---------------------------------|----|-----|-----|-----|-----|----|
| Actinopodidae | <i>Actinopus sp.</i>            | ✓  | ✓   | ✓   | ✓   | ✓   | ✓  |
|               | <i>Missulena sp.</i>            | ✓  | ✓   | ✓   | ✓   |     |    |
| Agelenidae    | <i>Agelena labyrinthica</i>     | ✓  | ✓   |     | ✓   | ✓   |    |
|               | <i>Agelenopsis aperta</i>       | ✓  | ✓   |     | ✓   | ✓   | ✓  |
|               | <i>Agelenopsis pensylvanica</i> | ✓  | ✓   | ✓   | ✓   | ✓   | ✓  |
|               | <i>Allagelena difficilis</i>    | ✓  | ✓   | ✓   | ✓   | ✓   |    |
|               | <i>Barronopsis barrowsi</i>     | ✓  | ✓   |     | ✓   | ✓   | ✓  |
|               | <i>Draconarius sp.1</i>         | ✓  | ✓   | ✓   | ✓   | ✓   | ✓  |
|               | <i>Draconarius sp.2</i>         | ✓  | ✓   | ✓   | ✓   | ✓   | ✓  |
|               | <i>Eratigena atrica</i>         | ✓  | ✓   | ✓   | ✓   | ✓   | ✓  |
|               | <i>Hololena curta</i>           | ✓  | ✓   |     | ✓   |     |    |
|               | <i>Hololena sp.</i>             | ✓  | ✓   | ✓   | ✓   | ✓   | ✓  |
|               | <i>Pireneitega luniformis</i>   | ✓  | ✓   |     | ✓   | ✓   | ✓  |
|               | <i>Tamgrinia palpator</i>       |    | ✓   | ✓   | ✓   | ✓   |    |
|               | <i>Tegenaria domestica</i>      | ✓  | ✓   |     | ✓   | ✓   | ✓  |
|               | <i>Textrix denticulata</i>      | ✓  | ✓   |     | ✓   | ✓   | ✓  |
| Amaurobiidae  | <i>Amaurobius fenestralis</i>   | ✓  |     |     | ✓   |     |    |
|               | <i>Amaurobius sp.</i>           | ✓  | ✓   | ✓   | ✓   | ✓   | ✓  |
|               | <i>Anisacate tigrina</i>        | ✓  | ✓   | ✓   | ✓   | ✓   | ✓  |
|               | <i>Callevopsis striata</i>      | ✓  | ✓   |     | ✓   | ✓   | ✓  |
|               | <i>Callobius sp.</i>            | ✓  | ✓   | ✓   | ✓   | ✓   | ✓  |
|               | <i>Chresiona invalida</i>       |    | ✓   |     | ✓   | ✓   | ✓  |
|               | <i>Chumma inquieta</i>          | ✓  | ✓   | ✓   | ✓   | ✓   | ✓  |
|               | <i>Livius sp.</i>               | ✓  |     |     | ✓   | ✓   | ✓  |
|               | <i>Malenella nana</i>           | ✓  |     | ✓   | ✓   | ✓   | ✓  |
|               | <i>Naevius calilegua</i>        | ✓  | ✓   | ✓   | ✓   | ✓   |    |
|               | <i>Naevius sp.</i>              | ✓  | ✓   |     | ✓   | ✓   |    |
|               | <i>Pimus ivei</i>               | ✓  | ✓   | ✓   | ✓   | ✓   | ✓  |
|               | <i>Rubrius antarcticus</i>      | ✓  | ✓   | ✓   | ✓   | ✓   | ✓  |
|               | <i>Tasmarubius truncus</i>      | ✓  | ✓   |     | ✓   | ✓   |    |
|               | <i>Zanomys californica</i>      | ✓  | ✓   | ✓   | ✓   | ✓   | ✓  |
| Ammoxenidae   | <i>Ammoxenus amphalodes</i>     | ✓  | ✓   | ✓   | ✓   | ✓   | ✓  |
|               | <i>Ammoxenus cf. daedalus</i>   | ✓  |     | ✓   | ✓   |     |    |
|               | <i>Rastellus florisbad</i>      |    |     |     | ✓   | ✓   | ✓  |
| Amphinectidae | <i>Mamoea pilosa</i>            | ✓  |     | ✓   | ✓   | ✓   | ✓  |
| Anapidae      | <i>Acrobleps hygrophilus</i>    | ✓  | ✓   | ✓   | ✓   | ✓   | ✓  |
|               | <i>Anapisona kethleyi</i>       | ✓  |     |     | ✓   | ✓   | ✓  |
|               | <i>Conculus sp.</i>             | ✓  | ✓   | ✓   |     | ✓   | ✓  |
|               | <i>Crassanapis cekalovici</i>   | ✓  | ✓   |     | ✓   | ✓   | ✓  |
|               | <i>Elanapis aisen</i>           | ✓  | ✓   |     | ✓   | ✓   | ✓  |
|               | <i>Holarchaea sp.</i>           | ✓  | ✓   | ✓   | ✓   | ✓   | ✓  |
|               | <i>Maxanapis bartle</i>         | ✓  | ✓   |     | ✓   | ✓   |    |
|               | <i>Micropholcomma sp.</i>       | ✓  | ✓   |     | ✓   | ✓   | ✓  |
|               | <i>Novanapis sp.</i>            | ✓  | ✓   | ✓   | ✓   | ✓   |    |
|               | <i>Pseudanapis cf. parocula</i> |    | ✓   | ✓   | ✓   | ✓   | ✓  |
|               | <i>Raveniella peckorum</i>      | ✓  |     |     | ✓   | ✓   |    |

|                |                                |   |   |   |   |   |   |
|----------------|--------------------------------|---|---|---|---|---|---|
|                | <i>Taliniella vinki</i>        | ✓ |   |   | ✓ | ✓ |   |
|                | <i>Tasmanapis strahan</i>      |   | ✓ |   | ✓ |   | ✓ |
|                | <i>Textricella luteola</i>     | ✓ | ✓ |   | ✓ | ✓ | ✓ |
|                | <i>Unidentified Anapidae</i>   | ✓ | ✓ | ✓ | ✓ | ✓ |   |
|                | <i>Zealanapis armata</i>       |   |   |   | ✓ | ✓ |   |
| Antrodiaetidae | <i>Aliatypus sp.</i>           | ✓ | ✓ | ✓ | ✓ | ✓ |   |
|                | <i>Antrodiaetus gertschi</i>   | ✓ | ✓ | ✓ | ✓ | ✓ | ✓ |
|                | <i>Antrodiaetus sp.</i>        | ✓ | ✓ | ✓ | ✓ | ✓ |   |
|                | <i>Antrodiaetus unicolor</i>   | ✓ | ✓ | ✓ | ✓ | ✓ | ✓ |
|                | <i>Hexura picea</i>            | ✓ | ✓ | ✓ | ✓ | ✓ |   |
| Anyphaenidae   | <i>Amaurobioides africana</i>  | ✓ | ✓ | ✓ | ✓ | ✓ | ✓ |
|                | <i>Amaurobioides maritima</i>  | ✓ | ✓ | ✓ | ✓ | ✓ | ✓ |
|                | <i>Anyphaena accentuata</i>    | ✓ | ✓ | ✓ | ✓ | ✓ | ✓ |
|                | <i>Ayscha lagenifera</i>       | ✓ | ✓ |   | ✓ | ✓ | ✓ |
|                | <i>Coptoprepes campanensis</i> | ✓ |   |   | ✓ | ✓ | ✓ |
|                | <i>Ferrieria echinata</i>      | ✓ | ✓ |   | ✓ | ✓ | ✓ |
|                | <i>Gayenna americana</i>       | ✓ | ✓ | ✓ | ✓ | ✓ | ✓ |
|                | <i>Hatitia sp.</i>             | ✓ | ✓ | ✓ | ✓ | ✓ | ✓ |
|                | <i>Josa lutea</i>              | ✓ |   |   | ✓ | ✓ | ✓ |
|                | <i>Monapia dilaticollis</i>    | ✓ |   |   | ✓ | ✓ | ✓ |
|                | <i>Negayan paduana</i>         | ✓ | ✓ | ✓ | ✓ | ✓ | ✓ |
|                | <i>Oxysoma punctatum</i>       | ✓ | ✓ | ✓ | ✓ | ✓ | ✓ |
|                | <i>Oxysoma saccatum</i>        | ✓ | ✓ | ✓ | ✓ | ✓ |   |
|                | <i>Philisca huapi</i>          | ✓ | ✓ | ✓ | ✓ | ✓ | ✓ |
|                | <i>Phydile punctipes</i>       | ✓ |   | ✓ | ✓ | ✓ | ✓ |
|                | <i>Sanogasta maculatipes</i>   |   | ✓ |   | ✓ | ✓ | ✓ |
|                | <i>Tomopisthes varius</i>      | ✓ | ✓ | ✓ | ✓ | ✓ | ✓ |
|                | <i>Xiruana gracilipes</i>      | ✓ | ✓ | ✓ | ✓ | ✓ | ✓ |
| Araneidae      | <i>Araneus diadematus</i>      | ✓ | ✓ | ✓ | ✓ | ✓ | ✓ |
|                | <i>Argiope bruenicchi</i>      | ✓ | ✓ | ✓ | ✓ | ✓ | ✓ |
|                | <i>Caerostris sexcuspidata</i> | ✓ | ✓ | ✓ | ✓ | ✓ | ✓ |
|                | <i>Chorizopes nipponicus</i>   | ✓ |   |   | ✓ | ✓ |   |
|                | <i>Clitaetra episinoides</i>   | ✓ | ✓ | ✓ | ✓ | ✓ | ✓ |
|                | <i>Cyclosa bifurcata</i>       | ✓ | ✓ | ✓ |   |   |   |
|                | <i>Cyclosa conica</i>          | ✓ | ✓ | ✓ | ✓ | ✓ | ✓ |
|                | <i>Cyrtophora sp.</i>          | ✓ | ✓ | ✓ |   | ✓ | ✓ |
|                | <i>Deliochus sp.</i>           | ✓ | ✓ | ✓ | ✓ | ✓ |   |
|                | <i>Eriophora sp.</i>           | ✓ | ✓ |   | ✓ | ✓ | ✓ |
|                | <i>Eustala sp.</i>             | ✓ | ✓ |   | ✓ | ✓ | ✓ |
|                | <i>Gasteracantha sp.</i>       | ✓ | ✓ | ✓ | ✓ | ✓ | ✓ |
|                | <i>Gnolus angulifrons</i>      |   |   |   | ✓ | ✓ | ✓ |
|                | <i>Gnolus cordiformis</i>      |   | ✓ |   | ✓ | ✓ |   |
|                | <i>Herennia etruscilla</i>     | ✓ | ✓ | ✓ | ✓ | ✓ | ✓ |
|                | <i>Herennia multipuncta</i>    | ✓ | ✓ | ✓ | ✓ | ✓ | ✓ |
|                | <i>Larinioides cornutus</i>    | ✓ | ✓ | ✓ | ✓ | ✓ | ✓ |
|                | <i>Mangora maculata</i>        | ✓ | ✓ | ✓ | ✓ | ✓ | ✓ |
|                | <i>Mecynogea lemniscata</i>    | ✓ | ✓ | ✓ | ✓ | ✓ | ✓ |
|                | <i>Metepeira labyrinthea</i>   | ✓ | ✓ | ✓ | ✓ | ✓ | ✓ |

|                  |                                  |   |   |   |   |   |   |
|------------------|----------------------------------|---|---|---|---|---|---|
|                  | <i>Micrathena</i> sp.            | ✓ | ✓ |   | ✓ | ✓ | ✓ |
|                  | <i>Neoscona</i> sp.              | ✓ | ✓ | ✓ | ✓ | ✓ | ✓ |
|                  | <i>Nephila clavata</i>           | ✓ | ✓ | ✓ | ✓ | ✓ | ✓ |
|                  | <i>Nephila fenestrata</i>        | ✓ | ✓ | ✓ | ✓ | ✓ | ✓ |
|                  | <i>Nephila pilipes</i>           | ✓ | ✓ | ✓ | ✓ | ✓ | ✓ |
|                  | <i>Nephila senegalensis</i>      | ✓ | ✓ | ✓ | ✓ | ✓ | ✓ |
|                  | <i>Nephila</i> sp.               | ✓ | ✓ | ✓ | ✓ | ✓ | ✓ |
|                  | <i>Nephilengys cruentata</i>     | ✓ | ✓ | ✓ | ✓ | ✓ | ✓ |
|                  | <i>Nephilengys dodo</i>          | ✓ | ✓ | ✓ | ✓ | ✓ | ✓ |
|                  | <i>Nephilengys malabarensis</i>  | ✓ | ✓ | ✓ | ✓ | ✓ | ✓ |
|                  | <i>Nephilengys papuana</i>       | ✓ | ✓ | ✓ | ✓ | ✓ | ✓ |
|                  | <i>Nephilengys</i> sp.           | ✓ | ✓ | ✓ | ✓ | ✓ | ✓ |
|                  | <i>Oarces reticulatus</i>        | ✓ | ✓ | ✓ | ✓ | ✓ | ✓ |
|                  | <i>Perilla teres</i>             | ✓ |   | ✓ | ✓ | ✓ | ✓ |
|                  | <i>Phonognatha graeffei</i>      | ✓ | ✓ | ✓ | ✓ | ✓ | ✓ |
|                  | <i>Zygiella atrica</i>           | ✓ | ✓ | ✓ | ✓ | ✓ | ✓ |
|                  | <i>Zygiella x-notata</i>         | ✓ | ✓ | ✓ | ✓ | ✓ | ✓ |
| Archaeidae       | <i>Afrarchaea godfreyi</i>       |   | ✓ |   | ✓ | ✓ | ✓ |
|                  | <i>Afrarchaea</i> sp.            | ✓ |   |   | ✓ | ✓ | ✓ |
|                  | <i>Austrarchaea</i> sp. 1        | ✓ | ✓ | ✓ | ✓ | ✓ | ✓ |
|                  | <i>Austrarchaea</i> sp.2         | ✓ | ✓ | ✓ |   |   | ✓ |
|                  | <i>Eriauchenius</i> sp.          | ✓ | ✓ |   | ✓ | ✓ | ✓ |
|                  | <i>Eriauchenius workmani</i>     | ✓ | ✓ | ✓ | ✓ | ✓ | ✓ |
| Arkyidae         | <i>Arkys</i> sp.                 | ✓ | ✓ | ✓ | ✓ | ✓ | ✓ |
| Atracidae        | <i>Atrax robustus</i>            | ✓ | ✓ | ✓ | ✓ | ✓ | ✓ |
|                  | <i>Hadronyche</i> sp.            | ✓ | ✓ | ✓ | ✓ | ✓ | ✓ |
| Atypidae         | <i>Atypus affinis</i>            | ✓ | ✓ | ✓ | ✓ | ✓ |   |
|                  | <i>Atypus snetsingeri</i>        |   | ✓ |   | ✓ | ✓ |   |
|                  | <i>Sphodros</i> sp.              | ✓ | ✓ | ✓ | ✓ |   | ✓ |
| Austrochilidae   | <i>Austrochilus franckeii</i>    | ✓ | ✓ |   |   | ✓ |   |
|                  | <i>Austrochilus</i> sp. 1        | ✓ | ✓ | ✓ | ✓ | ✓ | ✓ |
|                  | <i>Austrochilus</i> sp.2         | ✓ | ✓ | ✓ | ✓ | ✓ | ✓ |
|                  | <i>Hickmania</i> sp.             | ✓ | ✓ | ✓ | ✓ | ✓ | ✓ |
|                  | <i>Thaيدا peculiaris</i>         | ✓ | ✓ | ✓ | ✓ | ✓ | ✓ |
| Barychelidae     | <i>Ozicrypta</i> sp.             |   |   |   | ✓ | ✓ |   |
|                  | <i>Synothele arrakis</i>         | ✓ | ✓ | ✓ | ✓ | ✓ | ✓ |
| Caponiidae       | <i>Calponia</i> sp.2             | ✓ | ✓ |   | ✓ | ✓ |   |
|                  | <i>Caponia</i> sp.               | ✓ |   |   |   | ✓ |   |
|                  | <i>Nops</i> sp.1                 |   | ✓ |   | ✓ | ✓ |   |
|                  | <i>Nops</i> sp.2                 |   | ✓ | ✓ | ✓ | ✓ | ✓ |
| Cheiracanthiidae | <i>Calamoneta</i> sp.            |   | ✓ |   |   |   | ✓ |
|                  | <i>Cheiracanthium</i> gr. turiae |   | ✓ |   | ✓ |   | ✓ |
|                  | <i>Cheiracanthium mildei</i>     | ✓ | ✓ | ✓ | ✓ | ✓ | ✓ |
|                  | <i>Cheiracanthium</i> sp.1       | ✓ | ✓ |   | ✓ | ✓ | ✓ |
|                  | <i>Cheiracanthium</i> sp.2       | ✓ | ✓ |   | ✓ | ✓ | ✓ |
|                  | <i>Cheiramiona mlawula</i>       | ✓ |   |   | ✓ | ✓ | ✓ |
|                  | <i>Eutichurus ravidus</i>        | ✓ | ✓ | ✓ | ✓ | ✓ |   |
|                  | Unidentified Cheiracanthiidae1   | ✓ | ✓ |   | ✓ | ✓ | ✓ |

|               |                                       |   |   |   |   |   |
|---------------|---------------------------------------|---|---|---|---|---|
|               | <i>Unidentified Cheiracanthiidae2</i> | ✓ |   | ✓ | ✓ | ✓ |
| Cithaeronidae | <i>Cithaeron jocqueorum</i>           | ✓ | ✓ | ✓ | ✓ | ✓ |
| Clubionidae   | <i>Carteronius sp.</i>                | ✓ | ✓ | ✓ | ✓ |   |
|               | <i>Clubiona consensa</i>              | ✓ |   | ✓ | ✓ | ✓ |
|               | <i>Clubiona huttoni</i>               | ✓ |   | ✓ | ✓ | ✓ |
|               | <i>Clubiona sp.</i>                   | ✓ | ✓ | ✓ | ✓ |   |
|               | <i>Elaver sp.</i>                     | ✓ | ✓ | ✓ | ✓ | ✓ |
|               | <i>Pristidia prima</i>                | ✓ |   | ✓ | ✓ | ✓ |
|               | <i>Pteroneta cf. saltans</i>          | ✓ | ✓ | ✓ | ✓ | ✓ |
| Corinnidae    | <i>Aetius cf. nocturnus</i>           |   |   | ✓ | ✓ | ✓ |
|               | <i>Apochinomma formicaeforme</i>      | ✓ |   | ✓ | ✓ | ✓ |
|               | <i>Cambalida cf. fulvipes</i>         |   | ✓ | ✓ | ✓ | ✓ |
|               | <i>Castianeira sp.1</i>               | ✓ | ✓ | ✓ |   | ✓ |
|               | <i>Castianeira sp.2</i>               | ✓ |   | ✓ | ✓ | ✓ |
|               | <i>Castoponera ciliata</i>            |   | ✓ |   |   | ✓ |
|               | <i>Copa longespina</i>                | ✓ | ✓ | ✓ | ✓ | ✓ |
|               | <i>Copa sp.</i>                       | ✓ | ✓ | ✓ | ✓ | ✓ |
|               | <i>Corinna nitens</i>                 |   | ✓ |   | ✓ | ✓ |
|               | <i>Corinnomma cf. severum</i>         |   |   | ✓ | ✓ | ✓ |
|               | <i>Corinnomma sp.</i>                 | ✓ |   |   | ✓ |   |
|               | <i>Falconina sp.</i>                  | ✓ | ✓ | ✓ | ✓ |   |
|               | <i>Graptartia tropicalis</i>          | ✓ | ✓ | ✓ | ✓ | ✓ |
|               | <i>Medmassa sp.</i>                   | ✓ |   | ✓ |   |   |
|               | <i>Messapus natalis</i>               |   | ✓ | ✓ | ✓ | ✓ |
|               | <i>Myrmecotypus sp.</i>               | ✓ |   | ✓ | ✓ | ✓ |
|               | <i>Olbus jaguar</i>                   | ✓ | ✓ | ✓ | ✓ | ✓ |
|               | <i>Paradiestus penicillatus</i>       | ✓ | ✓ | ✓ | ✓ | ✓ |
|               | <i>Pronophaea nitida</i>              | ✓ | ✓ | ✓ | ✓ | ✓ |
|               | <i>Pronophaea proxima</i>             | ✓ |   |   | ✓ |   |
|               | <i>Serendib volans</i>                | ✓ |   | ✓ |   |   |
|               | <i>Sphecotypus sp.</i>                | ✓ | ✓ | ✓ | ✓ | ✓ |
|               | <i>Supunna cf. picta</i>              | ✓ | ✓ | ✓ | ✓ |   |
|               | <i>Unidentified Corinnidae</i>        | ✓ | ✓ | ✓ | ✓ | ✓ |
| Ctenidae      | <i>Anahita sp.</i>                    | ✓ | ✓ | ✓ | ✓ | ✓ |
|               | <i>Ancylometes bogotensis</i>         | ✓ | ✓ | ✓ | ✓ | ✓ |
|               | <i>Ctenus crulsi</i>                  | ✓ | ✓ | ✓ | ✓ | ✓ |
|               | <i>Ctenus sp.1</i>                    | ✓ | ✓ | ✓ | ✓ | ✓ |
|               | <i>Ctenus sp.2</i>                    | ✓ | ✓ | ✓ | ✓ | ✓ |
|               | <i>Phoneutria fera</i>                | ✓ | ✓ | ✓ | ✓ | ✓ |
|               | <i>Unidentified Ctenidae</i>          | ✓ |   | ✓ | ✓ | ✓ |
| Ctenizidae    | <i>Stasimopus mandelai</i>            | ✓ | ✓ | ✓ | ✓ | ✓ |
| Cyatholipidae | <i>Alaranea merina</i>                | ✓ | ✓ | ✓ | ✓ |   |
|               | <i>Cyatholipus sp.</i>                | ✓ | ✓ | ✓ | ✓ |   |
|               | <i>Forstera sp.</i>                   | ✓ | ✓ | ✓ |   | ✓ |
|               | <i>Matilda sp.</i>                    | ✓ | ✓ | ✓ | ✓ |   |
|               | <i>Scharffia chinja</i>               | ✓ |   | ✓ | ✓ |   |
|               | <i>Tekella sp.1</i>                   | ✓ | ✓ | ✓ | ✓ |   |
|               | <i>Tekella sp.2</i>                   |   |   | ✓ | ✓ |   |



|                 |                                 |   |   |   |   |   |   |
|-----------------|---------------------------------|---|---|---|---|---|---|
|                 | <i>Tekelloides sp.1</i>         | ✓ |   |   | ✓ | ✓ |   |
|                 | <i>Tekelloides sp.2</i>         | ✓ |   | ✓ | ✓ | ✓ |   |
| Cybaeidae       | <i>Ulwembua sp.</i>             | ✓ | ✓ | ✓ | ✓ | ✓ | ✓ |
|                 | <i>Calymmaria sp.</i>           | ✓ | ✓ | ✓ | ✓ | ✓ | ✓ |
|                 | <i>Cybaeus giganteus</i>        | ✓ | ✓ | ✓ | ✓ | ✓ | ✓ |
|                 | <i>Cybaeus morosus</i>          | ✓ |   |   | ✓ | ✓ | ✓ |
|                 | <i>Cybaeus mosanensis</i>       | ✓ | ✓ |   |   | ✓ |   |
| Cycloctenidae   | <i>Cycloctenus sp.1</i>         | ✓ | ✓ | ✓ | ✓ | ✓ | ✓ |
|                 | <i>Cycloctenus sp.2</i>         | ✓ | ✓ | ✓ | ✓ | ✓ | ✓ |
|                 | <i>Cycloctenus sp.3</i>         | ✓ | ✓ | ✓ | ✓ | ✓ | ✓ |
|                 | <i>Cycloctenus sp.4</i>         | ✓ | ✓ | ✓ | ✓ | ✓ | ✓ |
|                 | <i>Cycloctenus westlandicus</i> | ✓ | ✓ | ✓ | ✓ | ✓ | ✓ |
|                 | <i>Orepukia sp.</i>             | ✓ | ✓ | ✓ | ✓ | ✓ | ✓ |
|                 | <i>Pakeha sp.</i>               | ✓ | ✓ |   | ✓ | ✓ | ✓ |
|                 | <i>Paravoca sp.</i>             | ✓ | ✓ |   | ✓ | ✓ | ✓ |
|                 | <i>Toxopsiella sp.</i>          | ✓ | ✓ |   | ✓ | ✓ | ✓ |
| Cyrtaucheniidae | <i>Ancylotrypa sp.1</i>         | ✓ | ✓ | ✓ | ✓ | ✓ | ✓ |
|                 | <i>Ancylotrypa sp.2</i>         | ✓ |   |   | ✓ |   |   |
|                 | <i>Fufius atramentarius</i>     |   | ✓ |   | ✓ | ✓ |   |
|                 | <i>Homostola pardalina</i>      | ✓ | ✓ |   | ✓ | ✓ | ✓ |
| Deinopidae      | <i>Avelloopsis capensis</i>     | ✓ | ✓ | ✓ | ✓ |   |   |
|                 | <i>Deinopis sp.1</i>            | ✓ | ✓ | ✓ | ✓ | ✓ |   |
|                 | <i>Deinopis sp.2</i>            | ✓ | ✓ |   | ✓ | ✓ | ✓ |
|                 | <i>Deinopis spinosa</i>         | ✓ | ✓ | ✓ | ✓ | ✓ | ✓ |
|                 | <i>Menneus sp.</i>              | ✓ | ✓ | ✓ | ✓ | ✓ | ✓ |
| Desidae         | <i>Amphinecta sp.1</i>          | ✓ | ✓ | ✓ | ✓ | ✓ | ✓ |
|                 | <i>Amphinecta sp.2</i>          | ✓ | ✓ | ✓ | ✓ | ✓ | ✓ |
|                 | <i>Badumna insignis</i>         | ✓ | ✓ |   | ✓ | ✓ | ✓ |
|                 | <i>Badumna longinqua</i>        | ✓ | ✓ |   | ✓ | ✓ | ✓ |
|                 | <i>Badumna sp.</i>              | ✓ | ✓ | ✓ | ✓ | ✓ | ✓ |
|                 | <i>Baiami sp.</i>               | ✓ | ✓ | ✓ | ✓ | ✓ |   |
|                 | <i>Baranha sp.</i>              | ✓ | ✓ |   | ✓ | ✓ | ✓ |
|                 | <i>Calacadia sp.</i>            | ✓ |   |   | ✓ | ✓ |   |
|                 | <i>Cambridgea sp.</i>           | ✓ | ✓ | ✓ | ✓ | ✓ | ✓ |
|                 | <i>Corasoides sp.</i>           | ✓ | ✓ | ✓ | ✓ | ✓ | ✓ |
|                 | <i>Desis formidabilis</i>       | ✓ | ✓ | ✓ | ✓ | ✓ | ✓ |
|                 | <i>Goyennia sp.</i>             | ✓ | ✓ | ✓ | ✓ | ✓ | ✓ |
|                 | <i>Ischalea sp.</i>             | ✓ | ✓ | ✓ | ✓ | ✓ | ✓ |
|                 | <i>Mamoea sp.</i>               | ✓ | ✓ | ✓ | ✓ | ✓ | ✓ |
|                 | <i>Marplesia sp.1</i>           | ✓ | ✓ | ✓ | ✓ | ✓ | ✓ |
|                 | <i>Marplesia sp.2</i>           | ✓ | ✓ | ✓ | ✓ | ✓ | ✓ |
|                 | <i>Metaltella sp.1</i>          | ✓ |   | ✓ | ✓ | ✓ | ✓ |
|                 | <i>Metaltella sp.2</i>          |   |   | ✓ | ✓ | ✓ | ✓ |
|                 | <i>Metaltella sp.3</i>          | ✓ | ✓ | ✓ | ✓ | ✓ | ✓ |
|                 | <i>Metaltella sp.4</i>          | ✓ |   |   | ✓ | ✓ | ✓ |
|                 | <i>Metaltella sp.5</i>          |   |   | ✓ | ✓ | ✓ | ✓ |
|                 | <i>Nanocambridgea sp.</i>       | ✓ | ✓ | ✓ | ✓ | ✓ | ✓ |
|                 | <i>Neodesis sp.</i>             | ✓ | ✓ | ✓ | ✓ | ✓ | ✓ |

|              |                                  |   |   |   |   |   |   |
|--------------|----------------------------------|---|---|---|---|---|---|
|              | <i>Paramatachia</i> sp.          | ✓ | ✓ | ✓ | ✓ | ✓ | ✓ |
|              | <i>Paramatachia</i> sp.          | ✓ | ✓ | ✓ | ✓ | ✓ |   |
|              | <i>Paramemoea</i> sp.            | ✓ | ✓ | ✓ | ✓ | ✓ | ✓ |
|              | <i>Poaka graminicola</i>         |   |   | ✓ | ✓ | ✓ |   |
|              | <i>Porteria</i> sp.              | ✓ | ✓ |   | ✓ | ✓ |   |
|              | <i>Rangitata</i> sp.             | ✓ | ✓ | ✓ | ✓ | ✓ | ✓ |
| Dictynidae   | <i>Argyroneta aquatica</i>       | ✓ | ✓ |   | ✓ | ✓ | ✓ |
|              | <i>Brigittea latens</i>          | ✓ | ✓ | ✓ |   |   |   |
|              | <i>Dictyna major</i>             |   |   | ✓ | ✓ | ✓ |   |
|              | <i>Dictyna</i> sp.1              | ✓ |   |   | ✓ | ✓ |   |
|              | <i>Dictyna</i> sp.2              | ✓ | ✓ |   | ✓ | ✓ |   |
|              | <i>Lathys alberta</i>            | ✓ |   |   | ✓ | ✓ | ✓ |
|              | <i>Mallos pallidus</i>           | ✓ | ✓ | ✓ | ✓ | ✓ |   |
|              | <i>Mexitlia trivittata</i>       | ✓ | ✓ |   | ✓ | ✓ | ✓ |
|              | <i>Paratheuma shirahamaensis</i> | ✓ | ✓ |   |   | ✓ |   |
|              | <i>Saltonia incerta</i>          | ✓ | ✓ |   | ✓ | ✓ | ✓ |
| Diguetidae   | <i>Diguetia canities</i>         | ✓ |   |   | ✓ | ✓ |   |
|              | <i>Diguetia catamarquensis</i>   |   |   |   | ✓ | ✓ |   |
|              | <i>Diguetia</i> sp.              | ✓ | ✓ | ✓ | ✓ | ✓ |   |
|              | <i>Segestrioides tofo</i>        |   | ✓ | ✓ | ✓ | ✓ | ✓ |
| Dipluridae   | <i>Allothele australis</i>       | ✓ | ✓ | ✓ | ✓ |   | ✓ |
|              | <i>Australothele jamiesoni</i>   |   |   |   | ✓ | ✓ |   |
|              | <i>Cethegus fugax</i>            |   | ✓ |   | ✓ | ✓ | ✓ |
| Drymusidae   | <i>Drymusa rengen</i>            | ✓ | ✓ | ✓ | ✓ | ✓ | ✓ |
|              | <i>Drymusa</i> sp.1              | ✓ | ✓ | ✓ |   | ✓ | ✓ |
|              | <i>Drymusa</i> sp.2              | ✓ | ✓ |   | ✓ |   | ✓ |
| Dysderidae   | <i>Cryptoparachtes</i> sp.       |   | ✓ | ✓ | ✓ | ✓ | ✓ |
|              | <i>Dasumia taeniifera</i>        | ✓ | ✓ | ✓ | ✓ | ✓ | ✓ |
|              | <i>Dysdera erythrina</i>         | ✓ | ✓ | ✓ | ✓ | ✓ | ✓ |
|              | <i>Dysdera</i> sp.               | ✓ |   | ✓ | ✓ | ✓ | ✓ |
|              | <i>Dysderocrates egregius</i>    |   | ✓ | ✓ | ✓ | ✓ | ✓ |
|              | <i>Harpactea hombergi</i>        | ✓ | ✓ | ✓ | ✓ | ✓ | ✓ |
|              | <i>Harpactocrates globifer</i>   | ✓ | ✓ |   | ✓ | ✓ | ✓ |
|              | <i>Holissus unciger</i>          |   | ✓ | ✓ | ✓ | ✓ | ✓ |
|              | <i>Hygrocrates lycaoniae</i>     |   | ✓ | ✓ | ✓ | ✓ | ✓ |
|              | <i>Parachtes verna</i>           |   | ✓ | ✓ | ✓ | ✓ | ✓ |
|              | <i>Rhode scutiventris</i>        | ✓ | ✓ | ✓ | ✓ | ✓ | ✓ |
| Eresidae     | <i>Adonea fimbriata</i>          | ✓ |   |   | ✓ | ✓ |   |
|              | <i>Dorceus fastuosus</i>         | ✓ |   |   | ✓ | ✓ | ✓ |
|              | <i>Dresserus kannemeyeri</i>     | ✓ |   |   | ✓ | ✓ | ✓ |
|              | <i>Eresus walckenaeri</i>        | ✓ | ✓ |   | ✓ | ✓ | ✓ |
|              | <i>Gandanameno spenceri</i>      | ✓ | ✓ |   | ✓ | ✓ | ✓ |
|              | <i>Paradonea variegata</i>       | ✓ |   |   | ✓ |   |   |
|              | <i>Seothyra annettae</i>         | ✓ |   |   | ✓ | ✓ | ✓ |
|              | <i>Stegodyphus mimosarum</i>     | ✓ | ✓ |   | ✓ | ✓ | ✓ |
|              | <i>Stegodyphus</i> sp.           | ✓ | ✓ | ✓ | ✓ | ✓ | ✓ |
| Euctenizidae | <i>Apomastus kristenae</i>       | ✓ | ✓ |   | ✓ |   |   |
|              | <i>Aptostichus</i> sp.           |   | ✓ |   | ✓ |   | ✓ |

|                 |                                        |   |   |   |   |   |   |
|-----------------|----------------------------------------|---|---|---|---|---|---|
|                 | <i>Entychides arizonicus</i>           |   | ✓ |   | ✓ | ✓ | ✓ |
|                 | <i>Entychides</i> sp.                  |   | ✓ |   | ✓ |   | ✓ |
|                 | <i>Eucteniza cabowabo</i>              | ✓ | ✓ | ✓ | ✓ | ✓ | ✓ |
|                 | <i>Eucteniza relata</i>                |   | ✓ |   | ✓ | ✓ |   |
|                 | <i>Myrmekiaphila fluviatilis</i>       | ✓ | ✓ | ✓ | ✓ |   | ✓ |
|                 | <i>Neoapachella rothi</i>              | ✓ | ✓ |   | ✓ |   |   |
|                 | <i>Promyrmekiaphila</i> sp.            | ✓ | ✓ |   | ✓ |   |   |
| Filistatidae    | <i>Filistata</i> sp.                   | ✓ | ✓ | ✓ | ✓ | ✓ | ✓ |
|                 | <i>Kukulcania</i> sp.                  | ✓ | ✓ | ✓ | ✓ | ✓ | ✓ |
|                 | <i>Misionella mendensis</i>            | ✓ | ✓ | ✓ | ✓ | ✓ | ✓ |
|                 | <i>Pikelinia tambilloi</i>             | ✓ | ✓ | ✓ | ✓ | ✓ | ✓ |
|                 | <i>Pritha nana</i>                     | ✓ | ✓ | ✓ | ✓ | ✓ |   |
|                 | <i>Unidentified Filistatidae</i>       |   |   | ✓ | ✓ | ✓ | ✓ |
|                 | <i>Wandella</i> sp.                    |   | ✓ | ✓ | ✓ | ✓ |   |
|                 | <i>Zaitunia</i> sp.                    |   | ✓ | ✓ | ✓ | ✓ | ✓ |
| Gallieniellidae | <i>Gallieniella betroka</i>            | ✓ | ✓ | ✓ | ✓ | ✓ |   |
|                 | <i>Gallieniella</i> sp.                |   | ✓ | ✓ | ✓ | ✓ | ✓ |
|                 | <i>Legendrena</i> sp.                  | ✓ | ✓ | ✓ | ✓ | ✓ | ✓ |
|                 | <i>Meedo broadwater</i>                | ✓ | ✓ | ✓ | ✓ | ✓ | ✓ |
|                 | <i>Neato beerwah</i>                   | ✓ | ✓ | ✓ | ✓ | ✓ | ✓ |
| Gnaphosidae     | <i>Asemesthes</i> cf. <i>corticola</i> | ✓ |   |   | ✓ | ✓ | ✓ |
|                 | <i>Camillina calel</i>                 | ✓ |   | ✓ | ✓ | ✓ | ✓ |
|                 | <i>Drassodes lapidosus</i>             | ✓ | ✓ | ✓ | ✓ |   |   |
|                 | <i>Eilica</i> cf. <i>trilineata</i>    | ✓ | ✓ | ✓ | ✓ | ✓ |   |
|                 | <i>Epicharitus</i> sp.                 | ✓ | ✓ | ✓ | ✓ | ✓ | ✓ |
|                 | <i>Gnaphosa lucifuga</i>               | ✓ | ✓ | ✓ | ✓ | ✓ | ✓ |
|                 | <i>Hemicloea semiplumosa</i>           | ✓ | ✓ | ✓ | ✓ | ✓ | ✓ |
|                 | <i>Hemicloea</i> sp. 1                 | ✓ | ✓ |   | ✓ | ✓ | ✓ |
|                 | <i>Hemicloea</i> sp. 2                 | ✓ | ✓ |   | ✓ | ✓ | ✓ |
|                 | <i>Intruda signata</i>                 | ✓ | ✓ | ✓ | ✓ | ✓ |   |
|                 | <i>Micaria</i> sp.                     | ✓ | ✓ | ✓ | ✓ | ✓ | ✓ |
|                 | <i>Molycria broadwater</i>             |   | ✓ |   | ✓ | ✓ | ✓ |
|                 | <i>Molycria</i> sp.                    | ✓ | ✓ | ✓ | ✓ | ✓ | ✓ |
|                 | <i>Myandra bicincta</i>                |   |   | ✓ | ✓ | ✓ |   |
|                 | <i>Unidentified Gnaphosidae</i>        | ✓ | ✓ |   | ✓ | ✓ | ✓ |
|                 | <i>Vectius niger</i>                   |   | ✓ | ✓ | ✓ | ✓ | ✓ |
|                 | <i>Zelotes</i> sp.                     | ✓ | ✓ | ✓ | ✓ | ✓ | ✓ |
| Gradungulidae   | <i>Gradungula sorenseni</i>            | ✓ | ✓ | ✓ | ✓ | ✓ |   |
|                 | <i>Gradungula</i> sp.                  | ✓ | ✓ | ✓ | ✓ | ✓ |   |
|                 | <i>Macrogradungula moonya</i>          | ✓ | ✓ | ✓ | ✓ | ✓ | ✓ |
|                 | <i>Tarlina</i> sp.                     | ✓ | ✓ | ✓ | ✓ | ✓ | ✓ |
| Hahniidae       | <i>Cicurina vobora</i>                 | ✓ | ✓ | ✓ | ✓ | ✓ |   |
|                 | <i>Cybaeolus</i> cf. <i>rastellus</i>  | ✓ | ✓ |   | ✓ | ✓ | ✓ |
|                 | <i>Cybaeolus pusillus</i>              |   |   |   | ✓ | ✓ | ✓ |
|                 | <i>Hahnia nava</i>                     |   | ✓ | ✓ |   | ✓ | ✓ |
|                 | <i>Neoantistea agilis</i>              | ✓ |   |   | ✓ | ✓ | ✓ |
| Halonoproctidae | <i>Bothriocyrtum californicum</i>      |   | ✓ | ✓ | ✓ | ✓ | ✓ |
|                 | <i>Conothele</i> sp.                   | ✓ | ✓ |   | ✓ | ✓ | ✓ |

|                |                                        |   |   |   |   |   |   |
|----------------|----------------------------------------|---|---|---|---|---|---|
|                | <i>Cyclocosmia loricata</i>            | ✓ | ✓ |   | ✓ |   |   |
|                | <i>Cyclocosmia</i> sp.                 | ✓ | ✓ | ✓ | ✓ | ✓ |   |
|                | <i>Hebestatis</i> sp.                  | ✓ |   |   | ✓ | ✓ |   |
|                | <i>Ummidia</i> sp.1                    |   | ✓ |   | ✓ |   | ✓ |
|                | <i>Ummidia</i> sp.2                    | ✓ | ✓ | ✓ | ✓ |   | ✓ |
| Hersiliidae    | <i>Hersilia sericea</i>                | ✓ | ✓ | ✓ | ✓ | ✓ | ✓ |
|                | <i>Hersiliola macullulata</i>          | ✓ |   |   | ✓ | ✓ | ✓ |
|                | <i>Iviraiva argentina</i>              |   | ✓ |   | ✓ | ✓ | ✓ |
|                | <i>Ypypuera crucifera</i>              | ✓ | ✓ |   | ✓ | ✓ |   |
| Hexathelidae   | <i>Bymainiella terraereginae</i>       | ✓ | ✓ | ✓ | ✓ | ✓ | ✓ |
|                | <i>Mediothele</i> cf. <i>australis</i> | ✓ | ✓ |   | ✓ | ✓ | ✓ |
|                | <i>Paraembolides cannoni</i>           | ✓ | ✓ |   | ✓ | ✓ |   |
|                | <i>Scotinoecus cinereopilosus</i>      | ✓ | ✓ | ✓ | ✓ | ✓ |   |
| Homalonychidae | <i>Homalonychus selenopoides</i>       | ✓ | ✓ |   | ✓ | ✓ | ✓ |
|                | <i>Homalonychus</i> sp.                | ✓ | ✓ | ✓ | ✓ | ✓ | ✓ |
| Huttoniidae    | <i>Huttonia</i> sp. 1                  | ✓ |   |   | ✓ | ✓ | ✓ |
|                | <i>Huttonia</i> sp.2                   |   | ✓ |   | ✓ | ✓ | ✓ |
| Hypochilidae   | <i>Hypochilus pococki</i>              | ✓ | ✓ | ✓ | ✓ | ✓ |   |
| Idiopidae      | <i>Cataxia bolganupensis</i>           |   | ✓ |   | ✓ | ✓ |   |
|                | <i>Homogona pulleinei</i>              |   |   |   | ✓ | ✓ |   |
|                | <i>Idiops</i> sp.                      | ✓ | ✓ | ✓ | ✓ | ✓ | ✓ |
|                | <i>Misgolas hubbardi</i>               | ✓ | ✓ | ✓ | ✓ | ✓ | ✓ |
|                | <i>Segregara abrahami</i>              | ✓ | ✓ | ✓ | ✓ | ✓ | ✓ |
| Lamponidae     | <i>Asadipus kunderang</i>              | ✓ | ✓ | ✓ |   | ✓ | ✓ |
|                | <i>Centrothele mutica</i>              | ✓ | ✓ | ✓ | ✓ | ✓ | ✓ |
|                | <i>Lampona</i> sp.                     | ✓ | ✓ | ✓ | ✓ | ✓ | ✓ |
| Leptonetidae   | <i>Archoleptoneta schusteri</i>        | ✓ |   |   | ✓ |   | ✓ |
|                | <i>Archoleptoneta</i> sp. 1            | ✓ |   |   | ✓ |   | ✓ |
|                | <i>Archoleptoneta</i> sp.2             | ✓ | ✓ |   | ✓ | ✓ |   |
|                | <i>Calileptoneta</i> sp.               | ✓ |   |   | ✓ |   | ✓ |
|                | <i>Leptoneta infuscata</i>             | ✓ | ✓ | ✓ | ✓ | ✓ |   |
|                | <i>Neoleptoneta rainesi</i>            | ✓ |   |   | ✓ |   | ✓ |
| Linyphiidae    | <i>Agyneta ramosa</i>                  |   | ✓ |   | ✓ | ✓ | ✓ |
|                | <i>Australolinyphia</i> sp.            | ✓ | ✓ |   | ✓ | ✓ | ✓ |
|                | <i>Bathyphantes gracilis</i>           | ✓ | ✓ |   | ✓ | ✓ | ✓ |
|                | <i>Diplostyla concolor</i>             | ✓ | ✓ |   | ✓ | ✓ | ✓ |
|                | <i>Dubiaranea aysenensis</i>           |   | ✓ |   | ✓ | ✓ | ✓ |
|                | <i>Frontinella</i> sp. 1               |   | ✓ |   | ✓ | ✓ |   |
|                | <i>Frontinella</i> sp.2                | ✓ | ✓ | ✓ | ✓ | ✓ | ✓ |
|                | <i>Gonatium rubellum</i>               |   | ✓ |   | ✓ | ✓ | ✓ |
|                | <i>Gongylidiellum vivum</i>            |   | ✓ |   | ✓ |   | ✓ |
|                | <i>Haplinis diloris</i>                | ✓ | ✓ | ✓ | ✓ | ✓ | ✓ |
|                | <i>Haplinis</i> sp.                    | ✓ | ✓ | ✓ | ✓ | ✓ |   |
|                | <i>Hylyphantes graminicola</i>         | ✓ | ✓ | ✓ | ✓ | ✓ |   |
|                | <i>Labulinyphia tersa</i>              | ✓ | ✓ | ✓ | ✓ | ✓ | ✓ |
|                | <i>Laperousea</i> sp.                  | ✓ | ✓ |   | ✓ | ✓ | ✓ |
|                | <i>Lepthyphantes minutus</i>           | ✓ | ✓ |   | ✓ | ✓ | ✓ |
|                | <i>Linyphia</i> sp.                    | ✓ | ✓ | ✓ | ✓ | ✓ | ✓ |

|              |                                           |   |   |   |   |   |   |
|--------------|-------------------------------------------|---|---|---|---|---|---|
|              | <i>Linyphia triangularis</i>              | ✓ | ✓ | ✓ | ✓ | ✓ | ✓ |
|              | <i>Microlinyphia dana</i>                 | ✓ | ✓ |   | ✓ | ✓ |   |
|              | <i>Microlinyphia</i> sp.                  |   |   | ✓ | ✓ | ✓ |   |
|              | <i>Microneta viaria</i>                   | ✓ | ✓ |   | ✓ | ✓ | ✓ |
|              | <i>Neomaso patagonicus</i>                | ✓ | ✓ |   | ✓ | ✓ |   |
|              | <i>Neriere radiata</i>                    | ✓ | ✓ | ✓ | ✓ | ✓ | ✓ |
|              | <i>Novafroneta</i> sp.                    | ✓ | ✓ | ✓ | ✓ | ✓ | ✓ |
|              | <i>Oedothorax apicatus</i>                | ✓ | ✓ |   | ✓ | ✓ | ✓ |
|              | <i>Orsonwelles polites</i>                | ✓ | ✓ |   | ✓ | ✓ | ✓ |
|              | <i>Ostearius melanopygius</i>             |   | ✓ |   | ✓ | ✓ | ✓ |
|              | <i>Parafroneta</i> sp.                    | ✓ | ✓ |   | ✓ | ✓ | ✓ |
|              | <i>Porrhomma montanum</i>                 | ✓ | ✓ |   | ✓ | ✓ |   |
|              | <i>Solenysa</i> sp.                       | ✓ | ✓ |   | ✓ | ✓ |   |
|              | <i>Spirembolus erratus</i>                |   | ✓ | ✓ | ✓ | ✓ |   |
|              | <i>Stemonyphantes</i> sp.                 | ✓ | ✓ |   | ✓ | ✓ | ✓ |
|              | <i>Tenuiphantes tenuis</i>                | ✓ | ✓ |   | ✓ | ✓ | ✓ |
|              | <i>Walckenaeria keikoe</i>                | ✓ | ✓ |   | ✓ | ✓ |   |
| Liocranidae  | <i>Apostenus californicus</i>             | ✓ | ✓ |   | ✓ | ✓ | ✓ |
|              | <i>Apostenus</i> sp.                      |   | ✓ | ✓ | ✓ | ✓ | ✓ |
|              | <i>Donuea</i> sp.1                        | ✓ | ✓ | ✓ | ✓ | ✓ |   |
|              | <i>Donuea</i> sp.2                        | ✓ | ✓ | ✓ | ✓ | ✓ |   |
|              | <i>Sesieutes</i> cf. <i>schwendingeri</i> | ✓ | ✓ | ✓ | ✓ | ✓ |   |
|              | <i>Teutamus</i> sp.                       | ✓ | ✓ |   | ✓ | ✓ |   |
|              | Unidentified Liocranidae                  | ✓ | ✓ | ✓ | ✓ | ✓ |   |
|              | <i>Heptathela kimurai</i>                 |   | ✓ | ✓ | ✓ | ✓ |   |
| Liphistiidae | <i>Liphistius bicoloripes</i>             |   | ✓ | ✓ | ✓ | ✓ |   |
|              | <i>Liphistius</i> cf. <i>murphyorum</i>   |   |   |   | ✓ | ✓ |   |
|              | <i>Liphistius</i> sp.                     | ✓ | ✓ | ✓ |   |   |   |
| Lycosidae    | <i>Ryuthela nishihirai</i>                | ✓ |   |   | ✓ |   |   |
|              | <i>Allocosa</i> sp.                       | ✓ | ✓ | ✓ | ✓ | ✓ | ✓ |
|              | <i>Alopecosa licenti</i>                  | ✓ | ✓ | ✓ | ✓ | ✓ |   |
|              | <i>Arctosa kwangreungensis</i>            | ✓ | ✓ | ✓ | ✓ | ✓ |   |
|              | <i>Hippasa</i> sp.1                       |   |   |   | ✓ | ✓ |   |
|              | <i>Hippasa</i> sp.2                       |   | ✓ | ✓ |   | ✓ | ✓ |
|              | <i>Hogna</i> cf. <i>frondicola</i>        | ✓ |   |   | ✓ | ✓ | ✓ |
|              | <i>Pardosa astrigera</i>                  | ✓ | ✓ | ✓ | ✓ | ✓ |   |
|              | <i>Pardosa saxatilis</i>                  |   |   |   | ✓ | ✓ | ✓ |
|              | <i>Pardosa</i> sp.1                       | ✓ |   | ✓ | ✓ | ✓ | ✓ |
|              | <i>Pardosa</i> sp.2                       |   |   | ✓ | ✓ | ✓ | ✓ |
|              | <i>Pirata minutus</i>                     | ✓ |   |   | ✓ | ✓ |   |
|              | <i>Pirata subpiraticus</i>                | ✓ | ✓ | ✓ | ✓ | ✓ |   |
|              | <i>Rabidosa rabida</i>                    | ✓ | ✓ | ✓ | ✓ | ✓ | ✓ |
|              | <i>Schizocosa</i> sp.                     | ✓ | ✓ | ✓ | ✓ |   |   |
|              | <i>Trochosa ruricola</i>                  | ✓ | ✓ | ✓ | ✓ |   |   |
|              | <i>Varacosa gosiuta</i>                   |   |   |   | ✓ | ✓ | ✓ |
|              | <i>Venonia</i> cf. <i>coruscans</i>       |   | ✓ |   | ✓ |   |   |
| Malkaridae   | <i>Carathea parawea</i>                   |   | ✓ |   |   | ✓ | ✓ |
|              | <i>Chilenodes australis</i>               |   | ✓ |   | ✓ | ✓ | ✓ |

|                   |                                    |   |   |   |   |   |   |
|-------------------|------------------------------------|---|---|---|---|---|---|
|                   | <i>Malkara sp.1</i>                |   | ✓ |   | ✓ | ✓ | ✓ |
|                   | <i>Malkara sp.2</i>                |   |   |   | ✓ | ✓ | ✓ |
|                   | <i>Pararchaea sp.1</i>             | ✓ |   |   |   | ✓ | ✓ |
|                   | <i>Pararchaea sp.2</i>             |   | ✓ |   | ✓ | ✓ | ✓ |
| Mecysmaucheniidae | <i>Aotearoa magna</i>              | ✓ |   |   | ✓ | ✓ | ✓ |
|                   | <i>Chilarchaea quellon</i>         | ✓ | ✓ |   | ✓ | ✓ | ✓ |
|                   | <i>Mecysmauchenius segmentatus</i> | ✓ |   |   | ✓ | ✓ | ✓ |
|                   | <i>Mecysmauchenius sp.</i>         | ✓ | ✓ | ✓ | ✓ | ✓ | ✓ |
|                   | <i>Mesarchaea bellavista</i>       | ✓ |   |   | ✓ | ✓ |   |
|                   | <i>Zearchaea sp.</i>               | ✓ |   |   | ✓ | ✓ | ✓ |
| Megadictynidae    | <i>Megadictyna sp.</i>             | ✓ | ✓ | ✓ |   | ✓ | ✓ |
| Microstigmatidae  | <i>Microstigmata longipes</i>      |   | ✓ |   | ✓ | ✓ |   |
| Migidae           | <i>Heteromigas terraereginae</i>   | ✓ | ✓ |   | ✓ | ✓ |   |
|                   | <i>Migas sp.1</i>                  | ✓ | ✓ | ✓ | ✓ | ✓ | ✓ |
|                   | <i>Migas sp.2</i>                  | ✓ | ✓ | ✓ | ✓ | ✓ | ✓ |
|                   | <i>Migas variapalpus</i>           |   |   |   | ✓ | ✓ | ✓ |
|                   | <i>Moggridgea crudeni</i>          |   | ✓ |   | ✓ |   |   |
|                   | <i>Moggridgea tingle</i>           | ✓ |   |   | ✓ |   | ✓ |
|                   | <i>Poecilomigas abrahami</i>       | ✓ | ✓ | ✓ | ✓ |   | ✓ |
| Mimetidae         | <i>Australomimetes sp.</i>         | ✓ | ✓ |   | ✓ | ✓ | ✓ |
|                   | <i>Ero sp.</i>                     |   | ✓ |   | ✓ |   | ✓ |
|                   | <i>Gelanor latus</i>               | ✓ | ✓ | ✓ | ✓ | ✓ | ✓ |
|                   | <i>Mimetes banksi</i>              | ✓ |   |   | ✓ | ✓ | ✓ |
|                   | <i>Mimetes sp.</i>                 |   | ✓ |   | ✓ | ✓ |   |
|                   | <i>Unidentified Mimetidae</i>      |   | ✓ |   | ✓ | ✓ |   |
| Miturgidae        | <i>Argoctenus sp.</i>              | ✓ | ✓ | ✓ | ✓ | ✓ | ✓ |
|                   | <i>Cyclocrassus sp.</i>            |   | ✓ |   | ✓ | ✓ | ✓ |
|                   | <i>Mituliodon tarantulinus</i>     |   | ✓ | ✓ | ✓ |   | ✓ |
|                   | <i>Miturga lineata</i>             | ✓ | ✓ | ✓ | ✓ | ✓ | ✓ |
|                   | <i>Nuliodon fishburni</i>          | ✓ | ✓ | ✓ | ✓ | ✓ | ✓ |
|                   | <i>Odo bruchi</i>                  | ✓ | ✓ |   | ✓ | ✓ | ✓ |
|                   | <i>Parapostenus sp.</i>            |   | ✓ |   | ✓ | ✓ | ✓ |
|                   | <i>Paravulsor sp.</i>              | ✓ |   |   | ✓ | ✓ | ✓ |
|                   | <i>Syspira sp.</i>                 | ✓ | ✓ | ✓ | ✓ | ✓ | ✓ |
|                   | <i>Teminius sp.</i>                | ✓ | ✓ | ✓ | ✓ | ✓ | ✓ |
|                   | <i>Xenoctenus sp.</i>              | ✓ |   | ✓ | ✓ | ✓ | ✓ |
|                   | <i>Zora spinimana</i>              | ✓ | ✓ | ✓ | ✓ | ✓ | ✓ |
| Mysmenidae        | <i>Maymena ambita</i>              | ✓ | ✓ | ✓ | ✓ | ✓ | ✓ |
|                   | <i>Maymena sp.</i>                 | ✓ | ✓ |   | ✓ | ✓ | ✓ |
|                   | <i>Microdipoena sp.1</i>           | ✓ | ✓ |   | ✓ | ✓ | ✓ |
|                   | <i>Microdipoena sp.2</i>           | ✓ | ✓ | ✓ | ✓ | ✓ | ✓ |
|                   | <i>Mysmena leichardti</i>          | ✓ |   |   | ✓ | ✓ |   |
|                   | <i>Mysmena sp.</i>                 | ✓ |   | ✓ | ✓ | ✓ | ✓ |
|                   | <i>Mysmena tasmaniae</i>           | ✓ |   |   | ✓ | ✓ | ✓ |
|                   | <i>Trogloneta granulum</i>         |   | ✓ |   | ✓ | ✓ |   |
|                   | <i>Trogloneta sp.</i>              | ✓ | ✓ |   | ✓ | ✓ | ✓ |
|                   | <i>Unidentified Mysmenidae</i>     | ✓ |   |   | ✓ | ✓ | ✓ |
| Nemesiidae        | <i>Acanthogonatus campanae</i>     | ✓ | ✓ |   | ✓ | ✓ |   |

|                 |                                    |   |   |   |   |   |   |
|-----------------|------------------------------------|---|---|---|---|---|---|
|                 | <i>Aname sp.</i>                   | ✓ | ✓ | ✓ | ✓ | ✓ | ✓ |
|                 | <i>Brachythele sp.</i>             | ✓ | ✓ |   | ✓ |   | ✓ |
|                 | <i>Chenistonia tepperi</i>         | ✓ | ✓ | ✓ | ✓ | ✓ | ✓ |
|                 | <i>Ixamatus sp.</i>                | ✓ | ✓ |   | ✓ | ✓ | ✓ |
|                 | <i>Kiama lachrymoides</i>          |   | ✓ |   | ✓ | ✓ | ✓ |
|                 | <i>Nemesiidae (new genus) 1</i>    | ✓ | ✓ | ✓ | ✓ |   | ✓ |
|                 | <i>Nemesiidae (new genus) 2</i>    | ✓ | ✓ |   | ✓ |   |   |
|                 | <i>Stanwellia hoggi</i>            | ✓ | ✓ | ✓ | ✓ | ✓ |   |
|                 | <i>Stenoteromatta palmer</i>       | ✓ | ✓ | ✓ | ✓ |   |   |
| Nesticidae      | <i>Carpathonesticus hungaricus</i> | ✓ | ✓ |   |   |   | ✓ |
|                 | <i>Eidmanella pallida</i>          | ✓ | ✓ |   | ✓ | ✓ | ✓ |
|                 | <i>Gaucelmus augustinus</i>        | ✓ | ✓ | ✓ | ✓ | ✓ | ✓ |
|                 | <i>Nesticella brevipes</i>         | ✓ | ✓ |   | ✓ | ✓ | ✓ |
|                 | <i>Nesticus cooperi</i>            | ✓ | ✓ |   | ✓ | ✓ |   |
| Nicodamidae     | <i>Ambicodamus marae</i>           | ✓ | ✓ | ✓ | ✓ | ✓ | ✓ |
|                 | <i>Megadictyna thilenii</i>        | ✓ | ✓ |   | ✓ | ✓ | ✓ |
|                 | <i>Oncodamus decipiens</i>         | ✓ |   |   | ✓ | ✓ | ✓ |
|                 | <i>Unidentified Nicodamidae</i>    | ✓ | ✓ | ✓ | ✓ | ✓ |   |
| Ochyroceratidae | <i>Ochyrocera sp.1</i>             |   | ✓ |   | ✓ |   |   |
|                 | <i>Ochyrocera sp.2</i>             | ✓ | ✓ | ✓ | ✓ | ✓ |   |
|                 | <i>Theotima sp.</i>                |   | ✓ | ✓ | ✓ | ✓ |   |
| Oecobiidae      | <i>Oecobius cellariorum</i>        |   | ✓ | ✓ |   | ✓ |   |
|                 | <i>Oecobius sp.</i>                | ✓ | ✓ |   | ✓ | ✓ |   |
|                 | <i>Uroctea durandi</i>             | ✓ | ✓ |   | ✓ | ✓ | ✓ |
|                 | <i>Uroctea sp.</i>                 | ✓ | ✓ | ✓ | ✓ | ✓ | ✓ |
| Oonopidae       | <i>Ischnothyreus sp.</i>           |   | ✓ | ✓ | ✓ | ✓ | ✓ |
|                 | <i>Oonops procerus</i>             | ✓ | ✓ |   | ✓ | ✓ |   |
|                 | <i>Opopaea sp.1</i>                |   | ✓ | ✓ | ✓ | ✓ |   |
|                 | <i>Opopaea sp.2</i>                |   |   |   | ✓ | ✓ |   |
|                 | <i>Orchestina sp.1</i>             |   |   |   |   | ✓ |   |
|                 | <i>Orchestina sp.2</i>             |   |   |   | ✓ | ✓ |   |
|                 | <i>Scaphiella sp.</i>              |   | ✓ | ✓ | ✓ | ✓ |   |
|                 | <i>Stenoops sp.</i>                |   | ✓ | ✓ | ✓ | ✓ |   |
|                 | <i>Triaeris sp.</i>                | ✓ | ✓ |   | ✓ | ✓ | ✓ |
| Orsolobidae     | <i>Afrilobus sp.</i>               | ✓ |   |   | ✓ | ✓ | ✓ |
|                 | <i>Mallecolobus sp.</i>            | ✓ | ✓ | ✓ | ✓ | ✓ |   |
|                 | <i>Orsolobus montt</i>             | ✓ | ✓ | ✓ | ✓ | ✓ | ✓ |
|                 | <i>Subantarctia sp.</i>            | ✓ | ✓ |   | ✓ | ✓ |   |
|                 | <i>Tasmanoonops sp.</i>            | ✓ | ✓ |   | ✓ | ✓ |   |
|                 | <i>Unidentified Orsolobidae1</i>   |   | ✓ | ✓ |   | ✓ | ✓ |
|                 | <i>Unidentified Orsolobidae2</i>   | ✓ | ✓ |   | ✓ | ✓ |   |
| Oxyopidae       | <i>Hamataliwa sp.</i>              | ✓ | ✓ | ✓ | ✓ | ✓ | ✓ |
|                 | <i>Oxyopes salticus</i>            | ✓ | ✓ |   | ✓ | ✓ |   |
|                 | <i>Peucetia sp.</i>                | ✓ | ✓ |   | ✓ | ✓ | ✓ |
|                 | <i>Tapinillus sp.</i>              | ✓ | ✓ |   | ✓ | ✓ | ✓ |
|                 | <i>Unidentified Oxyopidae</i>      | ✓ | ✓ | ✓ | ✓ | ✓ | ✓ |
| Pacullidae      | <i>Lamania sp.1</i>                |   | ✓ |   | ✓ | ✓ | ✓ |
|                 | <i>Lamania sp.2</i>                | ✓ | ✓ | ✓ | ✓ | ✓ | ✓ |

|                |                                      |   |   |   |   |   |   |
|----------------|--------------------------------------|---|---|---|---|---|---|
|                | <i>Paculla</i> sp.                   | ✓ | ✓ |   | ✓ | ✓ |   |
|                | <i>Perania nasuta</i>                | ✓ |   | ✓ | ✓ | ✓ |   |
| Palpimanidae   | <i>Ikuma</i> sp.                     | ✓ |   |   | ✓ | ✓ | ✓ |
|                | <i>Notiothops</i> sp.                | ✓ | ✓ |   | ✓ | ✓ | ✓ |
|                | <i>Otiothops</i> sp.                 | ✓ | ✓ | ✓ | ✓ | ✓ | ✓ |
|                | <i>Palpimanus gibbulus</i>           | ✓ |   |   |   | ✓ |   |
|                | <i>Palpimanus</i> sp. 1              | ✓ | ✓ |   | ✓ | ✓ | ✓ |
|                | <i>Palpimanus</i> sp. 2              | ✓ |   |   | ✓ | ✓ | ✓ |
|                | <i>Palpimanus transvaalicus</i>      |   |   |   | ✓ | ✓ |   |
|                | <i>Sarascelis</i> cf. <i>chaperi</i> | ✓ | ✓ |   | ✓ | ✓ | ✓ |
|                | <i>Scelidocteus</i> sp.              |   | ✓ |   | ✓ | ✓ | ✓ |
| Paratropidae   | <i>Paratropis</i> sp.                | ✓ | ✓ |   | ✓ | ✓ |   |
| Penestomidae   | <i>Penestomus egazini</i>            | ✓ | ✓ | ✓ | ✓ | ✓ | ✓ |
| Periegopidae   | <i>Periegops</i> sp.                 | ✓ |   |   | ✓ |   |   |
|                | <i>Periegops suteri</i>              | ✓ |   | ✓ | ✓ | ✓ | ✓ |
| Philodromidae  | <i>Pagiopalus nigriventris</i>       | ✓ | ✓ |   |   |   | ✓ |
|                | <i>Pedinopistha stigmatica</i>       | ✓ | ✓ |   |   |   | ✓ |
|                | <i>Petrichus</i> sp.                 |   | ✓ |   | ✓ | ✓ | ✓ |
|                | <i>Philodromus aureolus</i>          | ✓ | ✓ |   | ✓ | ✓ |   |
|                | <i>Thanatus formicinus</i>           | ✓ |   | ✓ | ✓ | ✓ | ✓ |
|                | <i>Thanatus</i> sp.                  | ✓ | ✓ |   |   | ✓ | ✓ |
|                | <i>Tibellus chamberlini</i>          | ✓ | ✓ |   | ✓ | ✓ | ✓ |
|                | <i>Tibellus oblongus</i>             | ✓ | ✓ |   | ✓ | ✓ | ✓ |
|                | <i>Titanebo mexicanus</i>            | ✓ | ✓ | ✓ | ✓ | ✓ | ✓ |
| Pholcidae      | <i>Artema atlanta</i>                | ✓ | ✓ | ✓ |   |   | ✓ |
|                | <i>Carapoia genitalis</i>            | ✓ | ✓ | ✓ | ✓ | ✓ | ✓ |
|                | <i>Crossopriza lyoni</i>             | ✓ | ✓ | ✓ | ✓ | ✓ | ✓ |
|                | <i>Holocnemus pluchei</i>            | ✓ |   | ✓ | ✓ | ✓ | ✓ |
|                | <i>Ibotyporanga naideae</i>          | ✓ | ✓ |   | ✓ |   |   |
|                | <i>Leptopholcus gracilis</i>         | ✓ | ✓ | ✓ | ✓ | ✓ | ✓ |
|                | <i>Mesabolivar</i> sp.               | ✓ | ✓ | ✓ | ✓ | ✓ | ✓ |
|                | <i>Metagonia furcata</i>             | ✓ | ✓ | ✓ | ✓ | ✓ | ✓ |
|                | <i>Micropholcus fauroti</i>          | ✓ | ✓ | ✓ | ✓ | ✓ | ✓ |
|                | <i>Modisimus</i> sp.                 |   | ✓ |   | ✓ | ✓ | ✓ |
|                | <i>Nita elsaff</i>                   | ✓ | ✓ | ✓ |   | ✓ | ✓ |
|                | <i>Nyikoa limbe</i>                  | ✓ | ✓ | ✓ | ✓ | ✓ | ✓ |
|                | <i>Pehrforsskalia conopyga</i>       | ✓ | ✓ | ✓ | ✓ | ✓ | ✓ |
|                | <i>Pholcophora americana</i>         | ✓ | ✓ |   | ✓ |   |   |
|                | <i>Pholcus atrigularis</i>           | ✓ | ✓ | ✓ |   | ✓ |   |
|                | <i>Pholcus kakum</i>                 |   | ✓ | ✓ | ✓ | ✓ | ✓ |
|                | <i>Pholcus opilionoides</i>          |   | ✓ | ✓ | ✓ |   |   |
|                | <i>Pholcus phalangioides</i>         | ✓ | ✓ | ✓ | ✓ | ✓ |   |
|                | <i>Psilochorus itaguyrussu</i>       | ✓ | ✓ | ✓ | ✓ | ✓ | ✓ |
|                | <i>Quamtana</i> sp.                  | ✓ | ✓ | ✓ | ✓ | ✓ | ✓ |
|                | <i>Smeringopus pallidus</i>          | ✓ | ✓ | ✓ | ✓ | ✓ | ✓ |
|                | Unidentified Pholcidae               | ✓ | ✓ | ✓ | ✓ | ✓ |   |
| Phrurolithidae | <i>Otacilia</i> sp.                  |   | ✓ | ✓ | ✓ | ✓ | ✓ |
|                | <i>Scotinella</i> sp.                |   | ✓ | ✓ | ✓ | ✓ | ✓ |



|               |                                    |   |   |   |   |   |   |
|---------------|------------------------------------|---|---|---|---|---|---|
| Physoglenidae | <i>Calcarsynotaxus sp.</i>         | ✓ | ✓ |   | ✓ | ✓ | ✓ |
|               | <i>Chileotaxus sans</i>            | ✓ | ✓ | ✓ | ✓ | ✓ | ✓ |
|               | <i>Meringa sp.1</i>                | ✓ | ✓ |   | ✓ | ✓ | ✓ |
|               | <i>Meringa sp.2</i>                | ✓ | ✓ |   | ✓ | ✓ | ✓ |
|               | <i>Meringa sp.3</i>                | ✓ | ✓ |   | ✓ | ✓ | ✓ |
|               | <i>Pahora sp.1</i>                 |   | ✓ |   | ✓ | ✓ | ✓ |
|               | <i>Pahora sp.2</i>                 | ✓ | ✓ | ✓ | ✓ | ✓ | ✓ |
|               | <i>Pahoroides sp.</i>              | ✓ | ✓ | ✓ | ✓ | ✓ |   |
|               | <i>Physoglenes sp.</i>             | ✓ | ✓ | ✓ | ✓ | ✓ | ✓ |
|               | <i>Tupua sp.</i>                   | ✓ | ✓ | ✓ | ✓ |   | ✓ |
|               | <i>Unidentified Physoglenidae</i>  | ✓ | ✓ |   | ✓ | ✓ | ✓ |
| Phyxelididae  | <i>Ambohima ranohira</i>           | ✓ | ✓ | ✓ | ✓ | ✓ | ✓ |
|               | <i>Ambohima sublima</i>            | ✓ |   |   | ✓ | ✓ |   |
|               | <i>Malaika longipes</i>            | ✓ |   |   | ✓ | ✓ | ✓ |
|               | <i>Phyxelida bifoveata</i>         | ✓ |   | ✓ | ✓ | ✓ | ✓ |
|               | <i>Phyxelida tangensis</i>         |   |   | ✓ | ✓ | ✓ |   |
|               | <i>Rahavavy fanivelona</i>         | ✓ | ✓ |   | ✓ | ✓ | ✓ |
|               | <i>Themacrys irrorata</i>          | ✓ |   |   | ✓ | ✓ | ✓ |
|               | <i>Vidole capensis</i>             | ✓ | ✓ | ✓ | ✓ | ✓ | ✓ |
|               | <i>Xevioso kulufa</i>              | ✓ |   |   | ✓ | ✓ | ✓ |
|               | <i>Xevioso orthomeles</i>          | ✓ |   | ✓ | ✓ | ✓ |   |
|               |                                    |   |   |   |   |   |   |
| Pimoidae      | <i>Nanoa enana</i>                 | ✓ |   |   | ✓ | ✓ |   |
|               | <i>Pimoa sp.1</i>                  | ✓ | ✓ |   | ✓ | ✓ | ✓ |
|               | <i>Pimoa sp.2</i>                  |   | ✓ |   | ✓ | ✓ | ✓ |
|               | <i>Pimoa sp.3</i>                  | ✓ | ✓ |   | ✓ | ✓ | ✓ |
|               | <i>Pimoa sp.4</i>                  | ✓ | ✓ | ✓ | ✓ | ✓ | ✓ |
|               | <i>Weintrauboa yele</i>            | ✓ | ✓ |   | ✓ | ✓ |   |
| Pisauridae    | <i>Bradystichus crispatus</i>      |   | ✓ | ✓ | ✓ | ✓ | ✓ |
|               | <i>Dendrolycosa cruciata</i>       | ✓ | ✓ |   | ✓ | ✓ | ✓ |
|               | <i>Dolomedes sp.</i>               | ✓ | ✓ | ✓ | ✓ | ✓ | ✓ |
|               | <i>Eurychoera aff. banna</i>       |   | ✓ |   | ✓ | ✓ | ✓ |
|               | <i>Hala sp.1</i>                   | ✓ | ✓ | ✓ | ✓ | ✓ |   |
|               | <i>Hala sp.2</i>                   | ✓ | ✓ | ✓ | ✓ | ✓ |   |
|               | <i>Hala sp.3</i>                   | ✓ |   | ✓ | ✓ | ✓ | ✓ |
|               | <i>Hala sp.4</i>                   |   |   |   | ✓ | ✓ |   |
|               | <i>Paracladycnis sp.</i>           |   | ✓ | ✓ |   | ✓ | ✓ |
|               | <i>Pisaura mira</i>                | ✓ | ✓ | ✓ | ✓ | ✓ | ✓ |
|               | <i>Thalassius esimoni</i>          |   | ✓ |   | ✓ | ✓ | ✓ |
|               | <i>Tolma sp.</i>                   | ✓ | ✓ | ✓ | ✓ | ✓ | ✓ |
|               | <i>Unidentified Pisauridae</i>     | ✓ | ✓ | ✓ | ✓ | ✓ | ✓ |
|               |                                    |   |   |   |   |   |   |
| Plectreuridae | <i>Kibramoa madrona</i>            | ✓ | ✓ | ✓ | ✓ | ✓ | ✓ |
|               | <i>Plectreurys deserta</i>         | ✓ | ✓ | ✓ | ✓ | ✓ |   |
|               | <i>Plectreurys tristis</i>         | ✓ | ✓ | ✓ | ✓ | ✓ | ✓ |
| Prodidomidae  | <i>Austrodomus zuluensis</i>       | ✓ | ✓ |   | ✓ | ✓ | ✓ |
|               | <i>Chilongius palmas/frayjorge</i> |   | ✓ |   | ✓ | ✓ | ✓ |
|               | <i>Lygromma sp.</i>                | ✓ | ✓ | ✓ |   | ✓ | ✓ |
|               | <i>Neozimiris pubescens</i>        | ✓ | ✓ | ✓ | ✓ | ✓ | ✓ |
|               | <i>Prodidomus flavipes</i>         | ✓ | ✓ |   |   | ✓ | ✓ |

|               |                                 |   |   |   |   |   |   |
|---------------|---------------------------------|---|---|---|---|---|---|
|               | <i>Prodidomus rufus</i>         | ✓ | ✓ | ✓ | ✓ | ✓ | ✓ |
|               | <i>Tricongius sp.</i>           | ✓ | ✓ |   | ✓ | ✓ |   |
| Psechridae    | <i>Fecenia sp.</i>              | ✓ | ✓ | ✓ | ✓ | ✓ | ✓ |
|               | <i>Psechrus senoculatus</i>     | ✓ | ✓ | ✓ | ✓ | ✓ |   |
|               | <i>Psechrus sp.1</i>            | ✓ | ✓ | ✓ | ✓ | ✓ | ✓ |
|               | <i>Psechrus sp.2</i>            | ✓ | ✓ | ✓ | ✓ | ✓ | ✓ |
| Psilodercidae | <i>Psilodermes sp.</i>          | ✓ |   |   | ✓ | ✓ | ✓ |
| Salticidae    | <i>Asemonea sp.</i>             |   | ✓ |   | ✓ | ✓ | ✓ |
|               | <i>Bacelarella aracula</i>      |   | ✓ |   | ✓ | ✓ | ✓ |
|               | <i>Bavia cf. aericeps</i>       | ✓ | ✓ |   | ✓ | ✓ |   |
|               | <i>Carrhotus sp.1</i>           | ✓ | ✓ |   | ✓ |   |   |
|               | <i>Carrhotus sp.2</i>           | ✓ | ✓ | ✓ | ✓ | ✓ | ✓ |
|               | <i>Cocalodes macellus</i>       | ✓ |   |   | ✓ | ✓ |   |
|               | <i>Cocalus murinus</i>          | ✓ |   |   | ✓ | ✓ | ✓ |
|               | <i>Freya sp.</i>                | ✓ | ✓ |   | ✓ | ✓ | ✓ |
|               | <i>Galianora sacha</i>          | ✓ | ✓ | ✓ | ✓ | ✓ | ✓ |
|               | <i>Hispo macfarlanei</i>        |   |   |   | ✓ |   |   |
|               | <i>Holcolaetis xerampelina</i>  |   | ✓ | ✓ | ✓ | ✓ | ✓ |
|               | <i>Hurius vulpinus</i>          | ✓ | ✓ |   | ✓ |   | ✓ |
|               | <i>Hypaeus sp.</i>              |   | ✓ |   | ✓ | ✓ |   |
|               | <i>Idastrandia sp.</i>          | ✓ | ✓ |   | ✓ | ✓ | ✓ |
|               | <i>Leikung sp.</i>              | ✓ | ✓ | ✓ |   | ✓ | ✓ |
|               | <i>Ligurra sp.</i>              | ✓ | ✓ | ✓ | ✓ |   | ✓ |
|               | <i>Lyssomanes sp.</i>           | ✓ | ✓ | ✓ | ✓ | ✓ | ✓ |
|               | <i>Massagris schisma</i>        |   | ✓ |   | ✓ | ✓ |   |
|               | <i>Mopsus sp.</i>               |   | ✓ |   | ✓ | ✓ | ✓ |
|               | <i>Naphrys pulex</i>            | ✓ | ✓ |   | ✓ | ✓ | ✓ |
|               | <i>Onomastus nigrimaculatus</i> | ✓ |   |   | ✓ | ✓ | ✓ |
|               | <i>Pelegrina aeneola</i>        | ✓ |   | ✓ | ✓ | ✓ | ✓ |
|               | <i>Phlegra sp.</i>              |   | ✓ | ✓ | ✓ | ✓ | ✓ |
|               | <i>Plexippus paykulli</i>       |   | ✓ | ✓ | ✓ | ✓ | ✓ |
|               | <i>Portia sp.</i>               | ✓ | ✓ | ✓ | ✓ | ✓ | ✓ |
|               | <i>Salticus scenicus</i>        | ✓ | ✓ | ✓ | ✓ | ✓ | ✓ |
|               | <i>Sitticus rainieri</i>        | ✓ | ✓ |   | ✓ | ✓ | ✓ |
|               | <i>Spartaeus thailandicus</i>   | ✓ |   |   | ✓ | ✓ | ✓ |
|               | <i>Thiania bhamoensis</i>       | ✓ | ✓ |   | ✓ | ✓ | ✓ |
|               | <i>Thiodinine sp.</i>           | ✓ | ✓ |   | ✓ | ✓ |   |
|               | <i>Yaginumanis wanlessi</i>     | ✓ |   |   | ✓ | ✓ | ✓ |
| Scytodidae    | <i>Scytodes globula</i>         |   |   |   | ✓ | ✓ |   |
|               | <i>Scytodes sp.1</i>            |   |   |   | ✓ | ✓ |   |
|               | <i>Scytodes sp.2</i>            |   |   |   | ✓ | ✓ | ✓ |
|               | <i>Scytodes thoracica</i>       |   | ✓ |   | ✓ | ✓ |   |
|               | <i>Stedocys pagodas</i>         | ✓ | ✓ | ✓ | ✓ | ✓ | ✓ |
| Segestriidae  | <i>Ariadna boesenbergi</i>      | ✓ | ✓ | ✓ | ✓ | ✓ | ✓ |
|               | <i>Ariadna insidiatrix</i>      | ✓ | ✓ | ✓ | ✓ | ✓ |   |
|               | <i>Segestria sp.1</i>           |   | ✓ | ✓ | ✓ | ✓ | ✓ |
|               | <i>Segestria sp.2</i>           | ✓ | ✓ | ✓ | ✓ | ✓ |   |
| Selenopidae   | <i>Anyphops barbertonensis</i>  | ✓ | ✓ |   | ✓ | ✓ | ✓ |

|                   |                                   |   |   |   |   |   |   |
|-------------------|-----------------------------------|---|---|---|---|---|---|
|                   | <i>Anyphops sp.</i>               | ✓ | ✓ | ✓ | ✓ | ✓ | ✓ |
|                   | <i>Garcorops madagascariensis</i> | ✓ | ✓ |   |   |   | ✓ |
|                   | <i>Hovops sp.</i>                 | ✓ | ✓ | ✓ | ✓ | ✓ | ✓ |
|                   | <i>Selenops cocheleti</i>         | ✓ | ✓ |   | ✓ | ✓ | ✓ |
|                   | <i>Selenops insularis</i>         | ✓ | ✓ | ✓ | ✓ | ✓ | ✓ |
|                   | <i>Selenops nesophilus</i>        | ✓ |   |   | ✓ | ✓ | ✓ |
| Senoculidae       | <i>Unidentified Senoculidae</i>   | ✓ | ✓ | ✓ | ✓ | ✓ |   |
| Sicariidae        | <i>Loxosceles deserta</i>         | ✓ | ✓ | ✓ | ✓ |   |   |
|                   | <i>Loxosceles sp.1</i>            | ✓ |   | ✓ | ✓ | ✓ | ✓ |
|                   | <i>Loxosceles sp.2</i>            | ✓ | ✓ | ✓ | ✓ | ✓ | ✓ |
|                   | <i>Loxosceles spiniceps</i>       | ✓ | ✓ |   | ✓ | ✓ | ✓ |
|                   | <i>Sicarius sp.1</i>              | ✓ |   | ✓ | ✓ | ✓ |   |
|                   | <i>Sicarius sp.2</i>              | ✓ | ✓ | ✓ | ✓ | ✓ | ✓ |
|                   | <i>Sicarius sp.3</i>              |   | ✓ | ✓ | ✓ | ✓ | ✓ |
| Sparassidae       | <i>Caayguara sp.</i>              | ✓ | ✓ | ✓ | ✓ |   | ✓ |
|                   | <i>Delena cancerides</i>          | ✓ | ✓ |   | ✓ |   | ✓ |
|                   | <i>Eusparassus sp.</i>            | ✓ | ✓ | ✓ | ✓ | ✓ | ✓ |
|                   | <i>Heteropoda venatoria</i>       | ✓ | ✓ | ✓ | ✓ | ✓ | ✓ |
|                   | <i>Isopoda parasbyi</i>           | ✓ | ✓ | ✓ | ✓ | ✓ | ✓ |
|                   | <i>Polybetes pythagoricus</i>     | ✓ |   | ✓ | ✓ | ✓ | ✓ |
|                   | <i>Pseudomicrommata longipes</i>  | ✓ | ✓ |   | ✓ | ✓ |   |
|                   | <i>Pseudopoda sp.</i>             |   | ✓ | ✓ | ✓ | ✓ | ✓ |
|                   | <i>Quemedice enigmaticus</i>      |   | ✓ |   | ✓ |   | ✓ |
|                   | <i>Sinopoda sp.</i>               | ✓ | ✓ | ✓ | ✓ | ✓ | ✓ |
|                   | <i>Stasina sp.1</i>               | ✓ |   |   | ✓ | ✓ | ✓ |
|                   | <i>Stasina sp.2</i>               | ✓ |   | ✓ | ✓ | ✓ |   |
| Stenochilidae     | <i>Colopea cf. virgata</i>        |   | ✓ | ✓ | ✓ |   |   |
|                   | <i>Colopea sp.1</i>               | ✓ | ✓ | ✓ | ✓ |   |   |
|                   | <i>Colopea sp.2</i>               | ✓ | ✓ |   | ✓ |   |   |
| Stiphidiidae      | <i>Aorangia sp.1</i>              | ✓ |   | ✓ | ✓ | ✓ | ✓ |
|                   | <i>Aorangia sp.2</i>              | ✓ | ✓ | ✓ |   | ✓ | ✓ |
|                   | <i>Aorangia sp.3</i>              | ✓ | ✓ |   | ✓ | ✓ | ✓ |
|                   | <i>Neolana sp.1</i>               | ✓ |   |   |   |   |   |
|                   | <i>Neolana sp.2</i>               | ✓ | ✓ | ✓ | ✓ | ✓ | ✓ |
|                   | <i>Neoramia setosa</i>            | ✓ | ✓ | ✓ | ✓ | ✓ | ✓ |
|                   | <i>Neoramia sp.1</i>              | ✓ | ✓ | ✓ | ✓ | ✓ | ✓ |
|                   | <i>Neoramia sp.2</i>              | ✓ | ✓ | ✓ | ✓ | ✓ | ✓ |
|                   | <i>Neoramia sp.3</i>              | ✓ | ✓ | ✓ | ✓ | ✓ | ✓ |
|                   | <i>Procambidgea sp.</i>           | ✓ | ✓ | ✓ | ✓ | ✓ |   |
|                   | <i>Stiphidion facetum</i>         | ✓ |   |   | ✓ | ✓ | ✓ |
|                   | <i>Stiphidion sp.1</i>            | ✓ | ✓ | ✓ | ✓ | ✓ | ✓ |
|                   | <i>Stiphidion sp.2</i>            | ✓ |   |   | ✓ | ✓ |   |
|                   | <i>Stiphidion sp.3</i>            | ✓ | ✓ | ✓ | ✓ | ✓ | ✓ |
| Stiphidiidae      | <i>Therlinya sp.</i>              | ✓ | ✓ | ✓ | ✓ | ✓ |   |
| Symphytognathidae | <i>Patu sp.1</i>                  | ✓ | ✓ |   | ✓ | ✓ | ✓ |
|                   | <i>Patu sp.2</i>                  | ✓ | ✓ |   | ✓ | ✓ | ✓ |
|                   | <i>Symphytognatha picta</i>       |   | ✓ | ✓ | ✓ | ✓ |   |
|                   | <i>Symphytognatha sp.</i>         |   |   |   | ✓ | ✓ | ✓ |

|                |                                        |   |   |   |   |   |   |
|----------------|----------------------------------------|---|---|---|---|---|---|
|                | <i>Unidentified Symphytognathidae1</i> | ✓ | ✓ |   | ✓ | ✓ | ✓ |
|                | <i>Unidentified Symphytognathidae2</i> | ✓ | ✓ | ✓ |   | ✓ | ✓ |
|                | <i>Unidentified Symphytognathidae3</i> | ✓ |   | ✓ | ✓ | ✓ | ✓ |
| Synotaxidae    | <i>Synotaxus sp.</i>                   | ✓ | ✓ | ✓ | ✓ | ✓ | ✓ |
| Telemidae      | <i>Usofila sp.</i>                     | ✓ | ✓ | ✓ | ✓ | ✓ |   |
| Tetramelemidae | <i>Indicoblemma monticola</i>          | ✓ | ✓ | ✓ | ✓ | ✓ | ✓ |
|                | <i>Shearella browni</i>                | ✓ | ✓ | ✓ | ✓ | ✓ |   |
|                | <i>Tetramelemma thamin</i>             |   | ✓ | ✓ | ✓ | ✓ | ✓ |
| Tetragnathidae | <i>Allende sp.</i>                     | ✓ | ✓ | ✓ | ✓ | ✓ | ✓ |
|                | <i>Azilia guatemalensis</i>            | ✓ | ✓ | ✓ | ✓ | ✓ | ✓ |
|                | <i>Chrysometa alboguttata</i>          |   | ✓ | ✓ | ✓ | ✓ | ✓ |
|                | <i>Cyrtognatha sp.</i>                 | ✓ | ✓ | ✓ | ✓ | ✓ | ✓ |
|                | <i>Dolichognatha sp.</i>               | ✓ | ✓ | ✓ | ✓ | ✓ |   |
|                | <i>Hispanognatha guttata</i>           | ✓ |   |   | ✓ | ✓ | ✓ |
|                | <i>Leucauge argyra</i>                 | ✓ | ✓ |   | ✓ | ✓ | ✓ |
|                | <i>Leucauge magnifica</i>              | ✓ | ✓ | ✓ | ✓ | ✓ |   |
|                | <i>Leucauge sp.1</i>                   | ✓ |   |   | ✓ | ✓ | ✓ |
|                | <i>Leucauge sp.2</i>                   | ✓ | ✓ | ✓ | ✓ | ✓ | ✓ |
|                | <i>Meta sp.</i>                        | ✓ | ✓ |   | ✓ | ✓ |   |
|                | <i>Metabus ebanoverde</i>              | ✓ | ✓ |   | ✓ | ✓ | ✓ |
|                | <i>Metellina merianae</i>              | ✓ | ✓ |   | ✓ | ✓ | ✓ |
|                | <i>Metellina segmentata</i>            | ✓ | ✓ | ✓ | ✓ | ✓ | ✓ |
|                | <i>Metleucauge yunohamensis</i>        | ✓ | ✓ |   | ✓ | ✓ |   |
|                | <i>Mollemeta edwardsi</i>              | ✓ | ✓ |   | ✓ | ✓ | ✓ |
|                | <i>Nanometa sp.</i>                    |   |   |   | ✓ | ✓ | ✓ |
|                | <i>Opadometa sp.</i>                   | ✓ | ✓ | ✓ | ✓ | ✓ | ✓ |
|                | <i>Orsinome cf. vethi</i>              | ✓ | ✓ |   | ✓ | ✓ | ✓ |
|                | <i>Pachygnatha sp.1</i>                | ✓ | ✓ | ✓ | ✓ | ✓ | ✓ |
|                | <i>Pachygnatha sp.2</i>                | ✓ |   |   | ✓ | ✓ | ✓ |
|                | <i>Pinkfloydia harveii</i>             | ✓ |   |   | ✓ | ✓ | ✓ |
|                | <i>Tetragnatha mandibulata</i>         | ✓ | ✓ | ✓ | ✓ | ✓ |   |
|                | <i>Tetragnatha sp.</i>                 | ✓ | ✓ | ✓ | ✓ | ✓ | ✓ |
|                | <i>Tetragnatha tantalus</i>            | ✓ | ✓ | ✓ | ✓ | ✓ | ✓ |
|                | <i>Tylorida sp.</i>                    |   |   |   | ✓ | ✓ | ✓ |
|                | <i>Tylorida striata</i>                |   |   |   | ✓ | ✓ | ✓ |
| Theraphosidae  | <i>Augacephalus junodi</i>             | ✓ | ✓ | ✓ | ✓ | ✓ | ✓ |
|                | <i>Harpactira sp.</i>                  | ✓ | ✓ | ✓ | ✓ | ✓ |   |
|                | <i>Harpactirella sp.1</i>              | ✓ | ✓ | ✓ | ✓ | ✓ | ✓ |
|                | <i>Harpactirella sp.2</i>              | ✓ | ✓ | ✓ | ✓ | ✓ | ✓ |
|                | <i>Poecilotheria metallica</i>         |   | ✓ |   | ✓ | ✓ |   |
|                | <i>Pseudotheraphosa apophysis</i>      | ✓ | ✓ | ✓ | ✓ | ✓ | ✓ |
|                | <i>Acanthoscurria sp.</i>              | ✓ | ✓ | ✓ | ✓ |   |   |
|                | <i>Aphonopelma sp.</i>                 | ✓ | ✓ |   | ✓ |   |   |
| Theridiidae    | <i>Anelosimus sp.</i>                  | ✓ | ✓ | ✓ | ✓ | ✓ | ✓ |
|                | <i>Argyrodes elevatus</i>              | ✓ | ✓ | ✓ | ✓ | ✓ | ✓ |
|                | <i>Chrysso octomaculata</i>            | ✓ | ✓ |   | ✓ | ✓ |   |
|                | <i>Crustulina sticta</i>               | ✓ | ✓ |   | ✓ | ✓ |   |
|                | <i>Dipoena cf. hortonii</i>            | ✓ | ✓ |   | ✓ |   |   |

|                   |                                         |   |   |   |   |   |   |
|-------------------|-----------------------------------------|---|---|---|---|---|---|
|                   | <i>Echinotheridion otium</i>            | ✓ | ✓ |   | ✓ | ✓ | ✓ |
|                   | <i>Enoplognatha caricis</i>             | ✓ | ✓ |   | ✓ | ✓ |   |
|                   | <i>Episinus affinis</i>                 | ✓ | ✓ |   | ✓ | ✓ |   |
|                   | <i>Episinus antipodianus</i>            | ✓ | ✓ | ✓ | ✓ | ✓ | ✓ |
|                   | <i>Euryopsis</i> sp.                    |   | ✓ | ✓ | ✓ | ✓ |   |
|                   | <i>Helvibis</i> cf. <i>longicauda</i>   | ✓ | ✓ |   | ✓ | ✓ |   |
|                   | <i>Keijia mneon</i>                     | ✓ | ✓ |   | ✓ | ✓ |   |
|                   | <i>Latrodectus geometricus</i>          | ✓ | ✓ |   | ✓ | ✓ |   |
|                   | <i>Latrodectus hesperus</i>             | ✓ |   | ✓ | ✓ | ✓ |   |
|                   | <i>Latrodectus</i> sp.                  | ✓ | ✓ |   | ✓ | ✓ |   |
|                   | <i>Neospintharus trigonum</i>           | ✓ | ✓ |   | ✓ | ✓ |   |
|                   | <i>Parasteatoda tepidariorum</i>        | ✓ | ✓ | ✓ | ✓ | ✓ | ✓ |
|                   | <i>Pholcomma hirsutum</i>               | ✓ | ✓ |   | ✓ | ✓ |   |
|                   | <i>Phoroncidia scutula</i>              | ✓ | ✓ | ✓ | ✓ | ✓ | ✓ |
|                   | <i>Spintharus flavidus</i>              | ✓ | ✓ |   | ✓ | ✓ |   |
|                   | <i>Steatoda triangulosa</i>             | ✓ | ✓ |   | ✓ | ✓ | ✓ |
|                   | <i>Takayus lyricus</i>                  | ✓ | ✓ |   | ✓ | ✓ | ✓ |
|                   | <i>Theridion</i> sp.                    | ✓ | ✓ |   | ✓ | ✓ | ✓ |
|                   | <i>Theridula opulenta</i>               | ✓ | ✓ |   | ✓ | ✓ |   |
|                   | <i>Thwaitesia</i> sp.                   | ✓ | ✓ |   | ✓ | ✓ |   |
|                   | <i>Thymoites unimaculatus</i>           | ✓ | ✓ |   | ✓ | ✓ |   |
|                   | <i>Tidarren sisypoides</i>              | ✓ | ✓ |   | ✓ | ✓ |   |
| Theridiosomatidae | <i>Coddingtonia euryopoides</i>         | ✓ | ✓ | ✓ |   | ✓ | ✓ |
|                   | <i>Epeirotypus brevipes</i>             | ✓ | ✓ |   | ✓ | ✓ | ✓ |
|                   | <i>Epeirotypus chavarría</i>            | ✓ | ✓ | ✓ | ✓ | ✓ | ✓ |
|                   | <i>Theridiosoma gemmosum</i>            | ✓ | ✓ | ✓ | ✓ | ✓ | ✓ |
| Thomisidae        | <i>Acentroscelus</i> sp.                | ✓ |   |   | ✓ | ✓ | ✓ |
|                   | <i>Alcimochthes limbatus</i>            | ✓ | ✓ | ✓ | ✓ | ✓ | ✓ |
|                   | <i>Amyciaea</i> sp.                     | ✓ | ✓ | ✓ | ✓ | ✓ | ✓ |
|                   | <i>Aphantochilus</i> sp.                | ✓ | ✓ | ✓ | ✓ | ✓ | ✓ |
|                   | <i>Boliscus</i> cf. <i>tuberculatus</i> | ✓ | ✓ | ✓ | ✓ | ✓ | ✓ |
|                   | <i>Borboropactus bituberculatus</i>     | ✓ | ✓ | ✓ | ✓ | ✓ |   |
|                   | <i>Borboropactus</i> sp.                | ✓ | ✓ |   | ✓ | ✓ | ✓ |
|                   | <i>Bucranium</i> sp.                    | ✓ |   |   | ✓ | ✓ | ✓ |
|                   | <i>Cebrenninus rugosus</i>              | ✓ | ✓ | ✓ | ✓ | ✓ | ✓ |
|                   | <i>Coenypha</i> sp.                     | ✓ |   | ✓ | ✓ | ✓ | ✓ |
|                   | <i>Diaea subdola</i>                    | ✓ | ✓ |   | ✓ | ✓ | ✓ |
|                   | <i>Epicadus heterogaster</i>            | ✓ | ✓ | ✓ | ✓ | ✓ |   |
|                   | <i>Epidius parvati</i>                  | ✓ |   |   |   |   | ✓ |
|                   | <i>Lysiteles coronatus</i>              | ✓ | ✓ |   | ✓ | ✓ |   |
|                   | <i>Misumena</i> sp.1                    | ✓ | ✓ |   | ✓ | ✓ | ✓ |
|                   | <i>Misumena</i> sp.2                    | ✓ | ✓ | ✓ | ✓ | ✓ |   |
|                   | <i>Misumenops nepenthicola</i>          | ✓ |   |   | ✓ | ✓ | ✓ |
|                   | <i>Monaeses</i> sp.                     | ✓ | ✓ | ✓ | ✓ | ✓ | ✓ |
|                   | <i>Onocolus</i> cf. <i>pentagonus</i>   | ✓ | ✓ |   | ✓ | ✓ | ✓ |
|                   | <i>Phrynarachne katoï</i>               | ✓ | ✓ |   | ✓ | ✓ |   |
|                   | <i>Pseudoporrhopis granum</i>           | ✓ | ✓ |   |   |   | ✓ |
|                   | <i>Runcinia albostrata</i>              | ✓ | ✓ |   |   |   | ✓ |

|              |                                           |   |   |   |   |   |   |
|--------------|-------------------------------------------|---|---|---|---|---|---|
|              | <i>Sidymella</i> sp.                      | ✓ |   | ✓ | ✓ | ✓ | ✓ |
|              | <i>Simorcus</i> cf. <i>asiaticus</i>      | ✓ | ✓ | ✓ | ✓ | ✓ | ✓ |
|              | <i>Stephanopsis</i> <i>ditissima</i>      | ✓ |   | ✓ | ✓ | ✓ | ✓ |
|              | <i>Stephanopsis</i> sp.1                  |   |   | ✓ | ✓ | ✓ | ✓ |
|              | <i>Stephanopsis</i> sp.2                  | ✓ | ✓ |   |   |   | ✓ |
|              | <i>Stephanopoides</i> <i>sexmaculata</i>  | ✓ | ✓ | ✓ | ✓ | ✓ | ✓ |
|              | <i>Stiphropus</i> sp.                     | ✓ | ✓ |   | ✓ | ✓ | ✓ |
|              | <i>Strophius</i> cf. <i>albofasciatus</i> | ✓ |   | ✓ | ✓ | ✓ | ✓ |
|              | <i>Strophius</i> sp.                      | ✓ |   | ✓ | ✓ | ✓ | ✓ |
|              | <i>Sydimella</i> sp.                      | ✓ | ✓ | ✓ |   |   | ✓ |
|              | <i>Synema</i> sp.                         |   | ✓ |   | ✓ | ✓ | ✓ |
|              | <i>Synstrophius</i> sp.                   | ✓ | ✓ |   | ✓ |   | ✓ |
|              | <i>Talaus</i> sp.                         | ✓ | ✓ | ✓ | ✓ | ✓ | ✓ |
|              | <i>Thomisops</i> <i>piger</i>             | ✓ | ✓ |   |   |   | ✓ |
|              | <i>Thomisus</i> <i>onustus</i>            | ✓ | ✓ | ✓ | ✓ | ✓ | ✓ |
|              | <i>Titidius</i> cf. <i>dubitatus</i>      | ✓ |   |   | ✓ | ✓ | ✓ |
|              | <i>Titidius</i> cf. <i>galbanatus</i>     | ✓ |   |   | ✓ | ✓ | ✓ |
|              | <i>Tmarus</i> <i>holmbergi</i>            | ✓ | ✓ | ✓ | ✓ | ✓ | ✓ |
|              | <i>Tobias</i> sp.                         | ✓ | ✓ | ✓ | ✓ | ✓ | ✓ |
|              | <i>Unidentified Thomisidae</i> 1          | ✓ |   |   | ✓ | ✓ | ✓ |
|              | <i>Unidentified Thomisidae</i> 2          | ✓ |   |   |   | ✓ |   |
|              | <i>Xysticus</i> sp.                       | ✓ | ✓ | ✓ | ✓ | ✓ | ✓ |
| Titanoecidae | <i>Goeldia</i> sp.1                       | ✓ | ✓ | ✓ |   | ✓ |   |
|              | <i>Goeldia</i> sp.2                       | ✓ | ✓ |   | ✓ | ✓ | ✓ |
|              | <i>Nurscia</i> <i>albofasciata</i>        | ✓ | ✓ |   | ✓ | ✓ |   |
|              | <i>Pandava</i> <i>sarasvati</i>           | ✓ | ✓ | ✓ | ✓ | ✓ | ✓ |
|              | <i>Titanoeca</i> sp.                      | ✓ | ✓ | ✓ | ✓ | ✓ |   |
|              | <i>Titanoeca</i> sp/ <i>Nurscia</i> sp    | ✓ |   | ✓ | ✓ |   | ✓ |
|              |                                           |   |   |   |   |   |   |
| Toxopidae    | <i>Gasparia</i> sp.                       | ✓ | ✓ |   | ✓ | ✓ |   |
|              | <i>Hapona</i> sp.                         | ✓ | ✓ |   | ✓ | ✓ | ✓ |
|              | <i>Laestrygones</i> sp.                   |   | ✓ |   | ✓ | ✓ |   |
|              | <i>Lamina</i> sp.1                        | ✓ | ✓ |   | ✓ | ✓ | ✓ |
|              | <i>Lamina</i> sp.2                        |   | ✓ | ✓ |   |   | ✓ |
|              | <i>Midgee</i> <i>thompsoni</i>            | ✓ |   |   | ✓ | ✓ |   |
|              | <i>Myro</i> sp.                           | ✓ | ✓ | ✓ | ✓ | ✓ | ✓ |
|              | <i>Ommatauxesis</i> <i>macrops</i>        | ✓ | ✓ |   | ✓ |   |   |
|              | <i>Otagoa</i> sp.1                        | ✓ | ✓ | ✓ | ✓ | ✓ | ✓ |
|              | <i>Otagoa</i> sp.2                        | ✓ | ✓ | ✓ | ✓ | ✓ | ✓ |
|              | <i>Toxops</i> sp.                         | ✓ | ✓ | ✓ | ✓ | ✓ |   |
| Trachelidae  | <i>Meriola</i> <i>barrosi</i>             | ✓ | ✓ | ✓ | ✓ | ✓ | ✓ |
|              | <i>Orthobula</i> sp.1                     | ✓ | ✓ |   |   | ✓ | ✓ |
|              | <i>Orthobula</i> sp.2                     |   |   |   | ✓ | ✓ | ✓ |
|              | <i>Paccius</i> cf. <i>scharffi</i>        | ✓ | ✓ | ✓ | ✓ | ✓ | ✓ |
|              | <i>Paccius</i> sp.                        | ✓ | ✓ | ✓ | ✓ | ✓ | ✓ |
|              | <i>Thysanina</i> <i>absolvo</i>           |   |   |   | ✓ | ✓ | ✓ |
|              | <i>Trachelas</i> sp.                      | ✓ | ✓ | ✓ | ✓ | ✓ | ✓ |
|              | <i>Trachelopachys</i> <i>sericeus</i>     | ✓ | ✓ |   | ✓ | ✓ | ✓ |
|              | <i>Utivarachna</i> cf. <i>phyllicola</i>  | ✓ | ✓ |   | ✓ | ✓ | ✓ |
|              |                                           |   |   |   |   |   |   |

|                  |                                      |   |   |   |   |   |   |
|------------------|--------------------------------------|---|---|---|---|---|---|
|                  | <i>Utivarachna gr. kinabaluensis</i> | ✓ | ✓ |   |   | ✓ |   |
| Trechaleidae     | <i>Cupiennius sp.</i>                | ✓ | ✓ | ✓ | ✓ | ✓ | ✓ |
|                  | <i>Trechaleoides biocellata</i>      | ✓ | ✓ | ✓ | ✓ |   | ✓ |
| Trochanteriidae  | <i>Desognaphosa yabbra</i>           |   |   |   | ✓ | ✓ |   |
|                  | <i>Doliomalus sp.</i>                | ✓ | ✓ | ✓ |   | ✓ | ✓ |
|                  | <i>Morebilus fumosus</i>             | ✓ | ✓ | ✓ | ✓ | ✓ |   |
|                  | <i>Platorish jimna</i>               |   | ✓ |   | ✓ | ✓ | ✓ |
|                  | <i>Platyoides walteri</i>            | ✓ |   | ✓ | ✓ | ✓ | ✓ |
|                  | <i>Rebilus sp.</i>                   |   | ✓ |   | ✓ |   | ✓ |
|                  | <i>Tinytrema sandy</i>               | ✓ | ✓ | ✓ | ✓ | ✓ | ✓ |
|                  | <i>Trachycosmus sculptilis</i>       | ✓ | ✓ |   | ✓ | ✓ | ✓ |
| Trogloraptoridae | <i>Trogloraptor marchingtoni</i>     | ✓ |   |   | ✓ | ✓ | ✓ |
|                  | <i>Trogloraptor sp.</i>              | ✓ |   |   | ✓ | ✓ | ✓ |
| Udubidae         | <i>Raecius sp.</i>                   | ✓ | ✓ | ✓ | ✓ | ✓ | ✓ |
|                  | <i>Uduba sp. 1</i>                   | ✓ | ✓ | ✓ | ✓ | ✓ | ✓ |
|                  | <i>Uduba sp. 2</i>                   |   |   |   | ✓ | ✓ |   |
|                  | <i>Zorodictyna sp. 1</i>             | ✓ | ✓ | ✓ | ✓ | ✓ |   |
|                  | <i>Zorodictyna sp. 2</i>             | ✓ |   | ✓ | ✓ | ✓ | ✓ |
|                  | <i>Zorodictyna sp. 3</i>             | ✓ | ✓ | ✓ | ✓ | ✓ |   |
| Uloboridae       | <i>Hyptiotes cavatus</i>             | ✓ | ✓ | ✓ | ✓ | ✓ |   |
|                  | <i>Miagrammopos sp.</i>              | ✓ | ✓ |   | ✓ |   | ✓ |
|                  | <i>Octonoba sinensis</i>             | ✓ | ✓ | ✓ | ✓ | ✓ |   |
|                  | <i>Tangaroa sp.</i>                  | ✓ | ✓ |   | ✓ | ✓ |   |
|                  | <i>Uloborus diversus</i>             | ✓ | ✓ |   | ✓ | ✓ | ✓ |
|                  | <i>Uloborus sp.</i>                  | ✓ |   | ✓ | ✓ | ✓ | ✓ |
|                  | <i>Waitkera waitakerensis</i>        | ✓ | ✓ |   | ✓ | ✓ | ✓ |
| Viridasiidae     | <i>Mahafalytenus sp.</i>             | ✓ | ✓ | ✓ | ✓ | ✓ | ✓ |
|                  | <i>Unidentified Viridassidae</i>     | ✓ | ✓ |   | ✓ | ✓ | ✓ |
|                  | <i>Vulsor sp.</i>                    | ✓ | ✓ | ✓ | ✓ | ✓ | ✓ |
| Zodariidae       | <i>Asceua sp. 1</i>                  |   |   |   | ✓ | ✓ | ✓ |
|                  | <i>Asceua sp. 2</i>                  | ✓ | ✓ |   | ✓ | ✓ | ✓ |
|                  | <i>Caesetius bevisi</i>              |   | ✓ |   | ✓ | ✓ |   |
|                  | <i>Capheris sp.</i>                  | ✓ | ✓ |   | ✓ | ✓ |   |
|                  | <i>Chariobas cylindraceus</i>        |   |   |   | ✓ | ✓ | ✓ |
|                  | <i>Cryptothele sp.</i>               | ✓ | ✓ | ✓ | ✓ |   |   |
|                  | <i>Cybaeodamus sp.</i>               | ✓ | ✓ | ✓ | ✓ | ✓ | ✓ |
|                  | <i>Cydrela sp.</i>                   |   | ✓ | ✓ | ✓ | ✓ |   |
|                  | <i>Cyrioctea spinifera</i>           | ✓ | ✓ |   | ✓ | ✓ | ✓ |
|                  | <i>Diores femoralis</i>              | ✓ | ✓ |   | ✓ | ✓ | ✓ |
|                  | <i>Habronestes raveni</i>            | ✓ | ✓ | ✓ | ✓ | ✓ | ✓ |
|                  | <i>Hermippus septemguttatus</i>      | ✓ | ✓ | ✓ | ✓ | ✓ |   |
|                  | <i>Hetaerica scenica</i>             |   |   |   | ✓ | ✓ |   |
|                  | <i>Leprolochus birabeni</i>          | ✓ | ✓ | ✓ | ✓ | ✓ |   |
|                  | <i>Lutica sp.</i>                    | ✓ | ✓ | ✓ | ✓ | ✓ | ✓ |
|                  | <i>Mallinella sp. 1</i>              |   |   |   | ✓ |   | ✓ |
|                  | <i>Mallinella sp. 2</i>              | ✓ | ✓ | ✓ | ✓ | ✓ | ✓ |
|                  | <i>Platnickia elegans</i>            | ✓ | ✓ | ✓ | ✓ | ✓ | ✓ |
|                  | <i>Psammoduon cf. deserticola</i>    | ✓ | ✓ | ✓ | ✓ | ✓ | ✓ |

|            |                                       |   |   |   |   |   |   |
|------------|---------------------------------------|---|---|---|---|---|---|
|            | <i>Psammorygma</i> sp.                |   | ✓ |   | ✓ | ✓ | ✓ |
|            | <i>Storena cyanea</i>                 | ✓ | ✓ | ✓ | ✓ | ✓ | ✓ |
|            | <i>Subasteron daviesae</i>            | ✓ | ✓ | ✓ | ✓ | ✓ | ✓ |
|            | <i>Suffasia</i> sp.                   |   |   | ✓ | ✓ | ✓ | ✓ |
|            | <i>Tenedos</i> nr. <i>persulcatus</i> | ✓ |   |   | ✓ | ✓ | ✓ |
|            | <i>Tenedos serrulatus</i>             | ✓ | ✓ | ✓ | ✓ | ✓ | ✓ |
|            | <i>Zodariellum</i> sp.                | ✓ | ✓ | ✓ | ✓ | ✓ | ✓ |
|            | <i>Zodarion italicum</i>              | ✓ | ✓ | ✓ | ✓ | ✓ | ✓ |
| Zoropsidae | <i>Austrotengella toddae</i>          | ✓ |   |   | ✓ |   | ✓ |
|            | <i>Ciniflrella</i> sp.                | ✓ | ✓ | ✓ | ✓ | ✓ | ✓ |
|            | <i>Griswoldia transversa</i>          | ✓ |   | ✓ | ✓ | ✓ |   |
|            | <i>Kilyana hendersoni</i>             | ✓ | ✓ |   | ✓ | ✓ | ✓ |
|            | <i>Kilyana</i> sp.                    | ✓ | ✓ |   | ✓ | ✓ | ✓ |
|            | <i>Liocranoides archeri</i>           | ✓ | ✓ | ✓ | ✓ | ✓ | ✓ |
|            | <i>Phanotea sathegyna</i>             | ✓ | ✓ | ✓ | ✓ | ✓ | ✓ |
|            | <i>Tengella</i> sp.                   | ✓ | ✓ | ✓ | ✓ | ✓ | ✓ |
|            | <i>Uliodon</i> sp.1                   | ✓ | ✓ | ✓ | ✓ | ✓ | ✓ |
|            | <i>Uliodon</i> sp.2                   | ✓ | ✓ | ✓ | ✓ | ✓ | ✓ |
|            | <i>Uliodon</i> sp.3                   | ✓ | ✓ | ✓ | ✓ | ✓ |   |
|            | <i>Zorocrates fuscus</i>              | ✓ | ✓ |   | ✓ | ✓ | ✓ |
|            | <i>Zorocrates</i> sp.                 | ✓ | ✓ | ✓ | ✓ | ✓ | ✓ |
|            | <i>Zoropsis spinimana</i>             | ✓ | ✓ | ✓ | ✓ | ✓ | ✓ |



**Table S4.** Information on the plots, taxonomic diversity (TD) and values of phylogenetic diversity (PD) estimated with every tree. \*PD values of the non-ultrametric tree Mc128 were rescaled by dividing them by 2, to make them comparable to the remaining PD values.

**Time-stamped trees**

| Plot number | Archipelago | Region        | Plot                | Forest Type                 | alpha_TD | A             | C          | E           | G         | A vs. C      | A vs. E      | A vs. G      |
|-------------|-------------|---------------|---------------------|-----------------------------|----------|---------------|------------|-------------|-----------|--------------|--------------|--------------|
|             |             |               |                     |                             |          | BLc128_tc_cal | BLc128_cal | BLc1_tc_cal | BLc1_cal  | % difference | % difference | % difference |
| 1           | IP          | Aigüestortes  | Aigüestortes_1      | <i>Quercus pubescens</i>    | 65       | 5,174,402     | 5,180,520  | 5,593,700   | 6,077,636 | 0.118235885  | 8.103313194  | 17.45581422  |
| 2           | IP          | Aigüestortes  | Aigüestortes_2      | <i>Quercus pubescens</i>    | 72       | 5,441,465     | 5,517,923  | 6,072,182   | 6,676,224 | 1.405099546  | 11.59094104  | 22.69166484  |
| 3           | IP          | Cabañeros     | Cabañeros_1         | <i>Quercus pyrenaica</i>    | 73       | 5,382,081     | 5,425,769  | 6,123,296   | 6,413,759 | 0.81173063   | 13.77190347  | 19.16875647  |
| 4           | IP          | Cabañeros     | Cabañeros_2         | <i>Quercus pyrenaica</i>    | 62       | 4,860,971     | 4,904,933  | 5,391,772   | 5,753,708 | 0.90438721   | 10.91964959  | 18.36540477  |
| 5           | IP          | Cabañeros     | Cabañeros_3         | <i>Quercus faginea</i>      | 76       | 5,948,708     | 6,010,093  | 6,490,470   | 6,859,782 | 1.031904743  | 9.107221266  | 15.31549372  |
| 6           | IP          | Cabañeros     | Cabañeros_4         | <i>Quercus faginea</i>      | 84       | 6,175,569     | 6,167,946  | 6,761,602   | 7,380,611 | -0.123438018 | 9.489538535  | 19.51305216  |
| 7           | IP          | Monfragüe     | Monfragüe_1         | <i>Quercus faginea</i>      | 54       | 4,987,145     | 5,055,054  | 5,238,043   | 5,872,608 | 1.361680882  | 5.03089443   | 17.75490787  |
| 8           | IP          | Monfragüe     | Monfragüe_2         | <i>Quercus faginea</i>      | 43       | 4,577,164     | 4,637,718  | 4,898,198   | 5,386,165 | 1.322958933  | 7.013819037  | 17.67472173  |
| 9           | IP          | Ordesa        | Ordesa_1            | <i>Quercus subpyrenaica</i> | 77       | 5,422,895     | 5,532,640  | 5,800,729   | 6,384,574 | 2.023734555  | 6.967385502  | 17.73368284  |
| 10          | IP          | Ordesa        | Ordesa_2            | <i>Quercus subpyrenaica</i> | 92       | 6,854,542     | 6,952,536  | 7,368,938   | 8,182,975 | 1.42962141   | 7.50445471   | 19.38033205  |
| 11          | IP          | Picos         | Picos_1             | <i>Quercus petraea</i>      | 51       | 4,167,726     | 4,226,101  | 4,649,244   | 5,009,007 | 1.4006439    | 11.55349464  | 20.18561201  |
| 12          | IP          | Picos         | Picos_2             | <i>Quercus faginea</i>      | 84       | 5,921,794     | 6,070,435  | 6,471,467   | 7,304,362 | 2.510067051  | 9.282204008  | 23.34711407  |
| 13          | IP          | Picos         | Picos_3             | <i>Quercus petraea</i>      | 58       | 4,805,754     | 4,844,310  | 5,363,729   | 5,734,045 | 0.802288257  | 11.61056101  | 19.31624049  |
| 14          | IP          | Picos         | Picos_4             | <i>Quercus faginea</i>      | 101      | 6,777,560     | 6,899,926  | 7,628,467   | 8,281,974 | 1.805458011  | 12.55476897  | 22.19698535  |
| 15          | IP          | Sierra_Nevada | Sierra_Nevada_1     | <i>Quercus pyrenaica</i>    | 71       | 6,025,919     | 5,836,586  | 6,369,478   | 6,997,962 | -3.141977182 | 5.701354432  | 16.13103329  |
| 16          | IP          | Sierra_Nevada | Sierra_Nevada_2     | <i>Quercus pyrenaica</i>    | 70       | 5,257,451     | 5,309,701  | 5,710,396   | 6,343,538 | 0.993827617  | 8.615296652  | 20.65805273  |
| 17          | Canary      | GOM           | Acebinos            | Laurel Forest               | 24       | 3,393,272     | 3,429,910  | 3,437,601   | 3,811,265 | 1.07972482   | 1.306379212  | 12.31828748  |
| 18          | Canary      | GOM           | Apartacaminos       | Laurel Forest               | 19       | 2,216,012     | 2,209,309  | 2,332,088   | 2,538,860 | -0.302480311 | 5.238058278  | 14.56887418  |
| 19          | Canary      | GOM           | Cedro               | Laurel Forest               | 26       | 3,276,012     | 3,317,345  | 3,427,363   | 3,697,931 | 1.261686465  | 4.619976972  | 12.87904318  |
| 20          | Canary      | GOM           | Encima_Hayas        | Laurel Forest               | 32       | 3,632,448     | 3,685,204  | 3,851,431   | 4,178,719 | 1.452353895  | 6.028524015  | 15.03864611  |
| 21          | Canary      | GOM           | Fuentsanta          | Laurel Forest               | 29       | 3,524,552     | 3,550,919  | 3,704,750   | 4,026,631 | 0.748095077  | 5.112649778  | 14.24518634  |
| 22          | Canary      | GOM           | Meseta_Vallehermoso | Laurel Forest               | 29       | 3,467,139     | 3,568,459  | 3,640,165   | 3,975,710 | 2.922294145  | 4.990454666  | 14.66831875  |
| 23          | Canary      | GOM           | Reventon_Oscuro     | Laurel Forest               | 25       | 3,088,599     | 3,059,951  | 3,208,921   | 3,580,715 | -0.927540286 | 3.895682152  | 15.93330827  |

|    |         |      |                  |               |    |           |           |           |           |              |              |             |
|----|---------|------|------------------|---------------|----|-----------|-----------|-----------|-----------|--------------|--------------|-------------|
| 24 | Canary  | TEN  | Aguas_Negras     | Laurel Forest | 19 | 2,403,432 | 2,410,368 | 2,555,958 | 2,714,819 | 0.28858732   | 6.34617497   | 12.95593135 |
| 25 | Canary  | TEN  | Bco_Nieto        | Laurel Forest | 30 | 3,167,366 | 3,203,982 | 3,419,100 | 3,656,922 | 1.156039435  | 7.947739541  | 15.45624977 |
| 26 | Canary  | TEN  | Cabezo_Tejo      | Laurel Forest | 21 | 2,721,384 | 2,674,495 | 2,837,288 | 3,126,082 | -1.7229836   | 4.259009386  | 14.87103621 |
| 27 | Canary  | TEN  | Chinobre         | Laurel Forest | 21 | 2,350,445 | 2,370,542 | 2,545,537 | 2,705,825 | 0.85502958   | 8.300215491  | 15.1196901  |
| 28 | Canary  | TEN  | Hoya_Ijuana      | Laurel Forest | 17 | 2,505,082 | 2,446,393 | 2,537,203 | 2,761,443 | -2.342797561 | 1.282233476  | 10.23363706 |
| 29 | Canary  | TEN  | Monte_Aguirre    | Laurel Forest | 28 | 3,059,142 | 3,029,160 | 3,333,445 | 3,650,677 | -0.980078728 | 8.966664509  | 19.33663099 |
| 30 | Canary  | TEN  | Moquinal         | Laurel Forest | 26 | 3,050,604 | 3,083,051 | 3,239,434 | 3,535,652 | 1.063625433  | 6.189921734  | 15.90006438 |
| 31 | Canary  | TEN  | Pijaral          | Laurel Forest | 17 | 2,106,578 | 2,104,969 | 2,275,191 | 2,409,269 | -0.076379797 | 8.004118528  | 14.36884844 |
| 32 | Canary  | TEN  | Vueltas_Taganana | Laurel Forest | 16 | 2,052,137 | 2,028,389 | 2,126,743 | 2,226,824 | -1.15723268  | 3.635527258  | 8.51244337  |
| 33 | Canary  | TEN  | Zapata           | Laurel Forest | 23 | 2,601,174 | 2,579,385 | 2,801,068 | 3,045,617 | -0.837660226 | 7.684760804  | 17.08624644 |
| 34 | Madeira | MAD1 | Funduras         | Laurel Forest | 21 | 2,488,912 | 2,464,014 | 2,643,845 | 2,832,273 | -1.000356782 | 6.224928804  | 13.79562636 |
| 35 | Madeira | MAD1 | Queimadas        | Laurel Forest | 23 | 2,374,182 | 2,350,463 | 2,574,015 | 2,713,688 | -0.999038827 | 8.416920017  | 14.29991467 |
| 36 | Madeira | MAD1 | Ribeiro_Bonito_1 | Laurel Forest | 21 | 2,571,804 | 2,577,200 | 2,707,171 | 2,853,370 | 0.209813812  | 5.263503751  | 10.94819045 |
| 37 | Madeira | MAD1 | Ribeiro_Bonito_2 | Laurel Forest | 22 | 3,036,746 | 2,995,698 | 3,135,576 | 3,383,734 | -1.351710021 | 3.25447041   | 11.42630961 |
| 38 | Madeira | MAD1 | Ribeiro_Bonito_3 | Laurel Forest | 32 | 3,617,887 | 3,604,212 | 3,772,235 | 4,203,691 | -0.37798306  | 4.266247122  | 16.19188217 |
| 39 | Madeira | MAD1 | Ribeiro_Frio     | Laurel Forest | 25 | 2,558,385 | 2,587,803 | 2,813,958 | 2,989,776 | 1.149866029  | 9.989622359  | 16.86184839 |
| 40 | Madeira | MAD2 | Chao_Ribeira     | Laurel Forest | 22 | 2,434,563 | 2,385,224 | 2,583,581 | 2,812,334 | -2.026606007 | 6.120934229  | 15.51699422 |
| 41 | Madeira | MAD2 | Encumeada        | Laurel Forest | 24 | 2,460,675 | 2,440,529 | 2,639,281 | 2,769,934 | -0.818718441 | 7.258414866  | 12.56805551 |
| 42 | Madeira | MAD2 | Fanal_1          | Laurel Forest | 26 | 2,978,205 | 2,973,572 | 3,146,337 | 3,368,867 | -0.155563502 | 5.645413932  | 13.11736432 |
| 43 | Madeira | MAD2 | Fanal_2          | Laurel Forest | 21 | 2,494,574 | 2,481,658 | 2,672,911 | 2,809,304 | -0.517763754 | 7.148996181  | 12.61658303 |
| 44 | Madeira | MAD2 | Fanal_3          | Laurel Forest | 24 | 2,899,402 | 2,880,276 | 2,999,189 | 3,210,246 | -0.659653266 | 3.441640725  | 10.72096936 |
| 45 | Madeira | MAD2 | Ginjas           | Laurel Forest | 22 | 2,265,673 | 2,268,767 | 2,526,681 | 2,700,503 | 0.136559865  | 11.52010904  | 19.19208994 |
| 46 | Azores  | Pico | Caveiro_2        | Laurel Forest | 18 | 1,851,686 | 1,857,773 | 1,887,262 | 2,100,488 | 0.328727441  | 1.921276069  | 13.43651137 |
| 47 | Azores  | Pico | Caveiro_Base     | Laurel Forest | 19 | 1,955,601 | 1,960,951 | 1,979,259 | 2,205,515 | 0.273573188  | 1.209755978  | 12.77939621 |
| 48 | Azores  | Pico | Caveiro_Paul     | Laurel Forest | 19 | 1,966,929 | 1,953,802 | 2,046,770 | 2,168,393 | -0.667385554 | 4.059170412  | 10.24256595 |
| 49 | Azores  | Pico | Chao_Verde       | Laurel Forest | 16 | 2,147,657 | 2,148,409 | 2,146,477 | 2,246,127 | 0.035014902  | -0.054943597 | 4.58499658  |
| 50 | Azores  | Pico | Euphorbias       | Laurel Forest | 16 | 1,890,330 | 1,892,490 | 1,914,921 | 2,136,843 | 0.114265763  | 1.300883973  | 13.04073892 |
| 51 | Azores  | Pico | Pico_Redondo     | Laurel Forest | 16 | 1,822,495 | 1,797,031 | 1,886,403 | 1,943,351 | -1.397205479 | 3.506621417  | 6.631348783 |

|    |        |     |                    |               |    |           |           |           |           |              |             |             |             |
|----|--------|-----|--------------------|---------------|----|-----------|-----------|-----------|-----------|--------------|-------------|-------------|-------------|
| 52 | Azores | TER | Caldeira_Silvia    | Laurel Forest | 17 | 1,955,481 | 1,942,289 | 2,065,761 | 2,147,680 | -0.674616629 | 5.639533189 | 9.828732675 |             |
| 53 | Azores | TER | Chambre_A          | Laurel Forest | 18 | 2,256,936 | 2,237,638 | 2,403,359 | 2,520,809 | -0.855053045 | 6.487689505 | 11.69164744 |             |
| 54 | Azores | TER | Lagoa_Pinheiro_B   | Laurel Forest | 22 | 2,135,406 | 2,159,184 | 2,378,129 | 2,564,170 | 1.113511904  | 11.36659727 | 20.07880469 |             |
| 55 | Azores | TER | Lagoinha_B         | Laurel Forest | 14 | 1,604,176 | 1,610,330 | 1,662,392 | 1,712,442 | 0.383623742  | 3.629028236 | 6.749010084 |             |
| 56 | Azores | TER | Lomba              | Laurel Forest | 17 | 2,224,094 | 2,200,119 | 2,342,310 | 2,429,409 | -1.077967028 | 5.315242971 | 9.231399392 |             |
| 57 | Azores | TER | Morro_Assombrado   | Laurel Forest | 20 | 2,131,524 | 2,118,815 | 2,292,317 | 2,401,797 | -0.596240061 | 7.543569765 | 12.67980093 |             |
| 58 | Azores | TER | Pico_Alto_Nascente | Laurel Forest | 20 | 2,210,873 | 2,199,587 | 2,350,186 | 2,516,407 | -0.510477083 | 6.301266513 | 13.81960882 |             |
| 59 | Azores | TER | Pico_X_B           | Laurel Forest | 21 | 2,509,833 | 2,497,998 | 2,646,959 | 2,814,002 | -0.471545318 | 5.463550762 | 12.11909318 |             |
| 60 | Azores | TER | Terra_Brava_B      | Laurel Forest | 20 | 2,149,260 | 2,123,564 | 2,263,013 | 2,347,416 | -1.195574291 | 5.292658869 | 9.219731442 |             |
| 61 | Azores | TER | Terra_Brava_A      | Laurel Forest | 15 | 2,239,882 | 2,224,215 | 2,359,804 | 2,494,234 | -0.699456489 | 5.353942752 | 11.3555982  |             |
|    |        |     |                    |               |    |           |           |           |           | Overall      | 0.079156531 | 6.483802242 | 14.67419875 |
|    |        |     |                    |               |    |           |           |           |           |              | 0.07%       | 7%          | 14%         |

# Non-ultrametric trees

|             |             |               | B          | D          | F          | H          | I *        | J          | B vs. D      | B vs. F      | B vs. H      | B vs. I      | B vs. J      |
|-------------|-------------|---------------|------------|------------|------------|------------|------------|------------|--------------|--------------|--------------|--------------|--------------|
| Plot number | Archipelago | Region        | BLc128_tc  | BLc128     | BLc1_tc    | BLc1       | BLc128/2 * | Lc1        | % difference |
| 1           | IP          | Aigüestortes  | 14.408.847 | 14.535.374 | 14.603.697 | 14.714.585 | 12.446.251 | 17.073.967 | 0,87812023   | 1,35229418   | 2,12187693   | -13,620771   | 18,496414    |
| 2           | IP          | Aigüestortes  | 16.138.781 | 16.267.034 | 17.199.530 | 17.326.515 | 14.225.377 | 18.839.630 | 0,79468827   | 6,57267113   | 7,35950255   | -11,855939   | 16,7351487   |
| 3           | IP          | Cabañeros     | 15.981.592 | 15.999.068 | 17.341.983 | 17.786.484 | 13.517.618 | 19.196.781 | 0,10935081   | 8,51223708   | 11,2935683   | -15,417575   | 20,1180771   |
| 4           | IP          | Cabañeros     | 15.379.159 | 15.370.223 | 15.355.524 | 15.258.210 | 14.096.802 | 16.366.295 | -0,0581046   | -0,153682    | -0,7864474   | -8,338281    | 6,41866047   |
| 5           | IP          | Cabañeros     | 18.435.639 | 18.373.362 | 17.590.132 | 17.256.205 | 15.159.129 | 19.221.895 | -0,3378077   | -4,5862636   | -6,3975759   | -17,772698   | 4,2648698    |
| 6           | IP          | Cabañeros     | 18.464.790 | 18.494.058 | 18.463.473 | 18.474.035 | 15.972.730 | 20.349.420 | 0,15850708   | -0,0071325   | 0,05006827   | -13,496284   | 10,2066149   |
| 7           | IP          | Monfragüe     | 14.011.145 | 14.008.460 | 13.868.146 | 13.808.183 | 11.907.101 | 15.871.042 | -0,0191633   | -1,020609    | -1,4485754   | -15,016935   | 13,2744112   |
| 8           | IP          | Monfragüe     | 13.007.600 | 12.979.396 | 13.363.505 | 13.382.351 | 11.148.797 | 14.846.021 | -0,2168271   | 2,73613118   | 2,88101571   | -14,29013    | 14,1334374   |
| 9           | IP          | Ordesa        | 15.923.482 | 15.959.907 | 16.986.245 | 16.941.628 | 13.450.452 | 19.069.984 | 0,22875022   | 6,67418722   | 6,39399096   | -15,530714   | 19,7601379   |
| 10          | IP          | Ordesa        | 19.108.717 | 19.111.510 | 20.773.966 | 20.804.425 | 16.422.033 | 22.705.686 | 0,01461637   | 8,71460392   | 8,87400237   | -14,059992   | 18,8237075   |
| 11          | IP          | Picos         | 11.084.333 | 11.098.161 | 12.291.283 | 12.244.280 | 9.796.815  | 14.179.032 | 0,12475266   | 10,8887923   | 10,4647433   | -11,615656   | 27,919578    |
| 12          | IP          | Picos         | 17.534.138 | 17.594.846 | 18.429.475 | 18.737.430 | 15.245.546 | 20.854.447 | 0,34622746   | 5,10625045   | 6,86256718   | -13,05221    | 18,9362545   |
| 13          | IP          | Picos         | 13.480.659 | 13.532.818 | 14.554.072 | 14.602.653 | 11.575.820 | 16.771.005 | 0,38691729   | 7,96261518   | 8,32299074   | -14,130162   | 24,4079017   |
| 14          | IP          | Picos         | 19.507.597 | 19.566.011 | 21.353.700 | 21.483.211 | 16.455.007 | 24.265.640 | 0,29944231   | 9,46350799   | 10,1274083   | -15,648211   | 24,3907181   |
| 15          | IP          | Sierra_Nevada | 17.609.572 | 17.574.246 | 18.059.834 | 17.906.340 | 14.971.771 | 19.483.287 | -0,2006068   | 2,5569162    | 1,68526526   | -14,979362   | 10,6403211   |
| 16          | IP          | Sierra_Nevada | 15.294.665 | 15.399.697 | 16.418.356 | 16.314.031 | 13.421.380 | 17.844.558 | 0,68672312   | 7,34694745   | 6,66484686   | -12,247967   | 16,6717807   |
| 17          | Canary      | GOM           | 10.088.202 | 10.039.506 | 9.641.705  | 9.500.484  | 9.072.245  | 9.285.913  | -0,4827025   | -4,4259324   | -5,8257953   | -10,070749   | -7,9527452   |
| 18          | Canary      | GOM           | 5.874.424  | 5.899.326  | 6.573.975  | 6.488.596  | 5.488.385  | 7.307.925  | 0,42390539   | 11,9084186   | 10,4550165   | -6,5715209   | 24,4024095   |
| 19          | Canary      | GOM           | 9.884.893  | 9.863.240  | 10.043.710 | 9.721.819  | 9.175.736  | 10.024.082 | -0,2190514   | 1,60666383   | -1,6497295   | -7,1741495   | 1,4080982    |
| 20          | Canary      | GOM           | 10.389.271 | 10.433.920 | 10.560.453 | 10.477.213 | 8.845.910  | 11.059.963 | 0,42976066   | 1,64768057   | 0,8464694    | -14,85534    | 6,45562138   |
| 21          | Canary      | GOM           | 9.919.083  | 9.937.176  | 9.972.275  | 9.937.172  | 8.635.852  | 10.228.130 | 0,18240597   | 0,53625925   | 0,18236565   | -12,936997   | 3,11568116   |
| 22          | Canary      | GOM           | 10.627.765 | 10.640.678 | 10.610.140 | 10.364.192 | 9.831.980  | 10.481.575 | 0,1215025    | -0,1658392   | -2,4800417   | -7,4877926   | -1,3755479   |
| 23          | Canary      | GOM           | 8.561.727  | 8.496.472  | 9.331.505  | 9.188.304  | 7.260.260  | 9.737.165  | -0,762171    | 8,99091971   | 7,31834827   | -15,200987   | 13,7289825   |
| 24          | Canary      | TEN           | 6.202.615  | 6.284.237  | 6.509.582  | 6.498.694  | 5.450.339  | 6.702.490  | 1,31592885   | 4,94899329   | 4,77345442   | -12,128376   | 8,05910088   |
| 25          | Canary      | TEN           | 8.528.341  | 8.503.018  | 8.966.943  | 8.897.317  | 7.504.129  | 9.362.511  | -0,2969276   | 5,14287597   | 4,32646865   | -12,009516   | 9,78115204   |

|    |         |      |            |            |            |            |           |            |            |            |            |            |            |
|----|---------|------|------------|------------|------------|------------|-----------|------------|------------|------------|------------|------------|------------|
| 26 | Canary  | TEN  | 6.947.120  | 7.033.868  | 6.848.433  | 6.741.143  | 5.993.044 | 6.982.840  | 1,2486901  | -1,4205455 | -2,9649265 | -13,73341  | 0,5141699  |
| 27 | Canary  | TEN  | 6.145.473  | 6.194.553  | 6.657.834  | 6.498.174  | 5.307.978 | 6.804.050  | 0,79863665 | 8,33721017 | 5,73920022 | -13,627836 | 10,7164575 |
| 28 | Canary  | TEN  | 6.469.502  | 6.504.802  | 6.013.529  | 5.933.795  | 5.620.632 | 5.924.148  | 0,54563705 | -7,0480386 | -8,2804983 | -13,12111  | -8,4296133 |
| 29 | Canary  | TEN  | 8.398.747  | 8.504.759  | 8.738.990  | 8.673.970  | 7.223.797 | 9.197.034  | 1,2622359  | 4,0511162  | 3,2769531  | -13,989587 | 9,50483447 |
| 30 | Canary  | TEN  | 7.959.923  | 8.049.237  | 7.711.575  | 7.624.654  | 6.959.343 | 8.131.342  | 1,12204603 | -3,1199799 | -4,2119629 | -12,570222 | 2,15352586 |
| 31 | Canary  | TEN  | 5.397.436  | 5.477.904  | 5.480.766  | 5.455.809  | 4.808.038 | 5.828.613  | 1,49085603 | 1,54388121 | 1,08149499 | -10,919972 | 7,98855234 |
| 32 | Canary  | TEN  | 5.504.493  | 5.507.520  | 5.322.519  | 5.294.068  | 5.023.571 | 5.608.508  | 0,05499144 | -3,3059175 | -3,8227862 | -8,7368991 | 1,88963816 |
| 33 | Canary  | TEN  | 6.591.414  | 6.695.770  | 6.587.996  | 6.456.980  | 5.882.559 | 6.792.257  | 1,58321113 | -0,0518553 | -2,039532  | -10,754218 | 3,04703968 |
| 34 | Madeira | MAD1 | 7.640.148  | 7.690.512  | 6.967.251  | 6.956.067  | 6.940.615 | 7.336.526  | 0,65920189 | -8,8073817 | -8,9537663 | -9,1560137 | -3,974033  |
| 35 | Madeira | MAD1 | 7.648.979  | 7.701.071  | 7.251.362  | 7.294.749  | 7.111.883 | 7.581.292  | 0,68103207 | -5,1983016 | -4,6310756 | -7,0217999 | -0,8849155 |
| 36 | Madeira | MAD1 | 8.066.019  | 8.103.326  | 8.081.331  | 7.876.681  | 7.501.492 | 7.786.270  | 0,46252061 | 0,18983342 | -2,3473538 | -6,9988305 | -3,4682413 |
| 37 | Madeira | MAD1 | 8.892.837  | 8.870.367  | 8.491.600  | 8.440.942  | 8.129.601 | 8.086.021  | -0,2526753 | -4,5119122 | -5,0815617 | -8,5825929 | -9,0726503 |
| 38 | Madeira | MAD1 | 10.768.208 | 10.764.935 | 10.509.941 | 10.598.351 | 9.800.702 | 10.685.357 | -0,030395  | -2,3984214 | -1,5773934 | -8,9848422 | -0,7694038 |
| 39 | Madeira | MAD1 | 8.087.057  | 8.126.532  | 8.080.049  | 8.074.188  | 7.289.751 | 8.351.316  | 0,48812566 | -0,086657  | -0,1591308 | -9,8590439 | 3,26767822 |
| 40 | Madeira | MAD2 | 7.710.563  | 7.762.453  | 7.604.285  | 7.722.627  | 7.108.408 | 7.768.340  | 0,67297291 | -1,3783429 | 0,15646069 | -7,8094816 | 0,74932271 |
| 41 | Madeira | MAD2 | 7.539.569  | 7.554.416  | 7.664.196  | 7.587.877  | 6.796.452 | 7.808.030  | 0,19692107 | 1,65297247 | 0,64072628 | -9,8562265 | 3,56069425 |
| 42 | Madeira | MAD2 | 8.655.553  | 8.697.481  | 8.816.156  | 8.722.864  | 7.726.590 | 8.844.249  | 0,48440579 | 1,85549092 | 0,77766262 | -10,732572 | 2,18005713 |
| 43 | Madeira | MAD2 | 7.199.325  | 7.228.183  | 7.317.344  | 7.294.405  | 6.351.747 | 7.096.555  | 0,40084313 | 1,63930646 | 1,32067937 | -11,773027 | -1,4274949 |
| 44 | Madeira | MAD2 | 8.185.300  | 8.169.745  | 8.302.693  | 8.266.262  | 7.282.991 | 8.160.318  | -0,1900358 | 1,434193   | 0,98911463 | -11,02353  | -0,3052057 |
| 45 | Madeira | MAD2 | 7.294.856  | 7.317.581  | 7.280.291  | 7.270.892  | 6.751.055 | 7.382.948  | 0,31152089 | -0,1996612 | -0,3285055 | -7,4545817 | 1,20759066 |
| 46 | Azores  | Pico | 5.480.123  | 5.477.029  | 5.654.573  | 5.808.255  | 5.042.164 | 6.302.648  | -0,0564586 | 3,18332271 | 5,98767582 | -7,9917823 | 15,0092434 |
| 47 | Azores  | Pico | 5.515.148  | 5.537.725  | 5.610.450  | 5.815.092  | 5.082.467 | 6.169.018  | 0,40936345 | 1,7280044  | 5,43854852 | -7,8453289 | 11,8558922 |
| 48 | Azores  | Pico | 5.555.781  | 5.622.908  | 5.721.292  | 5.790.826  | 5.349.902 | 6.184.151  | 1,20823697 | 2,97907711 | 4,23063832 | -3,7056716 | 11,310201  |
| 49 | Azores  | Pico | 5.760.139  | 5.862.936  | 5.585.386  | 5.604.144  | 5.215.388 | 6.276.462  | 1,78462707 | -3,033833  | -2,7081812 | -9,4572631 | 8,96372466 |
| 50 | Azores  | Pico | 5.235.191  | 5.188.984  | 5.260.670  | 5.405.442  | 4.684.354 | 5.889.014  | -0,882623  | 0,48668711 | 3,25204945 | -10,521822 | 12,4889999 |
| 51 | Azores  | Pico | 5.266.728  | 5.363.932  | 5.236.565  | 5.202.848  | 5.026.216 | 5.685.073  | 1,84562408 | -0,5727085 | -1,2128973 | -4,5666304 | 7,94316699 |
| 52 | Azores  | TER  | 5.530.681  | 5.573.937  | 5.956.562  | 6.029.591  | 5.391.600 | 6.368.841  | 0,78210983 | 7,70033564 | 9,02076978 | -2,5147265 | 15,1547341 |
| 53 | Azores  | TER  | 6.119.146  | 6.188.786  | 6.316.285  | 6.371.385  | 5.795.505 | 6.902.495  | 1,13806731 | 3,22167505 | 4,1221275  | -5,2889978 | 12,8016066 |

|    |        |     |           |           |           |           |           |           |            |            |            |            |            |            |
|----|--------|-----|-----------|-----------|-----------|-----------|-----------|-----------|------------|------------|------------|------------|------------|------------|
| 54 | Azores | TER | 5.987.240 | 5.964.588 | 6.955.862 | 6.981.450 | 5.528.001 | 7.437.181 | -0,3783379 | 16,1781054 | 16,605481  | -7,6703038 | 24,2171852 |            |
| 55 | Azores | TER | 4.648.289 | 4.656.725 | 4.769.270 | 4.733.570 | 4.549.630 | 5.228.354 | 0,18148613 | 2,60269962 | 1,83467508 | -2,1224799 | 12,4791079 |            |
| 56 | Azores | TER | 5.839.482 | 5.910.128 | 6.014.764 | 6.099.726 | 5.404.005 | 6.524.152 | 1,20979909 | 3,00167035 | 4,45662817 | -7,457468  | 11,7248413 |            |
| 57 | Azores | TER | 6.072.647 | 6.128.589 | 6.488.984 | 6.552.471 | 5.875.306 | 7.015.236 | 0,92121278 | 6,85593943 | 7,90139786 | -3,2496784 | 15,5218803 |            |
| 58 | Azores | TER | 6.102.097 | 6.158.312 | 6.635.359 | 6.676.223 | 5.803.876 | 7.183.030 | 0,92124068 | 8,73899579 | 9,40866722 | -4,887197  | 17,7141235 |            |
| 59 | Azores | TER | 6.749.637 | 6.808.434 | 7.098.269 | 7.151.861 | 6.211.076 | 7.668.674 | 0,87111351 | 5,16519629 | 5,95919455 | -7,9791106 | 13,6160952 |            |
| 60 | Azores | TER | 5.585.066 | 5.652.361 | 5.661.363 | 5.748.960 | 5.193.093 | 6.154.608 | 1,20490966 | 1,3660895  | 2,93450427 | -7,018234  | 10,1975876 |            |
| 61 | Azores | TER | 6.273.388 | 6.325.963 | 6.679.989 | 6.735.196 | 6.033.252 | 7.142.082 | 0,8380639  | 6,48136222 | 7,36138112 | -3,8278598 | 13,8472863 |            |
|    |        |     |           |           |           |           |           |           | Overall    | 0,45733466 | 2,48473959 | 2,40315186 | -10,201945 | 9,11663058 |
|    |        |     |           |           |           |           |           |           |            | 0,45%      | 2%         | 2%         | 10,20%     | 9%         |

**Table S5.** Ranking of the plots according to the phylogenetic diversity (PD) values obtained with every tree.

| Plot number | Archipelago | Plot                | BLc128_tc_cal | BLc128_tc | BLc128_cal | BLc128 | BLc1_tc_cal | BLc1_tc | BLc1_cal | BLc1 | Lc1 | Lc128 |
|-------------|-------------|---------------------|---------------|-----------|------------|--------|-------------|---------|----------|------|-----|-------|
| 1           | IP          | Aigüestortes_1      | 10            | 14        | 10         | 14     | 14          | 14      | 14       | 14   | 14  | 14    |
| 2           | IP          | Aigüestortes_2      | 14            | 10        | 14         | 10     | 10          | 10      | 10       | 10   | 10  | 10    |
| 3           | IP          | Cabañeros_1         | 6             | 6         | 6          | 6      | 6           | 6       | 6        | 12   | 12  | 6     |
| 4           | IP          | Cabañeros_2         | 15            | 5         | 12         | 5      | 5           | 12      | 12       | 6    | 6   | 12    |
| 5           | IP          | Cabañeros_3         | 5             | 15        | 5          | 12     | 12          | 15      | 15       | 15   | 15  | 5     |
| 6           | IP          | Cabañeros_4         | 12            | 12        | 15         | 15     | 15          | 5       | 5        | 3    | 5   | 15    |
| 7           | IP          | Monfragüe_1         | 2             | 2         | 9          | 2      | 3           | 3       | 2        | 2    | 3   | 2     |
| 8           | IP          | Monfragüe_2         | 9             | 3         | 2          | 3      | 2           | 2       | 3        | 5    | 9   | 4     |
| 9           | IP          | Ordesa_1            | 3             | 9         | 3          | 9      | 9           | 9       | 9        | 9    | 2   | 3     |
| 10          | IP          | Ordesa_2            | 16            | 4         | 16         | 16     | 16          | 16      | 16       | 16   | 16  | 9     |
| 11          | IP          | Picos_1             | 1             | 16        | 1          | 4      | 1           | 4       | 1        | 4    | 1   | 16    |
| 12          | IP          | Picos_2             | 7             | 1         | 7          | 1      | 4           | 1       | 7        | 1    | 13  | 1     |
| 13          | IP          | Picos_3             | 4             | 7         | 4          | 7      | 13          | 13      | 4        | 13   | 4   | 7     |
| 14          | IP          | Picos_4             | 13            | 13        | 13         | 13     | 7           | 7       | 13       | 7    | 7   | 13    |
| 15          | IP          | Sierra_Nevada_1     | 8             | 8         | 8          | 8      | 8           | 8       | 8        | 8    | 8   | 8     |
| 16          | IP          | Sierra_Nevada_2     | 11            | 11        | 11         | 11     | 11          | 11      | 11       | 11   | 11  | 22    |
| 17          | Canary      | Acebinos            | 20            | 38        | 20         | 38     | 20          | 22      | 38       | 38   | 20  | 38    |
| 18          | Canary      | Apartacaminos       | 38            | 22        | 38         | 22     | 38          | 20      | 20       | 20   | 38  | 11    |
| 19          | Canary      | Cedro               | 21            | 20        | 22         | 20     | 21          | 38      | 21       | 22   | 22  | 19    |
| 20          | Canary      | Encima_Hayas        | 22            | 17        | 21         | 17     | 22          | 19      | 22       | 21   | 21  | 17    |
| 21          | Canary      | Fuensanta           | 17            | 21        | 17         | 21     | 17          | 21      | 17       | 19   | 19  | 20    |
| 22          | Canary      | Meseta_Vallehermoso | 19            | 19        | 19         | 19     | 19          | 17      | 19       | 17   | 23  | 21    |
| 23          | Canary      | Reventon_Oscuro     | 25            | 37        | 25         | 37     | 25          | 23      | 25       | 23   | 25  | 37    |
| 24          | Canary      | Aguas_Negras        | 23            | 42        | 30         | 42     | 29          | 25      | 29       | 25   | 17  | 42    |

|    |         |                  |    |    |    |    |    |    |    |    |    |    |
|----|---------|------------------|----|----|----|----|----|----|----|----|----|----|
| 25 | Canary  | Bco_Nieto        | 29 | 23 | 23 | 29 | 30 | 42 | 23 | 42 | 29 | 25 |
| 26 | Canary  | Cabezo_Tejo      | 30 | 25 | 29 | 25 | 23 | 29 | 30 | 29 | 42 | 36 |
| 27 | Canary  | Chinobre         | 37 | 29 | 37 | 23 | 42 | 37 | 37 | 37 | 39 | 39 |
| 28 | Canary  | Hoya_ljuana      | 42 | 44 | 42 | 44 | 37 | 44 | 42 | 44 | 44 | 44 |
| 29 | Canary  | Monte_Aguirre    | 44 | 39 | 44 | 39 | 44 | 36 | 44 | 39 | 30 | 23 |
| 30 | Canary  | Moquinal         | 26 | 36 | 26 | 36 | 26 | 39 | 26 | 36 | 37 | 29 |
| 31 | Canary  | Pijaral          | 33 | 30 | 39 | 30 | 39 | 30 | 33 | 40 | 41 | 35 |
| 32 | Canary  | Vueltas_Taganana | 36 | 40 | 33 | 40 | 33 | 41 | 39 | 30 | 36 | 40 |
| 33 | Canary  | Zapata           | 39 | 35 | 36 | 35 | 36 | 40 | 36 | 41 | 40 | 30 |
| 34 | Madeira | Funduras         | 59 | 34 | 59 | 34 | 43 | 43 | 34 | 35 | 59 | 34 |
| 35 | Madeira | Queimadas        | 28 | 41 | 43 | 41 | 59 | 45 | 59 | 43 | 35 | 41 |
| 36 | Madeira | Ribeiro_Bonito_1 | 43 | 45 | 34 | 45 | 34 | 35 | 40 | 45 | 54 | 45 |
| 37 | Madeira | Ribeiro_Bonito_2 | 34 | 43 | 28 | 43 | 41 | 59 | 43 | 59 | 45 | 43 |
| 38 | Madeira | Ribeiro_Bonito_3 | 41 | 26 | 41 | 26 | 40 | 34 | 41 | 54 | 34 | 59 |
| 39 | Madeira | Ribeiro_Frio     | 40 | 59 | 24 | 59 | 35 | 54 | 28 | 34 | 18 | 61 |
| 40 | Madeira | Chao_Ribeira     | 24 | 33 | 40 | 33 | 24 | 26 | 24 | 26 | 58 | 26 |
| 41 | Madeira | Encumeada        | 35 | 28 | 27 | 28 | 27 | 61 | 35 | 61 | 61 | 33 |
| 42 | Madeira | Fanal_1          | 27 | 61 | 35 | 61 | 28 | 27 | 27 | 58 | 43 | 57 |
| 43 | Madeira | Fanal_2          | 45 | 24 | 45 | 24 | 45 | 58 | 45 | 57 | 57 | 58 |
| 44 | Madeira | Fanal_3          | 53 | 27 | 53 | 27 | 53 | 33 | 54 | 24 | 26 | 53 |
| 45 | Madeira | Ginjas           | 61 | 53 | 61 | 53 | 54 | 18 | 18 | 27 | 53 | 28 |
| 46 | Azores  | Caveiro_2        | 56 | 58 | 18 | 58 | 61 | 24 | 53 | 18 | 27 | 54 |
| 47 | Azores  | Caveiro_Base     | 18 | 57 | 56 | 57 | 58 | 57 | 58 | 33 | 33 | 18 |
| 48 | Azores  | Caveiro_Paul     | 58 | 54 | 58 | 54 | 56 | 53 | 61 | 53 | 24 | 24 |
| 49 | Azores  | Chao_Verde       | 60 | 18 | 54 | 56 | 18 | 56 | 56 | 56 | 56 | 56 |
| 50 | Azores  | Euphorbias       | 49 | 56 | 49 | 18 | 57 | 28 | 31 | 52 | 52 | 52 |
| 51 | Azores  | Pico_Redondo     | 54 | 49 | 60 | 49 | 31 | 52 | 57 | 28 | 46 | 48 |



[illegible]

**Table S6.** Comparison of the PD values obtained against null models (values of SES) for each phylogenetic tree. In bold are marked the values with significant phylogenetic structure (PDc: PD clustering; PDov: PD overdispersion). The end of each column refers to the total number of plots on which significant phylogenetic structure was found. \*\*Indicates statistical significance (p-value < 0.05).

**Time-stamped trees**

|                 | <b>A</b>             |                               | <b>C</b>              |                               | <b>E</b>            |                               | <b>G</b>            |                               |
|-----------------|----------------------|-------------------------------|-----------------------|-------------------------------|---------------------|-------------------------------|---------------------|-------------------------------|
| <b>Plot</b>     | <b>BLc128_tc_cal</b> | <b>Phylogenetic structure</b> | <b>BLc128_cal</b>     | <b>Phylogenetic structure</b> | <b>BLc1_tc_cal</b>  | <b>Phylogenetic structure</b> | <b>BLc1_cal</b>     | <b>Phylogenetic structure</b> |
| Aigüestortes_1  | -0.9618797           |                               | -1.020.112.387        |                               | -150.192.445        |                               | -169.370.207        |                               |
| Aigüestortes_2  | -12.500.924          |                               | -1.234.556.775        |                               | -138.760.097        |                               | -143.298.829        |                               |
| Cabañeros_1     | -15.547.358          |                               | -1.525.198.241        |                               | -132.393.417        |                               | -236.965.026        | ** PDc                        |
| Cabañeros_2     | -12.487.315          |                               | -1.235.740.241        |                               | -146.711.900        |                               | -191.705.486        |                               |
| Cabañeros_3     | -0.1060019           |                               | -0.186149679          |                               | -0.57118786         |                               | -160.340.739        |                               |
| Cabañeros_4     | -0.7897052           |                               | -1.010.867.426        |                               | -121.305.482        |                               | -151.120.003        |                               |
| Monfragüe_1     | 0.5450304            |                               | 0.640657996           |                               | 0.27128829          |                               | 0.83442311          |                               |
| Monfragüe_2     | 15.757.053           |                               | 1.796.159.628         |                               | 165.887.332         |                               | 177.258.509         |                               |
| Ordesa_1        | <b>-21.671.615</b>   | ** PDc                        | <b>-2.028.394.966</b> | ** PDc                        | <b>-336.562.506</b> | ** PDc                        | <b>-324.313.504</b> | ** PDc                        |
| Ordesa_2        | 0.0084834            |                               | 0.009131087           |                               | -113.061.544        |                               | -120.881.608        |                               |
| Picos_1         | -17.158.922          |                               | -1.593.905.931        |                               | -170.453.168        |                               | -192.110.600        |                               |
| Picos_2         | -16.744.108          |                               | -1.427.320.853        |                               | <b>-254.444.496</b> | ** PDc                        | <b>-221.064.169</b> | ** PDc                        |
| Picos_3         | -0.6938465           |                               | -0.707693727          |                               | -0.53313613         |                               | -0.97720140         |                               |
| Picos_4         | -14.276.994          |                               | -1.493.355.125        |                               | <b>-203.136.629</b> | ** PDc                        | <b>-245.476.804</b> | ** PDc                        |
| Sierra_Nevada_1 | 10.262.094           |                               | 0.215970213           |                               | 0.12667955          |                               | -0.09105434         |                               |
| Sierra_Nevada_2 | -16.317.777          |                               | -1.529.716.632        |                               | <b>-234.504.689</b> | ** PDc                        | <b>-205.908.409</b> | ** PDc                        |
| Acebinos        | <b>23.116.437</b>    | ** PDov                       | <b>2.759.249.733</b>  | ** PDov                       | <b>220.055.435</b>  | ** PDov                       | <b>261.927.651</b>  | ** PDov                       |
| Apartacaminos   | -10.563.663          |                               | -1.101.253.589        |                               | -108.782.277        |                               | -0.82006562         |                               |
| Cedro           | 12.100.359           |                               | 1.601.442.282         |                               | 122.153.580         |                               | 125.317.154         |                               |
| Encima_Hayas    | 0.7876273            |                               | 1.105.617.974         |                               | 0.95976862          |                               | 0.92363022          |                               |
| Fuentsanta      | 12.682.330           |                               | 1.527.440.724         |                               | 135.867.192         |                               | 147.832.242         |                               |

|                     |                           |                              |                            |                            |
|---------------------|---------------------------|------------------------------|----------------------------|----------------------------|
| Meseta_Vallehermoso | 10.620.199                | 1.581.868.599                | 0.95872280                 | 122.580.326                |
| Reventon_Oscuro     | 0.6826364                 | 0.790264734                  | 0.56283358                 | 122.718.431                |
| Aguas_Negras        | -0.2158947                | -0.081314441                 | 0.01601679                 | -0.01268958                |
| Bco_Nieto           | -0.5627684                | -0.268553578                 | -0.41613269                | -0.52686081                |
| Cabezo_Tejo         | 0.5170553                 | 0.427038809                  | 0.53304523                 | 0.98694491                 |
| Chinobre            | -12.318.457               | -0.963433674                 | -0.86013875                | -0.89747636                |
| Hoya_ljuana         | 11.578.559                | 0.997793317                  | 0.92833793                 | 124.135.987                |
| Monte_Aguirre       | -0.3876842                | -0.444718312                 | -0.02370204                | 0.34370794                 |
| Moquinal            | 0.1998452                 | 0.464127151                  | 0.39704287                 | 0.58512366                 |
| Pijaral             | -0.8117891                | -0.724301733                 | -0.37729674                | -0.42117096                |
| Vueltas_Taganana    | -0.6186813                | -0.693562946                 | -0.61876846                | -0.81952141                |
| Zapata              | -0.7307869                | -0.721612953                 | -0.47168322                | -0.24490397                |
| Funduras            | -0.5278698                | -0.594256464                 | -0.44947620                | -0.34326428                |
| Queimadas           | -17.009.899               | -1.871.089.837               | -165.281.297               | -178.353.232               |
| Ribeiro_Bonito_1    | -0.2369041                | -0.038222903                 | -0.15955370                | -0.29744413                |
| Ribeiro_Bonito_2    | 15.835.793                | 1.608.379.930                | 153.976.809                | 166.112.236                |
| Ribeiro_Bonito_3    | 0.6785983                 | 0.706813162                  | 0.50574122                 | 0.91023340                 |
| Ribeiro_Frio        | -15.844.645               | -1.319.686.586               | -129.784.937               | -142.859.288               |
| Chao_Ribeira        | -11.232.824               | -1.330.203.948               | -109.987.648               | -0.93871829                |
| Encumeada           | -17.486.298               | -1.841.424.173               | -163.726.636               | -181.479.185               |
| Fanal_1             | -0.1592259                | -0.051515107                 | -0.11822291                | -0.14409462                |
| Fanal_2             | -0.6358419                | -0.405265129                 | -0.29622478                | -0.40063180                |
| Fanal_3             | 0.2345460                 | 0.236344697                  | 0.02700662                 | -0.08602923                |
| Ginjas              | -18.776.511               | -1.788.784.854               | -136.624.383               | -134.748.381               |
| Caveiro_2           | <b>-23.697.164</b> ** PDc | <b>-2.368.274.733</b> ** PDc | <b>-307.683.458</b> ** PDc | <b>-244.823.979</b> ** PDc |
| Caveiro_Base        | <b>-22.839.941</b> ** PDc | <b>-2.273.540.272</b> ** PDc | <b>-294.204.517</b> ** PDc | <b>-237.803.650</b> ** PDc |
| Caveiro_Paul        | <b>-21.424.307</b> ** PDc | <b>-2.249.911.576</b> ** PDc | <b>-249.873.170</b> ** PDc | <b>-253.725.081</b> ** PDc |

|                    |                           |                              |                            |                            |
|--------------------|---------------------------|------------------------------|----------------------------|----------------------------|
| Chao_Verde         | -0.1997285                | -0.038140088                 | -0.62237529                | -0.68990455                |
| Euphorbias         | -15.173.943               | -1.364.414.247               | -174.273.570               | -126.446.506               |
| Pico_Redondo       | -17.950.549               | -1.854.037.349               | -191.861.381               | <b>-215.402.484</b> ** PDc |
| Caldeira_Silvia    | -14.136.524               | -1.597.476.101               | -151.684.688               | -159.376.370               |
| Chambre_A          | -0.5059057                | -0.500015975                 | -0.23833408                | -0.43028795                |
| Lagoa_Pinheiro_B   | <b>-24.287.412</b> ** PDc | <b>-2.339.232.862</b> ** PDc | <b>-219.450.485</b> ** PDc | -196.770.748               |
| Lagoinha_B         | -19.615.266               | -1.920.027.188               | <b>-215.421.777</b> ** PDc | <b>-244.598.110</b> ** PDc |
| Lomba              | -0.2136489                | -0.240725653                 | -0.10152327                | -0.40311193                |
| Morro_Assombrado   | -18.920.701               | -1.873.313.537               | -180.105.303               | -189.440.231               |
| Pico_Alto_Nascente | -15.419.063               | -1.430.350.477               | -157.003.512               | -136.925.629               |
| Pico_X_B           | -0.5325111                | -0.446135961                 | -0.45289605                | -0.36051974                |
| Terra_Brava_B      | 0.2933086                 | 0.254005610                  | 0.45590616                 | 0.33225208                 |
| Terra_Brava_A      | -13.365.512               | -1.406.869.481               | -143.776.158               | -146.670.107               |
| <b>Total</b>       | <b>6</b>                  | <b>6</b>                     | <b>10</b>                  | <b>11</b>                  |

**Non-ultrametric trees**

| Plot                | B<br>BLc128_tc        | Phylogenetic<br>structure | D<br>BLc128         | Phylogenetic<br>structure | I<br>Lc128            | Phylogenetic<br>structure | F<br>BLc1_tc        | Phylogenetic<br>structure | H<br>BLc1             | Phylogenetic<br>structure | J<br>Lc1            | Phylogenetic<br>structure |
|---------------------|-----------------------|---------------------------|---------------------|---------------------------|-----------------------|---------------------------|---------------------|---------------------------|-----------------------|---------------------------|---------------------|---------------------------|
| Aigüestortes_1      | -1.842.632.437        |                           | -185.686.135        |                           | -1.837.235.808        |                           | <b>-317.725.055</b> | ** PDc                    | <b>-3.123.042.822</b> | ** PDc                    | -185.235.655        |                           |
| Aigüestortes_2      | -1.435.285.964        |                           | -143.326.021        |                           | -1.116.842.582        |                           | -186.981.669        |                           | -1.537.829.854        |                           | -170.277.974        |                           |
| Cabañeros_1         | -1.515.104.634        |                           | -153.411.655        |                           | -1.839.583.096        |                           | -158.278.670        |                           | -1.048.197.026        |                           | -129.755.015        |                           |
| Cabañeros_2         | -0.272230486          |                           | -0.27585717         |                           | 0.501641669           |                           | -134.134.636        |                           | -1.476.977.803        |                           | -165.141.378        |                           |
| Cabañeros_3         | 0.218285182           |                           | 0.25757827          |                           | -0.572658644          |                           | <b>-199.129.336</b> | ** PDc                    | <b>-2.239.777.732</b> | ** PDc                    | <b>-204.986.998</b> | ** PDc                    |
| Cabañeros_4         | -0.931786933          |                           | -104.412.465        |                           | -0.949866567          |                           | <b>-250.598.130</b> | ** PDc                    | <b>-2.491.783.424</b> | ** PDc                    | <b>-245.312.547</b> | ** PDc                    |
| Monfragüe_1         | -0.277533607          |                           | -0.39578290         |                           | -0.638197871          |                           | -0.77961249         |                           | -0.899392521          |                           | 0.31716256          |                           |
| Monfragüe_2         | 0.983761295           |                           | 0.97799242          |                           | 0.689082496           |                           | 115.118.908         |                           | 1.135.541.327         |                           | <b>195.875.554</b>  | ** PDov                   |
| Ordesa_1            | <b>-2.346.675.366</b> | ** PDc                    | <b>-233.191.166</b> | ** PDc                    | <b>-2.737.883.651</b> | ** PDc                    | <b>-308.843.085</b> | ** PDc                    | <b>-3.247.006.983</b> | ** PDc                    | <b>-256.369.355</b> | ** PDc                    |
| Ordesa_2            | -1.665.244.965        |                           | -182.043.458        |                           | -1.670.009.681        |                           | <b>-200.927.887</b> | ** PDc                    | -2.023.864.777        |                           | <b>-214.336.809</b> | ** PDc                    |
| Picos_1             | <b>-2.834.135.043</b> | ** PDc                    | <b>-295.089.666</b> | ** PDc                    | <b>-2.574.836.444</b> | ** PDc                    | <b>-253.322.649</b> | ** PDc                    | <b>-2.725.550.224</b> | ** PDc                    | -146.395.311        |                           |
| Picos_2             | -1.878.156.782        |                           | <b>-204.988.786</b> | ** PDc                    | -1.824.275.199        |                           | <b>-282.468.682</b> | ** PDc                    | <b>-2.615.045.768</b> | ** PDc                    | <b>-229.747.622</b> | ** PDc                    |
| Picos_3             | -1.323.273.260        |                           | -143.898.596        |                           | -1.500.188.522        |                           | -130.336.145        |                           | -1.229.051.978        |                           | -0.08826269         |                           |
| Picos_4             | <b>-2.653.234.538</b> | ** PDc                    | <b>-251.176.906</b> | ** PDc                    | <b>-2.873.898.702</b> | ** PDc                    | <b>-312.505.707</b> | ** PDc                    | <b>-2.954.743.248</b> | ** PDc                    | <b>-258.246.836</b> | ** PDc                    |
| Sierra_Nevada_1     | 0.329649614           |                           | 0.28245981          |                           | -0.011235566          |                           | -0.28589999         |                           | -0.548807204          |                           | -0.46937209         |                           |
| Sierra_Nevada_2     | <b>-1.860.687.136</b> | ** PDc                    | <b>-193.560.629</b> | ** PDc                    | -1.608.004.364        |                           | <b>-202.209.608</b> | ** PDc                    | <b>-2.311.626.033</b> | ** PDc                    | <b>-222.446.971</b> | ** PDc                    |
| Acebinos            | <b>3.147.791.868</b>  | ** PDov                   | <b>296.186.686</b>  | ** PDov                   | <b>3.196.872.658</b>  | ** PDov                   | <b>279.503.685</b>  | ** PDov                   | <b>2.585.813.467</b>  | ** PDov                   | 182.508.591         |                           |
| Apartacaminos       | -1.092.640.101        |                           | -116.104.813        |                           | -0.881900380          |                           | -0.13697967         |                           | -0.146687355          |                           | 0.87134525          |                           |
| Cedro               | <b>2.152.341.652</b>  | ** PDov                   | 189.521.413         |                           | <b>2.527.590.768</b>  | ** PDov                   | <b>252.610.820</b>  | ** PDov                   | <b>2.189.919.919</b>  | ** PDov                   | 200.689.616         |                           |
| Encima_Hayas        | 0.876697663           |                           | 0.87429980          |                           | 0.356452654           |                           | 0.92529721          |                           | 0.817707264           |                           | 0.88772298          |                           |
| Fuensanta           | 1.172.857.316         |                           | 107.237.722         |                           | 0.873343471           |                           | 116.750.232         |                           | 1.137.840.940         |                           | 0.86087487          |                           |
| Meseta_Vallehermoso | <b>2.132.068.756</b>  | ** PDov                   | <b>210.658.087</b>  | ** PDov                   | <b>2.578.580.359</b>  | ** PDov                   | <b>209.880.288</b>  | ** PDov                   | 1.897.967.621         |                           | 137.080.099         |                           |
| Reventon_Oscuro     | 0.647576890           |                           | 0.51864174          |                           | 0.045864359           |                           | 187.522.188         |                           | 1.600.617.263         |                           | 204.432.700         |                           |
| Aguas_Negras        | -0.569178082          |                           | -0.55413604         |                           | -0.889812289          |                           | -0.19907303         |                           | -0.289773721          |                           | -0.22470033         |                           |

|                  |                              |                            |                              |                            |                              |                            |
|------------------|------------------------------|----------------------------|------------------------------|----------------------------|------------------------------|----------------------------|
| Bco_Nieto        | -0.895495772                 | -0.98326012                | -0.940139661                 | -0.78466117                | -0.901788224                 | -0.96811356                |
| Cabezo_Tejo      | -0.200670282                 | -0.11725586                | -0.575189845                 | -0.57120774                | -0.721818363                 | -0.82106301                |
| Chinobre         | -1.438.693.681               | -141.617.696               | -1.695.995.907               | -0.92406374                | -1.123.921.353               | -119.528.635               |
| Hoya_ljuana      | 0.598156503                  | 0.65514853                 | 0.195751839                  | -0.15855343                | -0.293706921                 | -0.69605572                |
| Monte_Aguirre    | -0.658213333                 | -0.44052392                | -0.893169946                 | -0.39297126                | -0.456326545                 | -0.33738715                |
| Moquinal         | -0.573891790                 | -0.43929735                | -0.675795373                 | -126.238.901               | -1.434.183.736               | -115.478.100               |
| Pijaral          | -1.085.863.335               | -103.285.422               | -1.266.500.671               | -113.484.686               | -1.153.378.029               | -0.79084498                |
| Vueltas_Taganana | -0.540613139                 | -0.48752253                | -0.438569092                 | -0.99782785                | -0.979718066                 | -0.73540929                |
| Zapata           | -1.449.562.472               | -129.818.851               | -1.442.771.471               | <b>-185.077.706</b> ** PDc | <b>-2.110.979.731</b> ** PDc | <b>-208.284.893</b> ** PDc |
| Funduras         | 0.854661630                  | 0.82996462                 | 0.960761464                  | -0.38458703                | -0.291343909                 | -0.18357648                |
| Queimadas        | 0.059735267                  | 0.07635189                 | 0.512951267                  | -0.80840119                | -0.706114560                 | -0.85173435                |
| Ribeiro_Bonito_1 | 1.399.828.476                | 139.137.267                | 1.912.143.816                | 152.276.627                | 1.310.055.273                | 0.68074453                 |
| Ribeiro_Bonito_2 | <b>2.237.645.696</b> ** PDov | <b>212.775.728</b> ** PDov | <b>2.492.922.087</b> ** PDov | 185.741.487                | 1.766.126.195                | 0.62919993                 |
| Ribeiro_Bonito_3 | 1.281.566.588                | 124.197.162                | 1.625.023.565                | 0.81421092                 | 0.948346341                  | 0.28565923                 |
| Ribeiro_Frio     | -0.007579672                 | -0.02303678                | 0.162848611                  | -0.21037193                | -0.179951441                 | -0.42281355                |
| Chao_Ribeira     | 0.531012266                  | 0.50988422                 | 0.799261343                  | 0.27787383                 | 0.562174351                  | 0.12480696                 |
| Encumeada        | -0.509972818                 | -0.44710182                | -0.349241254                 | -0.45032717                | -0.517477723                 | -0.82173592                |
| Fanal_1          | 0.370442636                  | 0.39461401                 | 0.403603696                  | 0.43810686                 | 0.410021251                  | 0.05139102                 |
| Fanal_2          | 0.127881608                  | 0.17689353                 | 0.006702838                  | 0.26418783                 | 0.131406086                  | -0.62296144                |
| Fanal_3          | 0.498871564                  | 0.37719679                 | 0.529161952                  | 0.53889802                 | 0.531214552                  | -0.18542837                |
| Ginjas           | -0.053296190                 | -0.13106299                | 0.259522234                  | -0.26489928                | -0.223819555                 | -0.56857744                |
| Caveiro_2        | -1.299.383.525               | -138.659.952               | -1.244.197.728               | -139.250.503               | -0.926604602                 | -0.50042350                |
| Caveiro_Base     | -1.732.313.999               | -166.078.254               | -1.409.966.227               | <b>-197.925.092</b> ** PDc | -1.462.292.967               | -137.096.784               |
| Caveiro_Paul     | -1.555.948.280               | -158.164.980               | -1.033.049.181               | -173.759.742               | -1.532.682.033               | -121.086.720               |
| Chao_Verde       | -0.024901465                 | 0.12283207                 | -0.117197676                 | -0.40935758                | -0.297472804                 | 0.66055654                 |
| Euphorbias       | -0.886901304                 | -0.98292803                | -0.996282182                 | -110.295.471               | -0.825909920                 | -0.27164115                |
| Pico_Redondo     | -0.918953627                 | -0.76307568                | -0.453549544                 | -110.609.483               | -1.198.862.596               | -0.64460739                |

|                    |                              |                            |                              |              |              |             |
|--------------------|------------------------------|----------------------------|------------------------------|--------------|--------------|-------------|
| Caldeira_Silvia    | -0.799529910                 | -0.81048718                | -0.200435838                 | -0.29376790  | -0.076945982 | 0.19792314  |
| Chambre_A          | -0.375630947                 | -0.22335514                | 0.130167724                  | -0.02400011  | 0.006118026  | 0.58949263  |
| Lagoa_Pinheiro_B   | <b>-1.940.188.951</b> ** PDc | <b>-214.931.518</b> ** PDc | <b>-1.636.680.380</b> ** PDc | -0.88186984  | -0.660312202 | -0.44603502 |
| Lagoinha_B         | -0.902272234                 | -110.308.121               | -0.512512856                 | -104.315.609 | -0.936377430 | -0.34276045 |
| Lomba              | -0.347862163                 | -0.31157396                | -0.182911771                 | -0.14442746  | 0.062708897  | 0.52329211  |
| Morro_Assombrado   | -1.147.647.470               | -115.389.592               | -0.434088126                 | -0.76060323  | -0.675232025 | -0.26291119 |
| Pico_Alto_Nascente | -1.178.487.862               | -103.068.413               | -0.647232217                 | -0.53870392  | -0.463434402 | 0.14210533  |
| Pico_X_B           | -0.567056559                 | -0.52817370                | -0.347764503                 | -0.09969352  | -0.024149721 | 0.40983112  |
| Terra_Brava_B      | 0.116314798                  | 0.19865281                 | 0.349259779                  | 0.34523349   | 0.506955625  | 100.816.227 |
| Terra_Brava_A      | -0.792222672                 | -0.81157186                | -0.238349902                 | -0.36975977  | -0.260898121 | -0.03874059 |
| <b>Total</b>       | <b>9</b>                     | <b>9</b>                   | <b>8</b>                     | <b>14</b>    | <b>11</b>    | <b>9</b>    |
